# Supplementary material for: A theoretical study of new representatives of closed- and open-circle benzofuran and benzocyclopentadienone oligomers
Source: Royal Society of Chemistry journal article supplement (doi:10.1039/c8nj00601f), 2018-01-01
Supplement: c8nj00601f1.pdf [file c8nj00601f1.pdf]

# A theoretical study of new representatives of closed- and open-circle benzofuran and benzocyclopentadienone oligomers

Nataliya N. Karaush<sup>a,\*</sup>, Gleb V. Baryshnikov<sup>a,b</sup>, Hans Ågren<sup>b,c</sup>  
and Boris F. Minaev<sup>a</sup>

<sup>a</sup> *Department of Chemistry and Nanomaterials Science,  
Bogdan Khmelnytsky National University, 18031, Cherkasy, Ukraine*

<sup>b</sup> *Division of Theoretical Chemistry and Biology, School of Engineering Sciences in  
Chemistry, Biotechnology and Health, KTH Royal Institute of Technology, 10691  
Stockholm, Sweden*

<sup>c</sup> *Institute of Nanotechnology, Spectroscopy and Quantum Chemistry, Siberian  
Federal University, Svobodny pr. 79, 660041 Krasnoyarsk, Russia*

## Electronic Supplementary Information

### List of Content

|                                                                                                            |    |
|------------------------------------------------------------------------------------------------------------|----|
| Bond lengths for selected [n]benzofuran and [n]benzocyclopentadienone systems (Fig. S1–S11)                | 2  |
| <b>Table S1.</b> Total energies of the studied open-circle benzofuran and benzocyclopentadienone oligomers | 8  |
| <b>Table S2.</b> Total energies of the studied oxa[n]circulenes and [n]circulene ketones                   | 8  |
| <b>Table S3.</b> HOMO-LUMO gap for [n]benzofurans and [n]benzocyclopentadienones                           | 9  |
| Optimized Cartesian coordinates for selected compounds (Tables S4–S31)                                     | 10 |

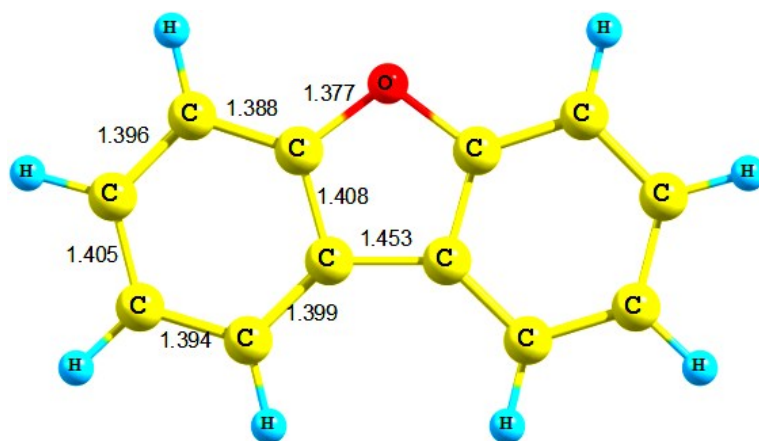

**Fig. S1.** Bond lengths in dibenzofuran calculated at the B3LYP/6-31(d) level of theory

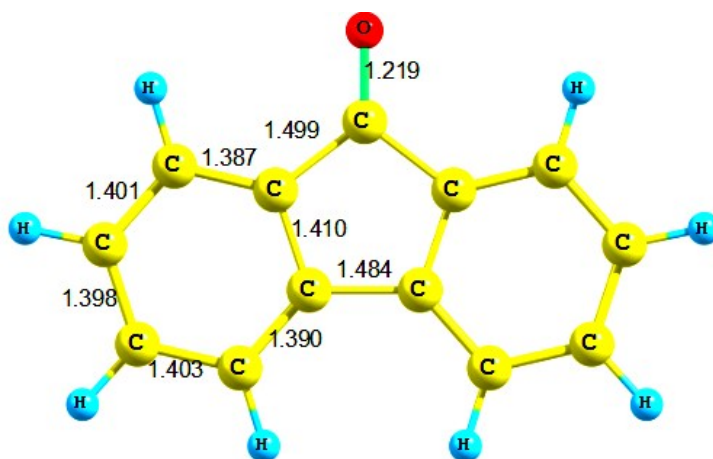

**Fig. S2.** Bond lengths in fluoren-9-one calculated at the B3LYP/6-31(d) level of theory

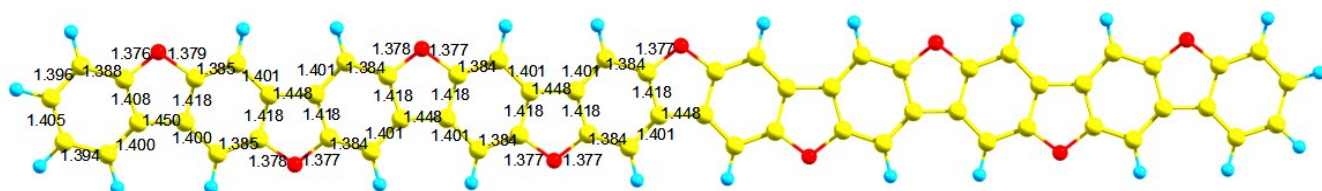

**Fig. S3.** Bond lengths in the linear benzofuran **A9** calculated at the B3LYP/6-31(d) level of theory

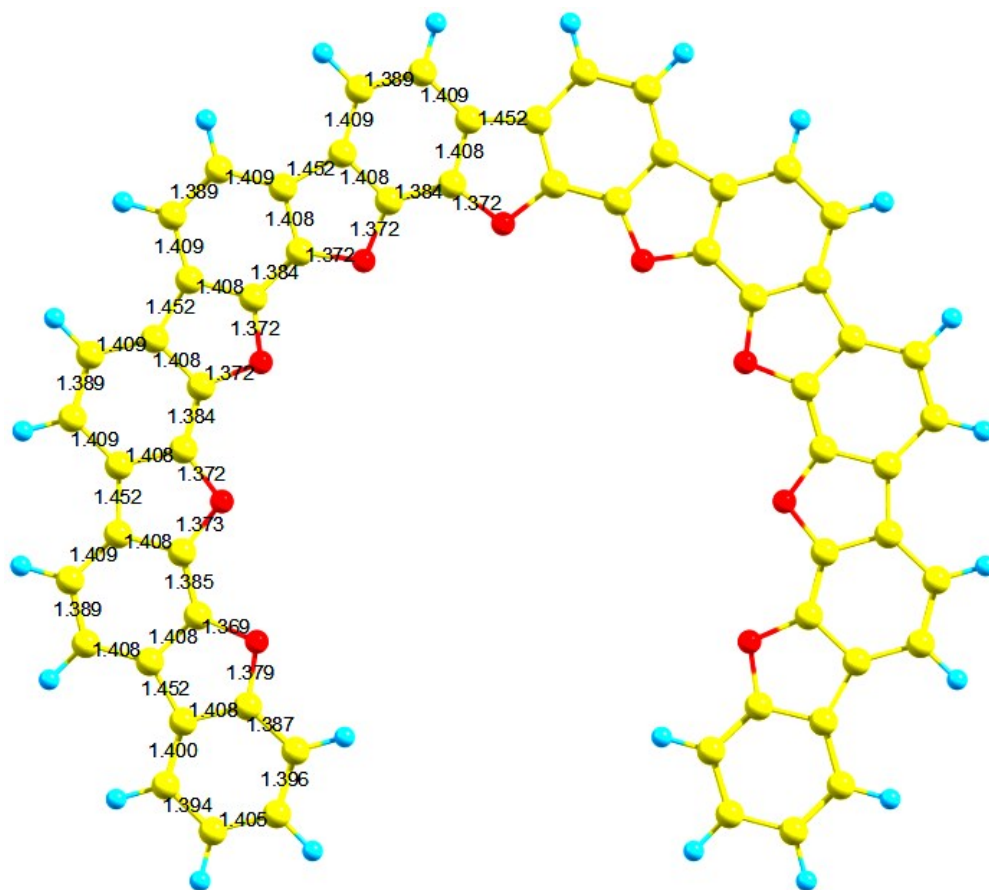

**Fig. S4.** Bond lengths in the fan-shaped benzofuran **B9** calculated at the B3LYP/6-31(d) level of theory

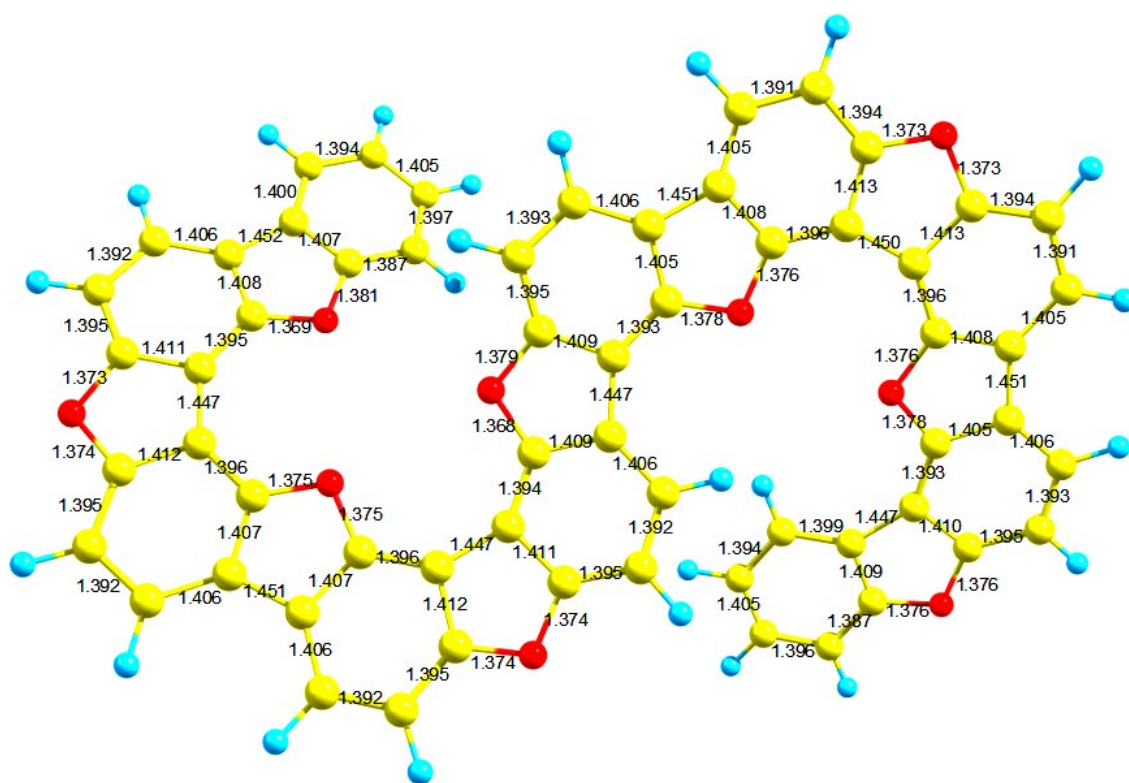

**Fig. S5.** Bond lengths in the S-shaped benzofuran **D9'** calculated at the B3LYP/6-31(d) level of theory

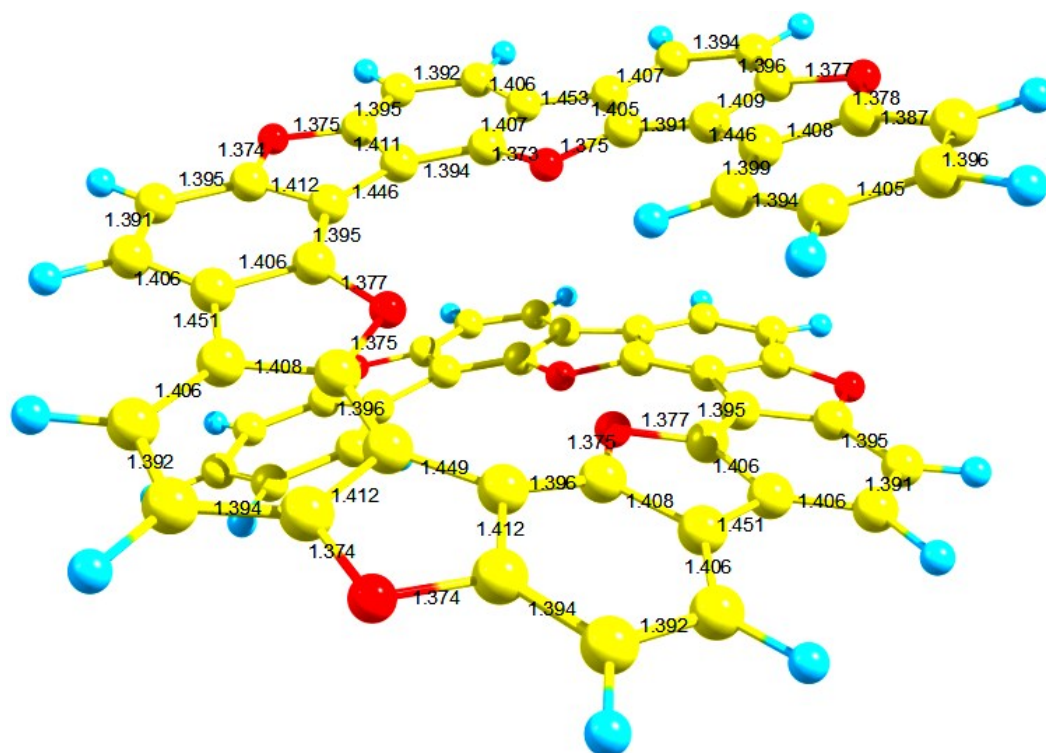

**Fig. S6.** Bond lengths in the helical benzofuran **D9** calculated at the B3LYP/6-31(d) level of theory

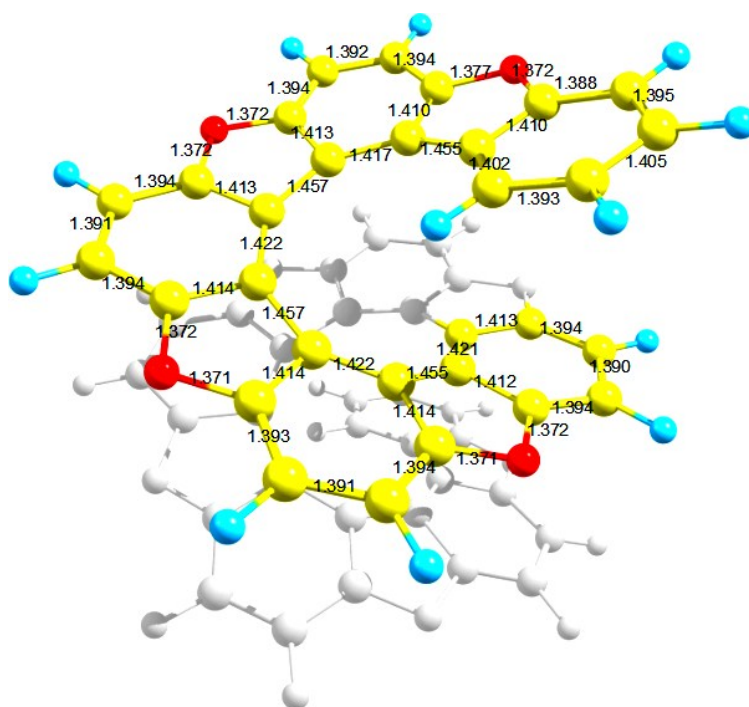

**Fig. S7.** Bond lengths in the helical benzofuran **C9** calculated at the B3LYP/6-31(d) level of theory

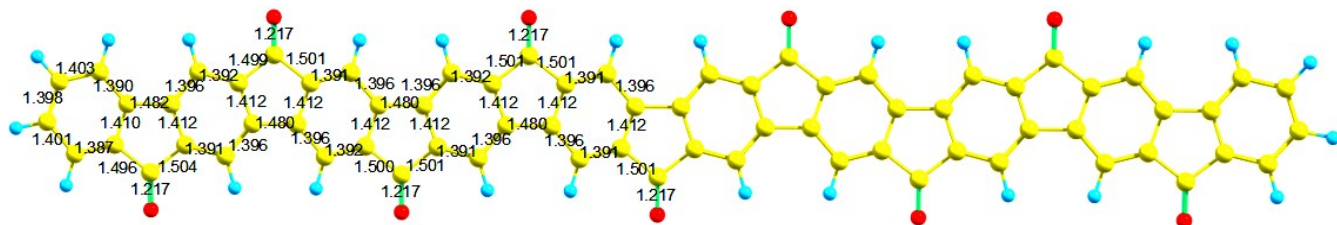

**Fig. S8.** Bond lengths in the linear benzocyclopentadienone **A9** calculated at the B3LYP/6-31(d) level of theory



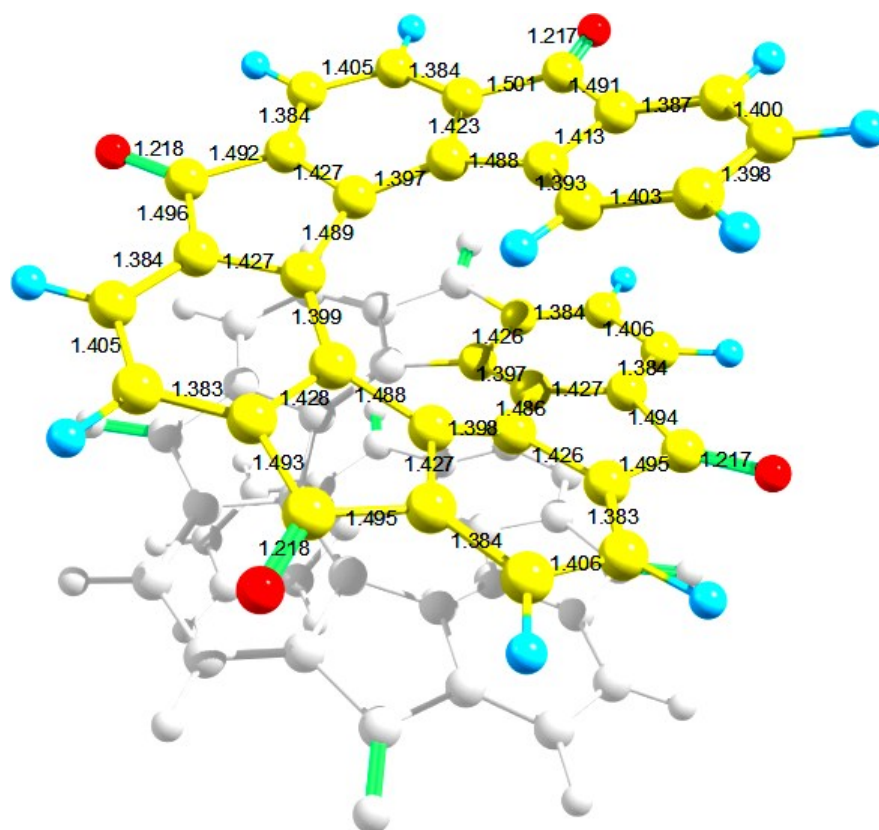

**Fig. S11.** Bond lengths in the helical benzocyclopentadienone **C9** calculated at the B3LYP/6-31(d) level of theory

**Table S1.** Total energies of the studied open-circle benzofuran and benzocyclopentadienone oligomers calculated at the B3LYP/6-31(d) level of theory

|                                   | $E_{tot}, a.u.$ |           | $E_{tot}, a.u.$ |           | $E_{tot}, a.u.$ |           | $E_{tot}, a.u.$ |
|-----------------------------------|-----------------|-----------|-----------------|-----------|-----------------|-----------|-----------------|
| [n]benzofuran systems             |                 |           |                 |           |                 |           |                 |
| <b>A1</b>                         | -537.4626       |           |                 |           |                 |           |                 |
| <b>A2</b>                         | -842.4083       | <b>B2</b> | -842.4034       | <b>C2</b> | -842.6112       | <b>D2</b> | -842.6130       |
| <b>A3</b>                         | -1147.4875      | <b>B3</b> | -1147.4752      | <b>C3</b> | -1147.4737      | <b>D3</b> | -1147.4857      |
| <b>A4</b>                         | -1452.5668      | <b>B4</b> | -1452.5514      | <b>C4</b> | -1452.5429      | <b>D4</b> | -1452.5649      |
| <b>A5</b>                         | -1757.6460      | <b>B5</b> | -1757.6254      | <b>C5</b> | -1757.6096      | <b>D5</b> | -1757.6387      |
| <b>A6</b>                         | -2062.7252      | <b>B6</b> | -2062.6993      | <b>C6</b> | -2062.6771      | <b>D6</b> | -2062.7157      |
| <b>A7</b>                         | -2367.8044      | <b>B7</b> | -2367.7733      | <b>C7</b> | -2367.7440      | <b>D7</b> | -2367.7902      |
| <b>A8</b>                         | -2672.8836      | <b>B8</b> | -2672.8470      | <b>C8</b> | -2672.8105      | <b>D8</b> | -2672.8669      |
| <b>A9</b>                         | -2977.9628      | <b>B9</b> | -2977.9210      | <b>C9</b> | -2977.8770      | <b>D9</b> | -2978.6468      |
| [n]benzocyclopentadienone systems |                 |           |                 |           |                 |           |                 |
| <b>A1</b>                         | -575.4370       |           |                 |           |                 |           |                 |
| <b>A2</b>                         | -918.6249       | <b>B2</b> | -918.6164       | <b>C2</b> | -918.6180       | <b>D2</b> | -918.6274       |
| <b>A3</b>                         | -1261.8121      | <b>B3</b> | -1261.7948      | <b>C3</b> | -1261.7933      | <b>D3</b> | -1261.8166      |
| <b>A4</b>                         | -1605.3873      | <b>B4</b> | -1604.9730      | <b>C4</b> | -1604.9697      | <b>D4</b> | -1604.9886      |
| <b>A5</b>                         | -1948.1863      | <b>B5</b> | -1948.1509      | <b>C5</b> | -1948.1452      | <b>D5</b> | -1948.1783      |
| <b>A6</b>                         | -2291.3734      | <b>B6</b> | -2291.3290      | <b>C6</b> | -2291.3203      | <b>D6</b> | -2291.3476      |
| <b>A7</b>                         | -2634.5605      | <b>B7</b> | -2634.5068      | <b>C7</b> | -2634.4952      | <b>D7</b> | -2634.5371      |
| <b>A8</b>                         | -2977.7475      | <b>B8</b> | -2977.6847      | <b>C8</b> | -2977.6698      | <b>D8</b> | -2977.7063      |
| <b>A9</b>                         | -3320.9346      | <b>B9</b> | -3320.8625      | <b>C9</b> | -3320.8445      | <b>D9</b> | -3320.8960      |

**Table S2.** Total energies of the studied oxa[n]circulenes and [n]circulene ketones calculated at the B3LYP/6-31(d) level of theory

|                  | $E_{tot}, a.u.$ | n                    | $E_{tot}, a.u.$ |
|------------------|-----------------|----------------------|-----------------|
| oxa[n]circulenes |                 | [n]circulene ketones |                 |
| 4                | -609.7764       | 4                    | -686.0339       |
| 6                | -915.0820       | 6                    | -1029.4618      |
| 8                | -1220.3120      | 8                    | -1372.7399      |
| 10               | -1525.3038      | 10                   | -1715.8051      |
| 12               | -1830.2833      | 12                   | -2058.9329      |
| 14               | -2135.3288      | 14                   | -2402.1067      |
| 16               | -2440.4037      | 16                   | -2745.2820      |
| 18               | -2745.4659      | 18                   | -3088.3972      |
| 20               | -3050.4694      | 20                   | -3431.4424      |
| 22               | -3355.4095      | 22                   | -3774.5666      |
| 24               | -3660.3612      | 24                   | -4117.7468      |
| 26               | -3965.4620      | 26                   | -4460.9183      |
| 28               | -4270.5420      | 28                   | -4804.0571      |
| 30               | -4575.5983      | 30                   | -5147.1444      |



**Table S3.** HOMO-LUMO gap for [n]benzofurans and [n]benzocyclopentadienones calculated at the B3LYP/6-31(d) level of theory

|                                   | HOMO-LUMO gap, eV |           | HOMO-LUMO gap, eV |           | HOMO-LUMO gap, eV |           | HOMO-LUMO gap, eV |
|-----------------------------------|-------------------|-----------|-------------------|-----------|-------------------|-----------|-------------------|
| [n]benzofuran systems             |                   |           |                   |           |                   |           |                   |
| <b>A1</b>                         | 4.95              |           |                   |           |                   |           |                   |
| <b>A2</b>                         | 4.32              | <b>B2</b> | 4.52              | <b>C2</b> | 4.37              | <b>D2</b> | 4.73              |
| <b>A3</b>                         | 3.91              | <b>B3</b> | 4.23              | <b>C3</b> | 4.08              | <b>D3</b> | 4.59              |
| <b>A4</b>                         | 3.67              | <b>B4</b> | 4.04              | <b>C4</b> | 3.87              | <b>D4</b> | 4.48              |
| <b>A5</b>                         | 3.50              | <b>B5</b> | 3.93              | <b>C5</b> | 3.73              | <b>D5</b> | 4.43              |
| <b>A6</b>                         | 3.39              | <b>B6</b> | 3.84              | <b>C6</b> | 3.62              | <b>D6</b> | 4.40              |
| <b>A7</b>                         | 3.31              | <b>B7</b> | 3.79              | <b>C7</b> | 3.56              | <b>D7</b> | 4.38              |
| <b>A8</b>                         | 3.25              | <b>B8</b> | 3.74              | <b>C8</b> | 3.51              | <b>D8</b> | 4.32              |
| <b>A9</b>                         | 3.21              | <b>B9</b> | 3.71              | <b>C9</b> | 3.47              | <b>D9</b> | 4.14              |
| [n]benzocyclopentadienone systems |                   |           |                   |           |                   |           |                   |
| <b>A1</b>                         | 3.99              |           |                   |           |                   |           |                   |
| <b>A2</b>                         | 3.17              | <b>B2</b> | 3.44              | <b>C2</b> | 3.45              | <b>D2</b> | 3.68              |
| <b>A3</b>                         | 2.79              | <b>B3</b> | 3.13              | <b>C3</b> | 3.23              | <b>D3</b> | 3.42              |
| <b>A4</b>                         | 2.51              | <b>B4</b> | 2.97              | <b>C4</b> | 3.14              | <b>D4</b> | 3.39              |
| <b>A5</b>                         | 2.46              | <b>B5</b> | 2.87              | <b>C5</b> | 3.09              | <b>D5</b> | 3.28              |
| <b>A6</b>                         | 2.38              | <b>B6</b> | 2.81              | <b>C6</b> | 3.06              | <b>D6</b> | 3.27              |
| <b>A7</b>                         | 2.33              | <b>B7</b> | 2.77              | <b>C7</b> | 3.06              | <b>D7</b> | 3.21              |
| <b>A8</b>                         | 2.29              | <b>B8</b> | 2.74              | <b>C8</b> | 3.05              | <b>D8</b> | 3.22              |
| <b>A9</b>                         | 2.26              | <b>B9</b> | 2.72              | <b>C9</b> | 3.02              | <b>D9</b> | 3.19              |

**Table S4.** The optimized Cartesian coordinates of the oxa[4]circulene in the ground singlet state calculated at the B3LYP/6-31(d) level of theory

| Center Number | Atomic Number | Coordinates (Angstroms) |           |           |
|---------------|---------------|-------------------------|-----------|-----------|
|               |               | X                       | Y         | Z         |
| 1             | 6             | 0.807697                | 1.204138  | -0.731835 |
| 2             | 6             | 0.807697                | 1.204138  | 0.731835  |
| 3             | 6             | -0.671432               | 1.285107  | -0.731835 |
| 4             | 6             | -0.671432               | 1.285107  | 0.731835  |
| 5             | 6             | 1.122738                | 0.042302  | 1.379954  |
| 6             | 6             | 1.122738                | 0.042302  | -1.379954 |
| 7             | 6             | 1.963377                | -0.921491 | -0.693797 |
| 8             | 6             | 1.963377                | -0.921491 | 0.693797  |
| 9             | 8             | -0.023788               | -0.434572 | 2.078264  |
| 10            | 6             | -1.111411               | 0.164601  | 1.379954  |
| 11            | 6             | -1.111411               | 0.164601  | -1.379954 |
| 12            | 6             | -2.052230               | -0.701673 | -0.693797 |
| 13            | 6             | -2.052230               | -0.701673 | 0.693797  |
| 14            | 8             | -0.023788               | -0.434572 | -2.078264 |
| 15            | 1             | 2.425333                | -1.755756 | -1.215229 |
| 16            | 1             | 2.425333                | -1.755756 | 1.215229  |
| 17            | 1             | -2.602489               | -1.480528 | -1.215229 |
| 18            | 1             | -2.602489               | -1.480528 | 1.215229  |

**Table S5.** The optimized Cartesian coordinates of the oxa[6]circulene in the ground singlet state calculated at the B3LYP/6-31(d) level of theory

| Center Number | Atomic Number | Coordinates (Angstroms) |           |           |
|---------------|---------------|-------------------------|-----------|-----------|
|               |               | X                       | Y         | Z         |
| 1             | 6             | 1.301785                | 0.550066  | -0.880875 |
| 2             | 6             | 0.191301                | 1.400229  | -0.880897 |
| 3             | 6             | 1.116983                | -0.865786 | -0.880897 |
| 4             | 6             | -0.174521               | -1.402412 | -0.880875 |
| 5             | 6             | -1.308285               | -0.534443 | -0.880897 |
| 6             | 6             | -1.127264               | 0.852346  | -0.880875 |
| 7             | 6             | 2.393946                | 0.817232  | -0.065232 |
| 8             | 6             | 0.164040                | 2.524167  | -0.065117 |
| 9             | 6             | 2.103972                | -1.404146 | -0.065117 |
| 10            | 6             | -0.489229               | -2.481834 | -0.065232 |
| 11            | 6             | -2.268012               | -1.120021 | -0.065117 |
| 12            | 6             | -1.904716               | 1.664602  | -0.065232 |
| 13            | 6             | -3.196090               | -0.297334 | 0.604655  |
| 14            | 6             | -3.012824               | 1.107520  | 0.604530  |
| 15            | 6             | 1.340546                | 2.916562  | 0.604655  |
| 16            | 6             | 2.465552                | 2.055422  | 0.604530  |
| 17            | 6             | 0.547272                | -3.162942 | 0.604530  |
| 18            | 6             | 1.855544                | -2.619228 | 0.604655  |
| 19            | 8             | 3.010527                | -0.392826 | 0.305640  |
| 20            | 8             | -1.165066               | 2.803606  | 0.305640  |
| 21            | 8             | -1.845461               | -2.410780 | 0.305640  |
| 22            | 1             | -3.953328               | -0.722708 | 1.255407  |
| 23            | 1             | -3.635693               | 1.712863  | 1.255214  |
| 24            | 1             | 1.350780                | 3.785037  | 1.255407  |
| 25            | 1             | 3.301229                | 2.292170  | 1.255214  |
| 26            | 1             | 0.334463                | -4.005034 | 1.255214  |
| 27            | 1             | 2.602548                | -3.062329 | 1.255407  |

**Table S6.** The optimized Cartesian coordinates of the oxa[8]circulene in the ground singlet state calculated at the B3LYP/6-31(d) level of theory

| Center Number | Atomic Number | Coordinates (Angstroms) |           |          |
|---------------|---------------|-------------------------|-----------|----------|
|               |               | X                       | Y         | Z        |
| 1             | 6             | 0.701413                | 4.166565  | 0.000000 |
| 2             | 6             | -0.701413               | 4.166565  | 0.000000 |
| 3             | 6             | -1.372083               | 2.937192  | 0.000000 |
| 4             | 6             | -0.698099               | 1.710140  | 0.000000 |
| 5             | 6             | 0.698099                | 1.710140  | 0.000000 |
| 6             | 6             | 1.372083                | 2.937192  | 0.000000 |
| 7             | 8             | 2.743680                | 2.743680  | 0.000000 |
| 8             | 6             | 2.937192                | 1.372083  | 0.000000 |
| 9             | 6             | 1.710140                | 0.698099  | 0.000000 |
| 10            | 6             | 4.166565                | 0.701413  | 0.000000 |
| 11            | 6             | 4.166565                | -0.701413 | 0.000000 |
| 12            | 1             | 1.252684                | 5.100490  | 0.000000 |
| 13            | 1             | -1.252684               | 5.100490  | 0.000000 |
| 14            | 1             | 5.100490                | 1.252684  | 0.000000 |
| 15            | 1             | 5.100490                | -1.252684 | 0.000000 |
| 16            | 6             | 1.710140                | -0.698099 | 0.000000 |
| 17            | 6             | 2.937192                | -1.372083 | 0.000000 |
| 18            | 8             | 2.743680                | -2.743680 | 0.000000 |
| 19            | 6             | 1.372083                | -2.937192 | 0.000000 |
| 20            | 6             | 0.698099                | -1.710140 | 0.000000 |
| 21            | 6             | 0.701413                | -4.166565 | 0.000000 |
| 22            | 6             | -0.701413               | -4.166565 | 0.000000 |
| 23            | 1             | 1.252684                | -5.100490 | 0.000000 |
| 24            | 1             | -1.252684               | -5.100490 | 0.000000 |
| 25            | 6             | -0.698099               | -1.710140 | 0.000000 |
| 26            | 6             | -1.372083               | -2.937192 | 0.000000 |
| 27            | 8             | -2.743680               | -2.743680 | 0.000000 |
| 28            | 6             | -2.937192               | -1.372083 | 0.000000 |
| 29            | 6             | -1.710140               | -0.698099 | 0.000000 |
| 30            | 6             | -4.166565               | -0.701413 | 0.000000 |
| 31            | 6             | -4.166565               | 0.701413  | 0.000000 |
| 32            | 6             | -2.937192               | 1.372083  | 0.000000 |
| 33            | 6             | -1.710140               | 0.698099  | 0.000000 |
| 34            | 1             | -5.100490               | -1.252684 | 0.000000 |
| 35            | 1             | -5.100490               | 1.252684  | 0.000000 |
| 36            | 8             | -2.743680               | 2.743680  | 0.000000 |

**Table S7.** The optimized Cartesian coordinates of the oxa[10]circulene in the ground singlet state calculated at the B3LYP/6-31(d) level of theory

| Center Number | Atomic Number | Coordinates (Angstroms) |           |           |
|---------------|---------------|-------------------------|-----------|-----------|
|               |               | X                       | Y         | Z         |
| 1             | 6             | 0.725059                | -0.157754 | -2.206279 |
| 2             | 6             | 1.881594                | -0.193089 | -1.339108 |
| 3             | 6             | 2.312084                | 0.233475  | 0.013689  |
| 4             | 6             | 1.801994                | 0.593810  | 1.315692  |
| 5             | 6             | -0.725059               | 0.157754  | -2.206279 |
| 6             | 6             | -1.881594               | 0.193089  | -1.339108 |
| 7             | 6             | -0.644200               | -0.324569 | 2.197262  |
| 8             | 6             | -2.312084               | -0.233475 | 0.013689  |
| 9             | 6             | -1.801994               | -0.593810 | 1.315692  |
| 10            | 6             | 0.644200                | 0.324569  | 2.197262  |
| 11            | 6             | -2.769825               | -1.164436 | 2.186848  |

|    |   |           |           |           |
|----|---|-----------|-----------|-----------|
| 12 | 8 | -2.307069 | -1.327458 | 3.453147  |
| 13 | 6 | -1.093888 | -0.720605 | 3.485175  |
| 14 | 6 | -0.555054 | -0.405132 | 4.730776  |
| 15 | 6 | 0.555054  | 0.405132  | 4.730776  |
| 16 | 6 | 1.093888  | 0.720605  | 3.485175  |
| 17 | 8 | 2.307069  | 1.327458  | 3.453147  |
| 18 | 6 | 2.769825  | 1.164436  | 2.186848  |
| 19 | 6 | 4.131396  | 1.364042  | 1.970969  |
| 20 | 6 | 4.643236  | 0.851822  | 0.803192  |
| 21 | 6 | 3.729505  | 0.282574  | -0.079661 |
| 22 | 6 | -3.729505 | -0.282574 | -0.079661 |
| 23 | 6 | -4.643236 | -0.851822 | 0.803192  |
| 24 | 6 | -4.131396 | -1.364042 | 1.970969  |
| 25 | 6 | -3.104428 | 0.478623  | -2.009303 |
| 26 | 8 | -4.196635 | 0.229263  | -1.243998 |
| 27 | 6 | -3.318533 | 0.816374  | -3.342047 |
| 28 | 6 | -2.232024 | 0.711602  | -4.176275 |
| 29 | 6 | -1.035222 | 0.319397  | -3.585729 |
| 30 | 8 | 0.000000  | 0.000000  | -4.399440 |
| 31 | 6 | 1.035222  | -0.319397 | -3.585729 |
| 32 | 6 | 2.232024  | -0.711602 | -4.176275 |
| 33 | 6 | 3.318533  | -0.816374 | -3.342047 |
| 34 | 6 | 3.104428  | -0.478623 | -2.009303 |
| 35 | 8 | 4.196635  | -0.229263 | -1.243998 |
| 36 | 1 | -1.049739 | -0.743289 | 5.633989  |
| 37 | 1 | 1.049739  | 0.743289  | 5.633989  |
| 38 | 1 | 4.742713  | 1.805258  | 2.749737  |
| 39 | 1 | 5.696966  | 0.873203  | 0.550089  |
| 40 | 1 | -5.696966 | -0.873203 | 0.550089  |
| 41 | 1 | -4.742713 | -1.805258 | 2.749737  |
| 42 | 1 | -4.321039 | 1.038533  | -3.689180 |
| 43 | 1 | -2.284195 | 0.853589  | -5.249581 |
| 44 | 1 | 2.284195  | -0.853589 | -5.249581 |
| 45 | 1 | 4.321039  | -1.038533 | -3.689180 |

**Table S8.** The optimized Cartesian coordinates of the oxa[12]circulene in the ground singlet state calculated at the B3LYP/6-31(d) level of theory

| Center<br>Number | Atomic<br>Number | Coordinates (Angstroms) |           |           |
|------------------|------------------|-------------------------|-----------|-----------|
|                  |                  | X                       | Y         | Z         |
| 1                | 6                | 2.246534                | -0.345688 | 0.933092  |
| 2                | 6                | 1.974873                | 1.064613  | 0.981162  |
| 3                | 6                | -2.044941               | 1.418528  | -0.044737 |
| 4                | 6                | -2.246294               | 0.345671  | 0.933297  |
| 5                | 6                | -1.974668               | -1.064628 | 0.981280  |
| 6                | 6                | 2.045089                | -1.418561 | -0.044925 |
| 7                | 6                | 1.075452                | -1.915613 | -0.978333 |
| 8                | 6                | -0.371659               | -2.188256 | -0.931177 |
| 9                | 6                | -1.408582               | -2.044705 | 0.049489  |
| 10               | 6                | -1.075393               | 1.915597  | -0.978224 |
| 11               | 6                | 0.371707                | 2.188339  | -0.931108 |
| 12               | 6                | 1.408720                | 2.044758  | 0.049455  |
| 13               | 6                | 2.857582                | 1.818860  | 1.791990  |
| 14               | 6                | 3.766966                | 1.322771  | 2.726554  |
| 15               | 6                | 4.038690                | -0.032834 | 2.668800  |
| 16               | 6                | 3.369282                | -0.764417 | 1.687883  |
| 17               | 8                | 3.934990                | -1.901674 | 1.178293  |
| 18               | 6                | 3.212808                | -2.206229 | 0.060444  |
| 19               | 6                | 2.200657                | 3.198379  | 0.237627  |
| 20               | 8                | 2.959726                | 3.117479  | 1.369854  |

|    |   |           |           |           |
|----|---|-----------|-----------|-----------|
| 21 | 6 | 0.559796  | 3.238668  | -1.855520 |
| 22 | 6 | 1.552393  | 4.225041  | -1.799667 |
| 23 | 6 | 2.344840  | 4.253624  | -0.666766 |
| 24 | 6 | -1.572716 | 2.826262  | -1.936254 |
| 25 | 8 | -0.565564 | 3.477534  | -2.600805 |
| 26 | 6 | -2.861328 | 3.372582  | -1.973409 |
| 27 | 6 | -3.681620 | 3.115408  | -0.890153 |
| 28 | 6 | -3.212785 | 2.205997  | 0.060524  |
| 29 | 8 | -3.934885 | 1.901530  | 1.178444  |
| 30 | 6 | -3.369047 | 0.764365  | 1.688100  |
| 31 | 6 | -4.038409 | 0.032748  | 2.669023  |
| 32 | 6 | -3.766732 | -1.322866 | 2.726661  |
| 33 | 6 | -2.857419 | -1.818914 | 1.792013  |
| 34 | 6 | -2.200779 | -3.198187 | 0.237350  |
| 35 | 8 | -2.959776 | -3.117428 | 1.369616  |
| 36 | 6 | -2.345176 | -4.253178 | -0.667330 |
| 37 | 6 | -0.559961 | -3.238298 | -1.855873 |
| 38 | 6 | -1.552748 | -4.224465 | -1.800242 |
| 39 | 8 | 0.565393  | -3.477292 | -2.601079 |
| 40 | 6 | 1.572635  | -2.826445 | -1.936226 |
| 41 | 6 | 3.681461  | -3.115925 | -0.890034 |
| 42 | 6 | 2.861112  | -3.373147 | -1.973222 |
| 43 | 1 | 4.348150  | 2.002664  | 3.339524  |
| 44 | 1 | 4.845244  | -0.485185 | 3.235021  |
| 45 | 1 | 1.571772  | 5.015227  | -2.541845 |
| 46 | 1 | 3.060235  | 5.045252  | -0.474360 |
| 47 | 1 | -3.120023 | 4.096847  | -2.737738 |
| 48 | 1 | -4.646555 | 3.592901  | -0.762160 |
| 49 | 1 | -4.844969 | 0.485065  | 3.235259  |
| 50 | 1 | -4.347956 | -2.002790 | 3.339558  |
| 51 | 1 | -3.060709 | -5.044726 | -0.475117 |
| 52 | 1 | -1.572285 | -5.014484 | -2.542594 |
| 53 | 1 | 4.646317  | -3.593557 | -0.761953 |
| 54 | 1 | 3.119683  | -4.097535 | -2.737474 |

**Table S9.** The optimized Cartesian coordinates of the oxa[14]circulene in the ground singlet state calculated at the B3LYP/6-31(d) level of theory

| Center<br>Number | Atomic<br>Number | Coordinates (Angstroms) |           |           |
|------------------|------------------|-------------------------|-----------|-----------|
|                  |                  | X                       | Y         | Z         |
| 1                | 6                | 1.499899                | 1.098400  | -1.544440 |
| 2                | 6                | 2.197097                | -0.091718 | -1.164407 |
| 3                | 6                | -0.501613               | -2.410168 | 0.614117  |
| 4                | 6                | -0.961984               | -2.214987 | -0.750130 |
| 5                | 6                | -1.448629               | -1.133178 | -1.546298 |
| 6                | 6                | 0.954077                | 2.191241  | -0.742023 |
| 7                | 6                | 0.499408                | 2.393427  | 0.592405  |
| 8                | 6                | -0.495496               | 1.837563  | 1.504968  |
| 9                | 6                | -2.150230               | 0.098573  | -1.176210 |
| 10               | 6                | 0.437825                | -1.817993 | 1.511395  |
| 11               | 6                | 1.724854                | -1.157531 | 1.275915  |
| 12               | 6                | 2.432676                | -0.767803 | 0.101782  |
| 13               | 6                | 3.311297                | -0.426344 | -1.963673 |
| 14               | 6                | 1.919079                | 1.706398  | -2.746695 |
| 15               | 8                | 1.681118                | 3.063012  | -2.741720 |
| 16               | 6                | 1.287537                | 3.355651  | -1.457816 |
| 17               | 6                | 3.771750                | -1.198401 | 0.034063  |
| 18               | 8                | 4.262586                | -1.109817 | -1.243766 |
| 19               | 6                | 2.513468                | -1.508605 | 2.387422  |
| 20               | 6                | 0.576011                | -2.438182 | 2.768501  |

|    |   |           |           |           |
|----|---|-----------|-----------|-----------|
| 21 | 8 | 1.761401  | -2.095127 | 3.380295  |
| 22 | 6 | -0.909680 | -3.717886 | 0.947387  |
| 23 | 8 | -1.349347 | -4.403466 | -0.156901 |
| 24 | 6 | -1.331939 | -3.502131 | -1.192022 |
| 25 | 6 | -1.960165 | -1.473048 | -2.814570 |
| 26 | 6 | -3.075130 | 0.305878  | -2.216267 |
| 27 | 8 | -2.816131 | -0.507177 | -3.296118 |
| 28 | 6 | -0.423857 | 2.649916  | 2.656939  |
| 29 | 8 | 0.495507  | 3.664203  | 2.507832  |
| 30 | 6 | 0.896957  | 3.600876  | 1.195588  |
| 31 | 6 | -2.434598 | 0.757136  | 0.054856  |
| 32 | 6 | -3.779198 | 1.128908  | 0.244693  |
| 33 | 6 | -1.754452 | 1.201922  | 1.262531  |
| 34 | 6 | -2.793145 | 1.541987  | 2.156143  |
| 35 | 8 | -4.026241 | 1.466779  | 1.551166  |
| 36 | 6 | -4.323409 | 0.925584  | -2.067106 |
| 37 | 6 | -4.719341 | 1.271170  | -0.781024 |
| 38 | 6 | -2.625496 | 2.148929  | 3.402255  |
| 39 | 6 | -1.384127 | 2.711358  | 3.670873  |
| 40 | 6 | 1.387770  | 4.713775  | 0.502254  |
| 41 | 6 | 1.501101  | 4.613068  | -0.879318 |
| 42 | 6 | 3.564110  | 0.062805  | -3.246627 |
| 43 | 6 | 2.818966  | 1.157313  | -3.665931 |
| 44 | 6 | 3.906781  | -1.661433 | 2.367410  |
| 45 | 6 | 4.543236  | -1.582066 | 1.135317  |
| 46 | 6 | -0.828533 | -4.284046 | 2.221881  |
| 47 | 6 | -0.111690 | -3.586212 | 3.184714  |
| 48 | 6 | -2.005677 | -2.766649 | -3.350843 |
| 49 | 6 | -1.735453 | -3.822155 | -2.490198 |
| 50 | 1 | -5.001860 | 0.991719  | -2.910518 |
| 51 | 1 | -5.712497 | 1.651161  | -0.568841 |
| 52 | 1 | -3.475245 | 2.309793  | 4.056552  |
| 53 | 1 | -1.222359 | 3.336697  | 4.542055  |
| 54 | 1 | 1.594172  | 5.639081  | 1.028629  |
| 55 | 1 | 1.834328  | 5.445527  | -1.489120 |
| 56 | 1 | 4.404399  | -0.307475 | -3.823540 |
| 57 | 1 | 3.057353  | 1.687240  | -4.581655 |
| 58 | 1 | 4.430580  | -1.985548 | 3.259952  |
| 59 | 1 | 5.596364  | -1.811942 | 1.017683  |
| 60 | 1 | -1.250431 | -5.262995 | 2.420564  |
| 61 | 1 | 0.073240  | -4.003682 | 4.168433  |
| 62 | 1 | -2.425059 | -2.932156 | -4.337219 |
| 63 | 1 | -1.914477 | -4.852704 | -2.776136 |

**Table S10.** The optimized Cartesian coordinates of the oxa[16]circulene in the ground singlet state calculated at the B3LYP/6-31(d) level of theory

| Center Number | Atomic Number | Coordinates (Angstroms) |           |           |
|---------------|---------------|-------------------------|-----------|-----------|
|               |               | X                       | Y         | Z         |
| 1             | 6             | 1.010530                | -1.737294 | -1.604297 |
| 2             | 6             | -0.376089               | -2.050982 | -1.606467 |
| 3             | 6             | 1.840379                | 0.540766  | 1.509644  |
| 4             | 6             | 1.010545                | 1.737286  | 1.604292  |
| 5             | 6             | -0.376071               | 2.050984  | 1.606463  |
| 6             | 6             | 1.576826                | 0.842604  | -1.751062 |
| 7             | 6             | 0.376029                | 1.606496  | -2.050828 |
| 8             | 6             | -1.010607               | 1.604418  | -1.737230 |
| 9             | 6             | -1.576918               | 1.751301  | 0.842630  |
| 10            | 6             | 0.376023                | -1.606502 | 2.050829  |
| 11            | 6             | -1.010613               | -1.604416 | 1.737232  |

|    |   |           |           |           |
|----|---|-----------|-----------|-----------|
| 12 | 6 | -1.840493 | -1.509864 | 0.540748  |
| 13 | 6 | -0.782064 | -3.014650 | -2.549392 |
| 14 | 6 | 1.865303  | -2.723871 | -2.130505 |
| 15 | 6 | -3.150225 | -1.790825 | 0.985504  |
| 16 | 6 | -1.865310 | -2.130731 | 2.723827  |
| 17 | 6 | 0.782101  | -2.549477 | 3.014415  |
| 18 | 6 | 3.150146  | 0.985489  | 1.790488  |
| 19 | 8 | 3.182489  | 2.334111  | 2.066300  |
| 20 | 6 | 1.865326  | 2.723858  | 2.130494  |
| 21 | 6 | -0.782036 | 3.014658  | 2.549387  |
| 22 | 6 | -2.627597 | 2.344372  | 1.575706  |
| 23 | 8 | -2.151818 | 3.080923  | 2.636449  |
| 24 | 6 | -1.865302 | 2.130747  | -2.723820 |
| 25 | 6 | 0.782114  | 2.549474  | -3.014410 |
| 26 | 8 | -3.182491 | -2.066662 | 2.334124  |
| 27 | 8 | 2.151904  | 2.636498  | -3.080530 |
| 28 | 6 | -3.150217 | 1.790842  | -0.985498 |
| 29 | 8 | -3.182484 | 2.066684  | -2.334117 |
| 30 | 6 | -1.840486 | 1.509871  | -0.540746 |
| 31 | 6 | 1.840372  | -0.540780 | -1.509645 |
| 32 | 8 | 3.182468  | -2.334132 | -2.066316 |
| 33 | 6 | 3.150136  | -0.985511 | -1.790496 |
| 34 | 6 | 1.576824  | -0.842616 | 1.751063  |
| 35 | 6 | 2.627565  | -1.575699 | 2.344010  |
| 36 | 8 | 2.151891  | -2.636513 | 3.080533  |
| 37 | 6 | -1.576931 | -1.751294 | -0.842628 |
| 38 | 6 | -2.627616 | -2.344357 | -1.575702 |
| 39 | 8 | -2.151846 | -3.080908 | -2.636449 |
| 40 | 6 | 3.959723  | -1.165476 | 2.412748  |
| 41 | 6 | 4.234072  | 0.162910  | 2.106684  |
| 42 | 6 | 1.439573  | 3.816951  | 2.894255  |
| 43 | 6 | -3.959736 | 2.413249  | 1.165450  |
| 44 | 6 | -4.234104 | 2.107162  | -0.162933 |
| 45 | 6 | -0.080834 | 3.181935  | -3.914793 |
| 46 | 6 | 4.234067  | -0.162938 | -2.106689 |
| 47 | 6 | 3.959727  | 1.165451  | -2.412746 |
| 48 | 6 | 0.080989  | -3.914982 | -3.181798 |
| 49 | 6 | -4.234117 | -2.107138 | 0.162943  |
| 50 | 6 | -3.959754 | -2.413228 | -1.165441 |
| 51 | 6 | -1.439426 | -2.894484 | 3.816871  |
| 52 | 6 | -0.080850 | -3.181929 | 3.914802  |
| 53 | 1 | 4.717587  | -1.820054 | 2.828925  |
| 54 | 1 | 5.215689  | 0.591578  | 2.276463  |
| 55 | 1 | -4.717569 | 2.829556  | 1.819982  |
| 56 | 1 | -5.215697 | 2.277061  | -0.591610 |
| 57 | 1 | 0.311119  | 3.834703  | -4.686881 |
| 58 | 1 | 5.215681  | -0.591612 | -2.276470 |
| 59 | 1 | 4.717596  | 1.820027  | -2.828919 |
| 60 | 1 | -5.215709 | -2.277030 | 0.591623  |
| 61 | 1 | -4.717593 | -2.829530 | -1.819970 |
| 62 | 1 | -2.164509 | -3.327725 | 4.496958  |
| 63 | 1 | 0.311099  | -3.834697 | 4.686891  |
| 64 | 6 | 1.439540  | -3.816956 | -2.894272 |
| 65 | 6 | -1.439412 | 2.894502  | -3.816861 |
| 66 | 1 | -2.164492 | 3.327751  | -4.496946 |
| 67 | 6 | 0.081024  | 3.914988  | 3.181785  |
| 68 | 1 | 2.164740  | 4.497011  | 3.327397  |
| 69 | 1 | -0.310836 | 4.687144  | 3.834526  |
| 70 | 1 | -0.310878 | -4.687132 | -3.834542 |
| 71 | 1 | 2.164700  | -4.497019 | -3.327421 |
| 72 | 6 | 2.627572  | 1.575681  | -2.344008 |

---

**Table S11.** The optimized Cartesian coordinates of the oxa[18]circulene in the ground singlet state calculated at the B3LYP/6-31(d) level of theory

| Center Number | Atomic Number | Coordinates (Angstroms) |           |           |
|---------------|---------------|-------------------------|-----------|-----------|
|               |               | X                       | Y         | Z         |
| 1             | 6             | -0.729474               | 0.012766  | 2.726912  |
| 2             | 6             | 0.729474                | -0.012766 | 2.726912  |
| 3             | 6             | -1.839644               | -0.395815 | -1.878882 |
| 4             | 6             | -0.715061               | -0.015096 | -2.738750 |
| 5             | 6             | 0.715061                | 0.015096  | -2.738750 |
| 6             | 6             | -2.080932               | 1.328221  | 0.780637  |
| 7             | 6             | -1.374437               | 2.389562  | 0.124125  |
| 8             | 6             | 0.000000                | 2.870193  | 0.000632  |
| 9             | 6             | 1.839644                | 0.395815  | -1.878882 |
| 10            | 6             | 0.000000                | -2.870193 | 0.000632  |
| 11            | 6             | 1.374437                | -2.389562 | 0.124125  |
| 12            | 6             | 2.080932                | -1.328221 | 0.780637  |
| 13            | 6             | 1.080035                | 0.165304  | 4.086035  |
| 14            | 6             | -1.080035               | -0.165304 | 4.086035  |
| 15            | 6             | -3.491902               | 1.418679  | 0.724776  |
| 16            | 6             | 3.491902                | -1.418679 | 0.724776  |
| 17            | 6             | 2.165724                | -3.515164 | -0.216580 |
| 18            | 6             | 0.124552                | -4.276313 | -0.056300 |
| 19            | 8             | 1.414656                | -4.657032 | -0.310165 |
| 20            | 6             | -2.985471               | -0.026405 | -2.627628 |
| 21            | 8             | -2.663346               | 0.409117  | -3.885110 |
| 22            | 6             | -1.307322               | 0.263366  | -3.990152 |
| 23            | 6             | 1.307322                | -0.263366 | -3.990152 |
| 24            | 6             | 2.985471                | 0.026405  | -2.627628 |
| 25            | 8             | 2.663346                | -0.409117 | -3.885110 |
| 26            | 6             | -0.124552               | 4.276313  | -0.056300 |
| 27            | 8             | -1.414656               | 4.657032  | -0.310165 |
| 28            | 6             | -2.165724               | 3.515164  | -0.216580 |
| 29            | 8             | 0.000000                | 0.000000  | 4.911762  |
| 30            | 6             | 2.334536                | 3.306368  | 0.287425  |
| 31            | 6             | -1.819624               | 0.364036  | 1.866642  |
| 32            | 6             | -3.100800               | 0.043277  | 2.369192  |
| 33            | 8             | -4.103763               | 0.547945  | 1.586263  |
| 34            | 6             | -1.341165               | -2.385307 | -0.110644 |
| 35            | 6             | -2.334536               | -3.306368 | 0.287425  |
| 36            | 6             | 1.819624                | -0.364036 | 1.866642  |
| 37            | 6             | 3.100800                | -0.043277 | 2.369192  |
| 38            | 8             | 4.103763                | -0.547945 | 1.586263  |
| 39            | 6             | -3.443941               | -1.642364 | -0.576196 |
| 40            | 8             | -3.592951               | -2.782874 | 0.165644  |
| 41            | 6             | -2.082588               | -1.319784 | -0.803033 |
| 42            | 6             | 3.443941                | 1.642364  | -0.576196 |
| 43            | 8             | 3.592951                | 2.782874  | 0.165644  |
| 44            | 6             | 2.082588                | 1.319784  | -0.803033 |
| 45            | 6             | 1.341165                | 2.385307  | -0.110644 |
| 46            | 6             | -4.554758               | -1.077412 | -1.200362 |
| 47            | 6             | -4.316595               | -0.245926 | -2.280775 |
| 48            | 6             | -0.668099               | 0.185544  | -5.230319 |
| 49            | 6             | 0.668099                | -0.185544 | -5.230319 |
| 50            | 6             | -0.890015               | -5.193311 | 0.222280  |
| 51            | 6             | -2.148126               | -4.676991 | 0.493310  |
| 52            | 6             | 4.240121                | -2.427498 | 0.117176  |
| 53            | 6             | 3.552765                | -3.544485 | -0.329739 |
| 54            | 6             | 2.353469                | 0.464593  | 4.567106  |
| 55            | 6             | 3.393515                | 0.430846  | 3.651443  |
| 56            | 6             | -3.393515               | -0.430846 | 3.651443  |
| 57            | 6             | -2.353469               | -0.464593 | 4.567106  |



|    |   |           |           |           |
|----|---|-----------|-----------|-----------|
| 58 | 6 | -3.552765 | 3.544485  | -0.329739 |
| 59 | 6 | -4.240121 | 2.427498  | 0.117176  |
| 60 | 6 | 2.148126  | 4.676991  | 0.493310  |
| 61 | 6 | 0.890015  | 5.193311  | 0.222280  |
| 62 | 6 | 4.316595  | 0.245926  | -2.280775 |
| 63 | 6 | 4.554758  | 1.077412  | -1.200362 |
| 64 | 1 | -5.553182 | -1.393468 | -0.920111 |
| 65 | 1 | -5.114520 | 0.126409  | -2.913447 |
| 66 | 1 | -1.230051 | 0.335080  | -6.145393 |
| 67 | 1 | 1.230051  | -0.335080 | -6.145393 |
| 68 | 1 | -0.680346 | -6.256808 | 0.244877  |
| 69 | 1 | -2.995115 | -5.310073 | 0.732916  |
| 70 | 1 | 5.323212  | -2.387998 | 0.143336  |
| 71 | 1 | 4.059487  | -4.440443 | -0.670303 |
| 72 | 1 | 2.511592  | 0.676513  | 5.618574  |
| 73 | 1 | 4.423206  | 0.610745  | 3.939463  |
| 74 | 1 | -4.423206 | -0.610745 | 3.939463  |
| 75 | 1 | -2.511592 | -0.676513 | 5.618574  |
| 76 | 1 | -4.059487 | 4.440443  | -0.670303 |
| 77 | 1 | -5.323212 | 2.387998  | 0.143336  |
| 78 | 1 | 2.995115  | 5.310073  | 0.732916  |
| 79 | 1 | 0.680346  | 6.256808  | 0.244877  |
| 80 | 1 | 5.114520  | -0.126409 | -2.913447 |
| 81 | 1 | 5.553182  | 1.393468  | -0.920111 |

**Table S12.** The optimized Cartesian coordinates of the oxa[20]circulene in the ground singlet state calculated at the B3LYP/6-31(d) level of theory

| Center Number | Atomic Number | Coordinates (Angstroms) |           |           |
|---------------|---------------|-------------------------|-----------|-----------|
|               |               | X                       | Y         | Z         |
| 1             | 6             | 0.325320                | 2.835042  | -1.070872 |
| 2             | 6             | 0.404093                | 3.051739  | 0.388161  |
| 3             | 6             | -0.617839               | -1.847752 | -2.091666 |
| 4             | 6             | -0.325320               | -2.835042 | -1.070872 |
| 5             | 6             | -0.199328               | -2.401605 | 1.666856  |
| 6             | 6             | 1.458742                | 0.631352  | -2.335207 |
| 7             | 6             | 2.445246                | -0.218651 | -1.689278 |
| 8             | 6             | 3.090225                | -0.414406 | -0.374198 |
| 9             | 6             | 0.695359                | -1.411836 | 2.343721  |
| 10            | 6             | -2.869791               | 0.286402  | 1.047351  |
| 11            | 6             | -1.875552               | 0.588874  | 2.109835  |
| 12            | 6             | -0.695359               | 1.411836  | 2.343721  |
| 13            | 6             | 0.660911                | 4.443913  | 0.500228  |
| 14            | 6             | 0.130633                | 4.148925  | -1.583432 |
| 15            | 6             | 1.434235                | 0.489530  | -3.749360 |
| 16            | 6             | -0.383568               | 1.586053  | 3.721194  |
| 17            | 6             | -2.540000               | 0.161834  | 3.298208  |
| 18            | 6             | -4.049599               | -0.044277 | 1.757109  |
| 19            | 8             | -3.807446               | -0.278052 | 3.073300  |
| 20            | 6             | -0.247681               | -2.270368 | -3.396454 |
| 21            | 6             | -0.130633               | -4.148925 | -1.583432 |
| 22            | 6             | -0.822898               | -3.091861 | 2.737641  |
| 23            | 6             | 0.383568                | -1.586053 | 3.721194  |
| 24            | 8             | -0.585521               | -2.510183 | 3.941748  |
| 25            | 6             | 4.409201                | -0.818319 | -0.697967 |
| 26            | 8             | 4.513943                | -1.225396 | -1.991154 |
| 27            | 6             | 3.345282                | -0.861688 | -2.587530 |
| 28            | 8             | 0.389593                | 5.110200  | -0.654645 |
| 29            | 6             | 4.049599                | 0.044277  | 1.757109  |
| 30            | 6             | 0.617839                | 1.847752  | -2.091666 |

|    |   |           |           |           |
|----|---|-----------|-----------|-----------|
| 31 | 6 | 0.247681  | 2.270368  | -3.396454 |
| 32 | 8 | 0.643294  | 1.404114  | -4.364382 |
| 33 | 6 | -3.090225 | 0.414406  | -0.374198 |
| 34 | 6 | -4.409201 | 0.818319  | -0.697967 |
| 35 | 6 | 0.199328  | 2.401605  | 1.666856  |
| 36 | 6 | 0.822898  | 3.091861  | 2.737641  |
| 37 | 8 | 0.585521  | 2.510183  | 3.941748  |
| 38 | 6 | -3.345282 | 0.861688  | -2.587530 |
| 39 | 8 | -4.513943 | 1.225396  | -1.991154 |
| 40 | 6 | -2.445246 | 0.218651  | -1.689278 |
| 41 | 6 | 2.540000  | -0.161834 | 3.298208  |
| 42 | 8 | 3.807446  | 0.278052  | 3.073300  |
| 43 | 6 | 1.875552  | -0.588874 | 2.109835  |
| 44 | 6 | 2.869791  | -0.286402 | 1.047351  |
| 45 | 6 | -5.371977 | 0.100192  | 1.328704  |
| 46 | 6 | -5.555200 | 0.660622  | 0.082428  |
| 47 | 6 | -1.022245 | 1.064987  | 4.842817  |
| 48 | 6 | -2.153525 | 0.318837  | 4.623926  |
| 49 | 6 | 1.201506  | 5.118707  | 1.591678  |
| 50 | 6 | 1.377277  | 4.374384  | 2.737501  |
| 51 | 6 | -0.247681 | 3.506780  | -3.808431 |
| 52 | 6 | -0.241031 | 4.516005  | -2.871077 |
| 53 | 6 | 3.226556  | -1.026579 | -3.962557 |
| 54 | 6 | 2.202181  | -0.337266 | -4.566217 |
| 55 | 6 | 5.371977  | -0.100192 | 1.328704  |
| 56 | 6 | 5.555200  | -0.660622 | 0.082428  |
| 57 | 6 | 1.022245  | -1.064987 | 4.842817  |
| 58 | 6 | 2.153525  | -0.318837 | 4.623926  |
| 59 | 1 | -6.187324 | -0.113767 | 2.010168  |
| 60 | 1 | -6.529183 | 0.914613  | -0.319873 |
| 61 | 1 | -0.659451 | 1.323614  | 5.830484  |
| 62 | 1 | -2.783995 | -0.062052 | 5.418883  |
| 63 | 1 | 1.459224  | 6.168853  | 1.515715  |
| 64 | 1 | 1.778516  | 4.785391  | 3.656765  |
| 65 | 1 | -0.474379 | 3.671334  | -4.855417 |
| 66 | 1 | -0.455956 | 5.551946  | -3.106971 |
| 67 | 1 | 3.968417  | -1.596341 | -4.510289 |
| 68 | 1 | 2.036376  | -0.331649 | -5.637046 |
| 69 | 1 | 6.187324  | 0.113767  | 2.010168  |
| 70 | 1 | 6.529183  | -0.914613 | -0.319873 |
| 71 | 1 | 0.659451  | -1.323614 | 5.830484  |
| 72 | 1 | 2.783995  | 0.062052  | 5.418883  |
| 73 | 6 | -0.404093 | -3.051739 | 0.388161  |
| 74 | 6 | -0.660911 | -4.443913 | 0.500228  |
| 75 | 8 | -0.389593 | -5.110200 | -0.654645 |
| 76 | 6 | -1.458742 | -0.631352 | -2.335207 |
| 77 | 6 | -1.434235 | -0.489530 | -3.749360 |
| 78 | 8 | -0.643294 | -1.404114 | -4.364382 |
| 79 | 6 | -2.202181 | 0.337266  | -4.566217 |
| 80 | 6 | -3.226556 | 1.026579  | -3.962557 |
| 81 | 1 | -2.036376 | 0.331649  | -5.637046 |
| 82 | 1 | -3.968417 | 1.596341  | -4.510289 |
| 83 | 6 | -1.377277 | -4.374384 | 2.737501  |
| 84 | 6 | -1.201506 | -5.118707 | 1.591678  |
| 85 | 6 | 0.241031  | -4.516005 | -2.871077 |
| 86 | 6 | 0.247681  | -3.506780 | -3.808431 |
| 87 | 1 | -1.778516 | -4.785391 | 3.656765  |
| 88 | 1 | -1.459224 | -6.168853 | 1.515715  |
| 89 | 1 | 0.455956  | -5.551946 | -3.106971 |
| 90 | 1 | 0.474379  | -3.671334 | -4.855417 |

---

**Table S13.** The optimized Cartesian coordinates of the oxa[22]circulene in the ground singlet state calculated at the B3LYP/6-31(d) level of theory

| Center Number | Atomic Number | Coordinates (Angstroms) |           |           |
|---------------|---------------|-------------------------|-----------|-----------|
|               |               | X                       | Y         | Z         |
| 1             | 6             | -0.728595               | -3.272354 | 0.130759  |
| 2             | 6             | 0.724524                | -3.247905 | 0.433278  |
| 3             | 6             | -2.598719               | 1.365953  | -0.945801 |
| 4             | 6             | -0.712094               | 3.267001  | -0.120818 |
| 5             | 6             | 2.597935                | 1.512699  | 0.691565  |
| 6             | 6             | -2.616871               | -1.328332 | 0.918064  |
| 7             | 6             | -2.420233               | -0.258421 | 1.920209  |
| 8             | 6             | -1.416366               | 0.374207  | 2.857351  |
| 9             | 6             | 2.372813                | 0.589664  | 1.889612  |
| 10            | 6             | 1.421395                | -0.130385 | -2.878541 |
| 11            | 6             | 2.423127                | -0.590496 | -1.843719 |
| 12            | 6             | 2.616690                | -1.469869 | -0.670717 |
| 13            | 6             | 0.977778                | -4.587404 | 0.849300  |
| 14            | 6             | -0.983579               | -4.662639 | -0.053484 |
| 15            | 6             | -3.991467               | -1.518924 | 0.580663  |
| 16            | 6             | 3.990202                | -1.599967 | -0.301818 |
| 17            | 6             | 3.652758                | -0.096780 | -2.379259 |
| 18            | 6             | 2.224863                | 0.423428  | -3.908803 |
| 19            | 8             | 3.516051                | 0.578667  | -3.541043 |
| 20            | 6             | -4.014744               | 1.356479  | -0.784499 |
| 21            | 6             | -1.136520               | 4.565876  | 0.249991  |
| 22            | 6             | 4.013497                | 1.477239  | 0.530761  |
| 23            | 6             | 3.693725                | 0.167649  | 2.220178  |
| 24            | 8             | 4.639881                | 0.654029  | 1.393674  |
| 25            | 6             | -2.217566               | 1.101015  | 3.775734  |
| 26            | 8             | -3.508860               | 1.192335  | 3.387566  |
| 27            | 6             | -3.648148               | 0.323793  | 2.362320  |
| 28            | 8             | -0.003387               | -5.443139 | 0.467231  |
| 29            | 6             | 0.047136                | 0.301962  | 4.739442  |
| 30            | 6             | -1.948288               | -2.470622 | 0.172027  |
| 31            | 6             | -3.024987               | -3.137836 | -0.472463 |
| 32            | 8             | -4.209621               | -2.509623 | -0.310155 |
| 33            | 6             | 0.035083                | -0.295089 | -3.320851 |
| 34            | 6             | -0.040773               | -0.526716 | -4.720529 |
| 35            | 6             | 1.945331                | -2.466193 | 0.258995  |
| 36            | 6             | 3.019858                | -3.014438 | 1.010260  |
| 37            | 8             | 4.205383                | -2.423600 | 0.745926  |
| 38            | 6             | -2.008916               | -1.029244 | -3.993967 |
| 39            | 8             | -1.208366               | -1.103756 | -5.085554 |
| 40            | 6             | -1.396626               | -0.353564 | -2.891793 |
| 41            | 6             | 2.015310                | -0.317576 | 4.109677  |
| 42            | 8             | 1.215298                | -0.202492 | 5.198255  |
| 43            | 6             | 1.401410                | 0.155930  | 2.907575  |
| 44            | 6             | -0.029883               | 0.287000  | 3.320973  |
| 45            | 6             | 1.969770                | 0.527269  | -5.281273 |
| 46            | 6             | 0.829529                | -0.092869 | -5.720386 |
| 47            | 6             | 5.147875                | -1.108733 | -0.895848 |
| 48            | 6             | 4.970314                | -0.317087 | -1.990605 |
| 49            | 6             | 2.051569                | -5.074849 | 1.583959  |
| 50            | 6             | 3.095027                | -4.198683 | 1.747040  |
| 51            | 6             | -3.102380               | -4.429010 | -0.999218 |
| 52            | 6             | -2.058870               | -5.266053 | -0.693576 |
| 53            | 6             | -4.966865               | 0.039261  | 2.022438  |
| 54            | 6             | -5.147559               | -0.931720 | 1.083765  |
| 55            | 6             | -0.821740               | 0.904946  | 5.648996  |
| 56            | 6             | -1.960869               | 1.441809  | 5.109003  |
| 57            | 6             | 4.183823                | -0.557287 | 3.304861  |

|    |   |           |           |           |
|----|---|-----------|-----------|-----------|
| 58 | 6 | 3.306152  | -0.778204 | 4.329594  |
| 59 | 1 | 2.734129  | 0.925855  | -5.938028 |
| 60 | 1 | 0.567610  | -0.220779 | -6.764251 |
| 61 | 1 | 6.112031  | -1.377580 | -0.481679 |
| 62 | 1 | 5.775517  | 0.108365  | -2.577417 |
| 63 | 1 | 2.051060  | -6.094643 | 1.951055  |
| 64 | 1 | 4.020054  | -4.452885 | 2.251239  |
| 65 | 1 | -4.028684 | -4.763125 | -1.451786 |
| 66 | 1 | -2.059570 | -6.333084 | -0.883767 |
| 67 | 1 | -5.770252 | 0.561644  | 2.527790  |
| 68 | 1 | -6.112929 | -1.267992 | 0.725411  |
| 69 | 1 | -0.559372 | 0.960199  | 6.699107  |
| 70 | 1 | -2.723850 | 1.950319  | 5.686707  |
| 71 | 1 | 5.237663  | -0.805819 | 3.341427  |
| 72 | 1 | 3.579761  | -1.198378 | 5.290399  |
| 73 | 6 | 0.706463  | 3.241395  | -0.441699 |
| 74 | 6 | 1.127970  | 4.459991  | -1.026514 |
| 75 | 6 | -2.369842 | 0.249019  | -1.965182 |
| 76 | 6 | -3.689309 | -0.227482 | -2.218372 |
| 77 | 8 | -4.637857 | 0.393639  | -1.491114 |
| 78 | 6 | -4.177106 | -1.131275 | -3.160389 |
| 79 | 6 | -3.298534 | -1.524185 | -4.131291 |
| 80 | 1 | -5.230440 | -1.384459 | -3.153184 |
| 81 | 1 | -3.570434 | -2.105146 | -5.004853 |
| 82 | 6 | 1.974520  | 2.484463  | -0.223801 |
| 83 | 6 | 2.909609  | 3.243030  | -1.000303 |
| 84 | 8 | 2.385703  | 4.382268  | -1.519070 |
| 85 | 6 | -1.978493 | 2.481335  | -0.208972 |
| 86 | 6 | -2.916424 | 3.358792  | 0.426127  |
| 87 | 8 | -2.395017 | 4.569984  | 0.746505  |
| 88 | 6 | 4.862649  | 2.179002  | -0.321280 |
| 89 | 6 | 4.284302  | 3.109232  | -1.136179 |
| 90 | 6 | 0.553543  | 5.728986  | -0.890500 |
| 91 | 6 | -0.563783 | 5.795090  | -0.096200 |
| 92 | 6 | -4.291722 | 3.249310  | 0.577512  |
| 93 | 6 | -4.867090 | 2.193239  | -0.068668 |
| 94 | 1 | 5.929198  | 1.999191  | -0.265922 |
| 95 | 1 | 4.833196  | 3.784054  | -1.782283 |
| 96 | 1 | 1.056162  | 6.596686  | -1.301728 |
| 97 | 1 | -1.067814 | 6.718650  | 0.163837  |
| 98 | 1 | -4.842901 | 4.023869  | 1.097497  |
| 99 | 1 | -5.933355 | 2.005363  | -0.095626 |

**Table S14.** The optimized Cartesian coordinates of the oxa[24]circulene in the ground singlet state calculated at the B3LYP/6-31(d) level of theory

| Center<br>Number | Atomic<br>Number | Coordinates (Angstroms) |           |           |
|------------------|------------------|-------------------------|-----------|-----------|
|                  |                  | X                       | Y         | Z         |
| 1                | 8                | 3.291043                | -3.319643 | 2.470491  |
| 2                | 6                | 1.551540                | -0.895127 | 4.563950  |
| 3                | 6                | -1.630149               | -2.975204 | -0.085447 |
| 4                | 6                | -1.439901               | -2.417129 | -1.382546 |
| 5                | 6                | -1.891957               | -1.187590 | -2.055831 |
| 6                | 6                | 5.907529                | 0.405094  | -0.941054 |
| 7                | 6                | 5.925486                | 0.244852  | 0.441370  |
| 8                | 6                | 3.466988                | 1.374326  | 2.581544  |
| 9                | 6                | 2.701576                | 1.353285  | 1.397926  |
| 10               | 8                | 4.614815                | 0.611874  | 2.465451  |
| 11               | 6                | 4.697725                | 0.307603  | 1.123800  |
| 12               | 6                | 3.461694                | 0.485581  | 0.488466  |

|    |   |           |           |           |
|----|---|-----------|-----------|-----------|
| 13 | 6 | 3.444389  | 0.186974  | -0.904933 |
| 14 | 6 | 4.656869  | 0.396065  | -1.578531 |
| 15 | 1 | 6.822162  | 0.464089  | -1.520632 |
| 16 | 1 | 6.855941  | 0.205424  | 0.997130  |
| 17 | 6 | -2.559847 | 3.916643  | 1.331469  |
| 18 | 6 | -2.017283 | 2.730505  | 0.798302  |
| 19 | 6 | -2.935795 | 4.098962  | 2.667429  |
| 20 | 6 | -3.083667 | 2.958221  | 3.440569  |
| 21 | 6 | -2.995317 | 1.723845  | 2.770570  |
| 22 | 6 | -2.466563 | 1.539615  | 1.479780  |
| 23 | 1 | -3.214157 | 5.079176  | 3.038600  |
| 24 | 1 | -3.501466 | 3.005151  | 4.440404  |
| 25 | 8 | -3.947807 | 0.768573  | 3.079507  |
| 26 | 6 | -4.264121 | 0.196818  | 1.864383  |
| 27 | 6 | -3.265122 | 0.438776  | 0.910108  |
| 28 | 6 | -3.582636 | 0.056439  | -0.426398 |
| 29 | 6 | -4.953193 | 0.073495  | -0.738263 |
| 30 | 6 | -5.971201 | -0.084252 | 0.210075  |
| 31 | 6 | -5.595353 | -0.125893 | 1.549396  |
| 32 | 1 | -6.330411 | -0.222963 | 2.340901  |
| 33 | 1 | -7.008045 | -0.170983 | -0.095206 |
| 34 | 8 | -5.146854 | 0.163455  | -2.097679 |
| 35 | 6 | -3.905583 | -0.030401 | -2.664370 |
| 36 | 6 | -2.923208 | -0.262534 | -1.679543 |
| 37 | 6 | -1.797960 | -1.478733 | -3.430545 |
| 38 | 6 | -2.581258 | -0.895192 | -4.437403 |
| 39 | 6 | -3.711306 | -0.192511 | -4.038152 |
| 40 | 1 | -4.476086 | 0.102645  | -4.748113 |
| 41 | 1 | -2.433035 | -1.179291 | -5.473637 |
| 42 | 6 | -1.258920 | -3.342604 | -2.425198 |
| 43 | 8 | -1.245181 | -2.724127 | -3.655949 |
| 44 | 6 | -2.122199 | -4.295951 | -0.064013 |
| 45 | 6 | -1.981698 | -5.205708 | -1.114270 |
| 46 | 6 | -1.452198 | -4.725319 | -2.308659 |
| 47 | 1 | -1.338125 | -5.363486 | -3.177737 |
| 48 | 1 | -2.303634 | -6.235480 | -1.005857 |
| 49 | 8 | -2.769376 | -4.562817 | 1.121092  |
| 50 | 6 | -2.581376 | -3.450221 | 1.909741  |
| 51 | 6 | -1.717321 | -2.526093 | 1.288369  |
| 52 | 6 | -1.030600 | -1.639785 | 2.171993  |
| 53 | 6 | -1.641571 | -1.438024 | 3.423173  |
| 54 | 6 | -2.732707 | -2.170900 | 3.910802  |
| 55 | 6 | -3.161738 | -3.264877 | 3.166482  |
| 56 | 1 | -3.890122 | -3.969081 | 3.553020  |
| 57 | 1 | -3.109570 | -1.978805 | 4.909043  |
| 58 | 8 | -0.823749 | -0.741855 | 4.283887  |
| 59 | 6 | 0.432570  | -0.828712 | 3.722429  |
| 60 | 6 | 0.384682  | -1.289546 | 2.391102  |
| 61 | 6 | 2.621844  | -1.677680 | 4.147409  |
| 62 | 6 | 2.545830  | -2.231561 | 2.868541  |
| 63 | 6 | 1.596402  | -1.870122 | 1.889032  |
| 64 | 1 | 3.435489  | -1.933764 | 4.816741  |
| 65 | 1 | 1.485102  | -0.525579 | 5.581473  |
| 66 | 6 | 2.833161  | -3.645617 | 1.214000  |
| 67 | 6 | 1.968025  | -2.650603 | 0.723343  |
| 68 | 6 | 3.092981  | -4.849590 | 0.550973  |
| 69 | 6 | 2.527642  | -5.023581 | -0.711416 |
| 70 | 6 | 1.906433  | -3.916290 | -1.305809 |
| 71 | 6 | 1.762952  | -2.666278 | -0.682517 |
| 72 | 8 | 1.693335  | -3.823324 | -2.664082 |
| 73 | 6 | 1.760577  | -2.475876 | -2.948811 |
| 74 | 6 | 1.833295  | -1.695417 | -1.777088 |
| 75 | 6 | 2.125660  | -2.049921 | -4.231719 |

|     |   |           |           |           |
|-----|---|-----------|-----------|-----------|
| 76  | 6 | 2.918896  | -0.913865 | -4.317603 |
| 77  | 6 | 3.247995  | -0.277416 | -3.116404 |
| 78  | 6 | 2.593261  | -0.478386 | -1.883366 |
| 79  | 8 | 4.483762  | 0.313451  | -2.941785 |
| 80  | 1 | 1.971592  | -2.697057 | -5.088010 |
| 81  | 1 | 3.415713  | -0.641582 | -5.242483 |
| 82  | 1 | 2.675198  | -5.936632 | -1.277715 |
| 83  | 1 | 3.693884  | -5.622217 | 1.017590  |
| 84  | 6 | 1.623427  | 3.165448  | -0.216034 |
| 85  | 6 | 2.198908  | 4.445385  | -0.188776 |
| 86  | 6 | 2.009633  | 2.578686  | 1.066304  |
| 87  | 6 | 2.396030  | 3.684314  | 1.853698  |
| 88  | 6 | 2.927706  | 3.615813  | 3.145725  |
| 89  | 6 | 3.446922  | 2.393862  | 3.545634  |
| 90  | 8 | 2.507891  | 4.827427  | 1.092529  |
| 91  | 1 | 3.086629  | 4.516423  | 3.728797  |
| 92  | 1 | 4.036283  | 2.303024  | 4.451603  |
| 93  | 6 | -1.678185 | 3.073282  | -0.578673 |
| 94  | 6 | -2.416262 | 4.244969  | -0.828251 |
| 95  | 6 | -0.888066 | 3.369308  | -2.833721 |
| 96  | 6 | -1.964946 | 4.220842  | -3.159845 |
| 97  | 6 | -2.682248 | 4.758840  | -2.104707 |
| 98  | 1 | -3.380536 | 5.577056  | -2.241583 |
| 99  | 1 | -2.044702 | 4.625128  | -4.163127 |
| 100 | 6 | -0.649353 | 2.821345  | -1.562554 |
| 101 | 6 | 0.826400  | 2.916406  | -1.393177 |
| 102 | 6 | 2.188046  | 4.642286  | -2.561832 |
| 103 | 6 | 2.569209  | 5.165222  | -1.337315 |
| 104 | 1 | 2.407231  | 5.153850  | -3.492637 |
| 105 | 1 | 3.142187  | 6.082126  | -1.254825 |
| 106 | 6 | 1.255761  | 3.580714  | -2.550512 |
| 107 | 8 | -2.852240 | 4.821299  | 0.338684  |
| 108 | 8 | 0.286743  | 3.571559  | -3.535817 |

**Table S15.** The optimized Cartesian coordinates of the oxa[26]circulene in the ground singlet state calculated at the B3LYP/6-31(d) level of theory

| Center<br>Number | Atomic<br>Number | Coordinates (Angstroms) |           |           |
|------------------|------------------|-------------------------|-----------|-----------|
|                  |                  | X                       | Y         | Z         |
| 1                | 6                | 2.716459                | 1.036029  | 1.628727  |
| 2                | 6                | 3.473837                | 0.815676  | 0.405337  |
| 3                | 6                | -0.854060               | -2.996132 | 1.332908  |
| 4                | 6                | -0.930538               | -2.972731 | -1.368955 |
| 5                | 6                | -3.415419               | -0.714859 | -0.731305 |
| 6                | 6                | 1.092926                | 3.356725  | -0.282522 |
| 7                | 6                | -0.607355               | 2.267343  | -2.003594 |
| 8                | 6                | -1.937003               | 2.375449  | -1.384792 |
| 9                | 6                | -3.409978               | -0.752673 | 0.718134  |
| 10               | 6                | 2.376196                | -2.488765 | -0.724393 |
| 11               | 6                | 2.161360                | -1.530939 | -1.805178 |
| 12               | 6                | 2.506222                | -0.136866 | -1.916915 |
| 13               | 6                | 4.818672                | 0.906320  | 0.798521  |
| 14               | 6                | 3.664225                | 0.878455  | 2.662428  |
| 15               | 6                | 1.665966                | 4.600123  | -0.595993 |
| 16               | 6                | 2.902176                | 0.297023  | -3.200684 |
| 17               | 6                | 2.314879                | -2.292387 | -2.984130 |
| 18               | 6                | 2.936930                | -3.613091 | -1.351465 |
| 19               | 8                | 2.710965                | -3.584138 | -2.709825 |
| 20               | 6                | -1.579179               | -3.697222 | 2.310302  |
| 21               | 6                | -0.820177               | -4.144793 | -2.148284 |

|    |   |           |           |           |
|----|---|-----------|-----------|-----------|
| 22 | 6 | -4.777429 | -0.805599 | -1.082434 |
| 23 | 6 | -4.682609 | -1.248221 | 1.065403  |
| 24 | 8 | -5.540008 | -1.210233 | -0.010473 |
| 25 | 6 | -2.797895 | 2.689206  | -2.448019 |
| 26 | 8 | -2.207244 | 2.426717  | -3.665724 |
| 27 | 6 | -0.856622 | 2.335407  | -3.389344 |
| 28 | 8 | 4.943045  | 0.747802  | 2.161212  |
| 29 | 6 | -2.656325 | 3.462307  | 2.029418  |
| 30 | 6 | 1.097139  | 3.025010  | 1.102740  |
| 31 | 6 | 1.027911  | 4.112170  | 1.985969  |
| 32 | 6 | 2.430878  | -2.492499 | 0.697073  |
| 33 | 6 | 3.521621  | -3.182790 | 1.251934  |
| 34 | 6 | 3.253066  | 0.721213  | -0.997109 |
| 35 | 6 | 4.215069  | 1.351135  | -1.800882 |
| 36 | 8 | 3.869316  | 1.280481  | -3.132556 |
| 37 | 6 | 2.428106  | -2.348202 | 2.957828  |
| 38 | 8 | 3.623790  | -2.934240 | 2.602369  |
| 39 | 6 | 1.593173  | -2.145501 | 1.837690  |
| 40 | 6 | -2.051598 | 1.269682  | 3.443223  |
| 41 | 6 | -2.066311 | 1.133492  | 2.041591  |
| 42 | 6 | -2.181120 | 2.353884  | 1.298875  |
| 43 | 6 | 3.859582  | -4.470083 | -0.734516 |
| 44 | 6 | 4.238133  | -4.178771 | 0.575186  |
| 45 | 6 | 2.719438  | -0.416841 | -4.389453 |
| 46 | 6 | 2.425352  | -1.769443 | -4.275416 |
| 47 | 6 | 5.844601  | 1.353415  | -0.045779 |
| 48 | 6 | 5.503946  | 1.684845  | -1.356118 |
| 49 | 1 | 4.331837  | -5.266590 | -1.298917 |
| 50 | 1 | 5.007342  | -4.748061 | 1.085249  |
| 51 | 1 | 3.007739  | 0.018014  | -5.340215 |
| 52 | 1 | 2.469177  | -2.429892 | -5.134271 |
| 53 | 1 | 6.848927  | 1.500926  | 0.335716  |
| 54 | 1 | 6.236717  | 2.081853  | -2.050012 |
| 55 | 6 | -1.381170 | -1.807793 | -2.076467 |
| 56 | 6 | -1.300255 | -1.876230 | -3.481993 |
| 57 | 6 | 0.181903  | -2.277690 | 2.085589  |
| 58 | 6 | -0.188342 | -2.441146 | 3.437982  |
| 59 | 8 | -1.331514 | -3.200477 | 3.570264  |
| 60 | 6 | 0.658854  | -2.281205 | 4.540848  |
| 61 | 6 | 2.024331  | -2.263243 | 4.292061  |
| 62 | 1 | 0.269392  | -2.386593 | 5.547460  |
| 63 | 1 | 2.747798  | -2.347897 | 5.095387  |
| 64 | 6 | -2.499838 | -0.881825 | -1.816310 |
| 65 | 6 | -3.010293 | -0.580819 | -3.092235 |
| 66 | 8 | -2.154278 | -0.982978 | -4.092610 |
| 67 | 6 | -1.025501 | -3.456925 | -0.003161 |
| 68 | 6 | -1.342805 | -4.822091 | -0.127577 |
| 69 | 8 | -1.083664 | -5.271844 | -1.401916 |
| 70 | 6 | -5.283057 | -0.533891 | -2.356310 |
| 71 | 6 | -4.360453 | -0.327983 | -3.376370 |
| 72 | 6 | -0.835201 | -2.975896 | -4.215938 |
| 73 | 6 | -0.647639 | -4.171132 | -3.532879 |
| 74 | 6 | -1.953527 | -5.577388 | 0.879401  |
| 75 | 6 | -2.166721 | -4.954543 | 2.106894  |
| 76 | 1 | -6.351547 | -0.524016 | -2.540925 |
| 77 | 1 | -4.673753 | -0.155543 | -4.400061 |
| 78 | 1 | -0.834381 | -2.939102 | -5.299899 |
| 79 | 1 | -0.480896 | -5.106768 | -4.054817 |
| 80 | 1 | -2.265850 | -6.599326 | 0.695368  |
| 81 | 1 | -2.643900 | -5.472670 | 2.931441  |
| 82 | 6 | -2.416973 | 2.704775  | -0.086607 |
| 83 | 6 | -3.328199 | 3.775995  | -0.037721 |
| 84 | 8 | -3.378362 | 4.318643  | 1.227069  |

|     |   |           |           |           |
|-----|---|-----------|-----------|-----------|
| 85  | 6 | -2.663505 | -0.194768 | 1.802201  |
| 86  | 6 | -3.012677 | -0.655983 | 3.083699  |
| 87  | 6 | -5.035729 | -1.689603 | 2.343366  |
| 88  | 6 | -4.126181 | -1.459756 | 3.369856  |
| 89  | 6 | -2.160075 | 2.483934  | 4.137976  |
| 90  | 6 | -2.543513 | 3.606366  | 3.413576  |
| 91  | 6 | -3.916004 | 3.529073  | -2.335896 |
| 92  | 6 | -4.127893 | 4.168194  | -1.115680 |
| 93  | 1 | -5.999729 | -2.151037 | 2.526738  |
| 94  | 1 | -4.347051 | -1.731329 | 4.396066  |
| 95  | 1 | -2.158530 | 2.487898  | 5.222552  |
| 96  | 1 | -2.838920 | 4.526639  | 3.905136  |
| 97  | 1 | -4.492215 | 3.787138  | -3.217657 |
| 98  | 1 | -4.883418 | 4.937127  | -0.998531 |
| 99  | 8 | -2.431141 | 0.103048  | 4.076442  |
| 100 | 6 | 0.643335  | 2.825717  | -1.560247 |
| 101 | 6 | 1.325547  | 3.601454  | -2.520111 |
| 102 | 8 | 1.963015  | 4.677353  | -1.938480 |
| 103 | 6 | 1.622516  | 1.924124  | 1.919895  |
| 104 | 6 | 1.556697  | 2.403276  | 3.244899  |
| 105 | 8 | 1.059380  | 3.691474  | 3.298836  |
| 106 | 6 | 3.431091  | 1.151397  | 4.012701  |
| 107 | 6 | 2.315113  | 1.920911  | 4.319058  |
| 108 | 6 | 1.312741  | 5.436889  | 1.614619  |
| 109 | 6 | 1.747965  | 5.665761  | 0.310630  |
| 110 | 6 | 1.169152  | 3.479892  | -3.903830 |
| 111 | 6 | 0.060037  | 2.776450  | -4.355693 |
| 112 | 1 | 4.183307  | 0.927060  | 4.761159  |
| 113 | 1 | 2.170165  | 2.325702  | 5.314879  |
| 114 | 1 | 1.330690  | 6.221276  | 2.363347  |
| 115 | 1 | 2.102047  | 6.639713  | -0.008608 |
| 116 | 1 | 1.803868  | 4.035289  | -4.585435 |
| 117 | 1 | -0.213054 | 2.772534  | -5.405408 |

**Table S16.** The optimized Cartesian coordinates of the oxa[28]circulene in the ground singlet state calculated at the B3LYP/6-31(d) level of theory

| Center<br>Number | Atomic<br>Number | Coordinates (Angstroms) |           |           |
|------------------|------------------|-------------------------|-----------|-----------|
|                  |                  | X                       | Y         | Z         |
| 1                | 6                | 1.704266                | -2.970616 | -1.247803 |
| 2                | 6                | 2.014248                | -3.276184 | 0.140703  |
| 3                | 6                | 1.805261                | 2.762435  | -1.453562 |
| 4                | 6                | 1.703659                | 2.970860  | 1.247876  |
| 5                | 6                | -1.755284               | 3.195327  | 0.718838  |
| 6                | 6                | -1.754691               | -3.195540 | -0.718959 |
| 7                | 6                | -1.572102               | -2.370066 | 1.870704  |
| 8                | 6                | -1.965909               | -1.008026 | 2.304536  |
| 9                | 6                | -1.777087               | 3.223897  | -0.737378 |
| 10               | 6                | 3.609315                | 0.053580  | 0.710609  |
| 11               | 6                | 2.781812                | -0.320807 | 1.856172  |
| 12               | 6                | 1.955732                | -1.470373 | 2.146083  |
| 13               | 6                | 2.825758                | -4.426924 | 0.081515  |
| 14               | 6                | 2.662668                | -3.709544 | -1.980948 |
| 15               | 6                | -2.650650               | -4.223354 | -1.096168 |
| 16               | 6                | 1.831427                | -1.797724 | 3.515217  |
| 17               | 6                | 3.471646                | 0.218029  | 2.966203  |
| 18               | 6                | 4.837596                | 0.441707  | 1.272150  |
| 19               | 8                | 4.698599                | 0.728628  | 2.609799  |
| 20               | 6                | 1.857813                | 3.721438  | -2.480987 |
| 21               | 6                | 2.661986                | 3.709864  | 1.981082  |



|    |   |           |           |           |
|----|---|-----------|-----------|-----------|
| 22 | 6 | -2.651484 | 4.222976  | 1.095903  |
| 23 | 6 | -2.316281 | 4.490578  | -1.050077 |
| 24 | 8 | -2.946859 | 5.044729  | 0.036220  |
| 25 | 6 | -1.703158 | -1.006363 | 3.695515  |
| 26 | 8 | -1.180683 | -2.198759 | 4.131986  |
| 27 | 6 | -1.322618 | -3.058090 | 3.073964  |
| 28 | 8 | 3.329641  | -4.607977 | -1.183386 |
| 29 | 6 | -0.915367 | -2.716551 | -1.783026 |
| 30 | 6 | -1.428468 | -2.923896 | -3.079796 |
| 31 | 6 | 3.609094  | -0.052588 | -0.711151 |
| 32 | 6 | 4.837157  | -0.440898 | -1.273073 |
| 33 | 6 | 1.806057  | -2.761714 | 1.453582  |
| 34 | 6 | 1.858659  | -3.720589 | 2.481122  |
| 35 | 8 | 1.649871  | -3.147938 | 3.712337  |
| 36 | 6 | 3.470641  | -0.217278 | -2.966674 |
| 37 | 8 | 4.697670  | -0.727937 | -2.610629 |
| 38 | 6 | 2.781181  | 0.321704  | -1.856465 |
| 39 | 6 | -1.703915 | 1.005451  | -3.695282 |
| 40 | 6 | -1.966434 | 1.007226  | -2.304258 |
| 41 | 6 | -3.839770 | -0.110714 | -0.704737 |
| 42 | 6 | 6.076977  | 0.281921  | 0.635845  |
| 43 | 6 | 6.076759  | -0.281184 | -0.637168 |
| 44 | 6 | 2.258875  | -1.013451 | 4.592333  |
| 45 | 6 | 3.142154  | 0.015692  | 4.308096  |
| 46 | 6 | 3.000164  | -5.327339 | 1.135478  |
| 47 | 6 | 2.404599  | -5.004141 | 2.350742  |
| 48 | 1 | 6.998153  | 0.506732  | 1.161910  |
| 49 | 1 | 6.997756  | -0.506058 | -1.163519 |
| 50 | 1 | 2.078796  | -1.343705 | 5.609419  |
| 51 | 1 | 3.681613  | 0.535950  | 5.091325  |
| 52 | 1 | 3.559450  | -6.245484 | 0.994663  |
| 53 | 1 | 2.481147  | -5.653302 | 3.215982  |
| 54 | 6 | 0.544829  | 2.559826  | 1.997061  |
| 55 | 6 | 0.698451  | 2.604398  | 3.399682  |
| 56 | 6 | 1.954975  | 1.471199  | -2.146228 |
| 57 | 6 | 1.830531  | 1.798683  | -3.515312 |
| 58 | 8 | 1.649002  | 3.148922  | -3.712263 |
| 59 | 6 | 2.257741  | 1.014445  | -4.592548 |
| 60 | 6 | 3.140945  | -0.014809 | -4.308508 |
| 61 | 1 | 2.077521  | 1.344773  | -5.609584 |
| 62 | 1 | 3.680181  | -0.535098 | -5.091872 |
| 63 | 6 | -0.915940 | 2.716571  | 1.782974  |
| 64 | 6 | -1.429114 | 2.923972  | 3.079701  |
| 65 | 8 | -0.508956 | 2.633096  | 4.054916  |
| 66 | 6 | 2.013564  | 3.276664  | -0.140604 |
| 67 | 6 | 2.824921  | 4.427502  | -0.081298 |
| 68 | 8 | 3.328829  | 4.608462  | 1.183598  |
| 69 | 6 | -3.132781 | 4.439382  | 2.385952  |
| 70 | 6 | -2.549570 | 3.698666  | 3.403735  |
| 71 | 6 | 1.834430  | 3.037898  | 4.094475  |
| 72 | 6 | 2.827723  | 3.672714  | 3.364552  |
| 73 | 6 | 2.999094  | 5.328130  | -1.135120 |
| 74 | 6 | 2.403580  | 5.005038  | -2.350428 |
| 75 | 1 | -3.886859 | 5.194023  | 2.579277  |
| 76 | 1 | -2.822222 | 3.840657  | 4.443368  |
| 77 | 1 | 1.823769  | 3.056690  | 5.178705  |
| 78 | 1 | 3.643577  | 4.204407  | 3.841222  |
| 79 | 1 | 3.558172  | 6.246378  | -0.994145 |
| 80 | 1 | 2.480009  | 5.654383  | -3.215543 |
| 81 | 6 | -3.839614 | 0.109806  | 0.705370  |
| 82 | 6 | -5.084621 | 0.511372  | 1.233860  |
| 83 | 6 | -1.572663 | 2.369382  | -1.870663 |
| 84 | 6 | -1.323445 | 3.057261  | -3.074063 |

|     |   |           |           |           |
|-----|---|-----------|-----------|-----------|
| 85  | 6 | -2.168949 | 5.138431  | -2.278613 |
| 86  | 6 | -1.553693 | 4.421791  | -3.295924 |
| 87  | 1 | -2.519220 | 6.155266  | -2.416348 |
| 88  | 1 | -1.394768 | 4.841561  | -4.282776 |
| 89  | 8 | -1.181570 | 2.197801  | -4.131985 |
| 90  | 6 | -1.776458 | -3.224362 | 0.737261  |
| 91  | 6 | -2.315474 | -4.491150 | 1.049792  |
| 92  | 8 | -2.945937 | -5.045265 | -0.036586 |
| 93  | 6 | 0.545424  | -2.559724 | -1.997055 |
| 94  | 6 | 0.699083  | -2.604263 | -3.399673 |
| 95  | 8 | -0.508302 | -2.632804 | -4.054948 |
| 96  | 6 | 2.828404  | -3.672479 | -3.364418 |
| 97  | 6 | 1.835065  | -3.037828 | -4.094413 |
| 98  | 6 | -2.548641 | -3.698934 | -3.403959 |
| 99  | 6 | -3.131739 | -4.439862 | -2.386276 |
| 100 | 6 | -2.168092 | -5.139166 | 2.278239  |
| 101 | 6 | -1.552810 | -4.422660 | 3.295638  |
| 102 | 1 | 3.644330  | -4.204111 | -3.841033 |
| 103 | 1 | 1.824416  | -3.056781 | -5.178641 |
| 104 | 1 | -2.821115 | -3.841035 | -4.443627 |
| 105 | 1 | -3.885578 | -5.194709 | -2.579715 |
| 106 | 1 | -2.518315 | -6.156035 | 2.415837  |
| 107 | 1 | -1.393856 | -4.842609 | 4.282411  |
| 108 | 6 | -2.980267 | -0.070870 | 1.876654  |
| 109 | 6 | -3.707138 | 0.545850  | 2.925077  |
| 110 | 8 | -4.963658 | 0.924642  | 2.533754  |
| 111 | 6 | -2.980616 | 0.069927  | -1.876161 |
| 112 | 6 | -3.707713 | -0.546775 | -2.924442 |
| 113 | 8 | -4.964217 | -0.925415 | -2.532904 |
| 114 | 6 | -2.251413 | 0.148733  | -4.654142 |
| 115 | 6 | -3.329601 | -0.622796 | -4.263096 |
| 116 | 6 | -6.325120 | -0.314056 | -0.618828 |
| 117 | 6 | -6.324959 | 0.313474  | 0.619933  |
| 118 | 6 | -3.328871 | 0.621739  | 4.263686  |
| 119 | 6 | -2.250637 | -0.149806 | 4.654539  |
| 120 | 1 | -1.963317 | 0.249895  | -5.694411 |
| 121 | 1 | -3.931897 | -1.178126 | -4.973016 |
| 122 | 1 | -7.241548 | -0.572841 | -1.137273 |
| 123 | 1 | -7.241258 | 0.572373  | 1.138552  |
| 124 | 1 | -3.931140 | 1.176950  | 4.973721  |
| 125 | 1 | -1.962429 | -0.251076 | 5.694768  |
| 126 | 6 | -5.084911 | -0.512136 | -1.232984 |

**Table S17.** The optimized Cartesian coordinates of the oxa[30]circulene in the ground singlet state calculated at the B3LYP/6-31(d) level of theory

| Center Number | Atomic Number | Coordinates (Angstroms) |           |           |
|---------------|---------------|-------------------------|-----------|-----------|
|               |               | X                       | Y         | Z         |
| 1             | 6             | 2.887537                | -1.752598 | 1.662249  |
| 2             | 6             | -0.097777               | 2.838221  | -4.569310 |
| 3             | 6             | -1.640067               | 1.946002  | -2.283349 |
| 4             | 6             | -0.497427               | 2.825561  | -2.076432 |
| 5             | 6             | -0.304176               | 5.393163  | 0.682445  |
| 6             | 6             | -0.077600               | 4.035802  | 0.360003  |
| 7             | 6             | 0.074026                | 3.376979  | 1.662249  |
| 8             | 6             | -0.459065               | 4.324531  | 2.575403  |
| 9             | 8             | -0.683006               | 5.539413  | 1.988544  |
| 10            | 6             | 0.905489                | 2.358458  | 2.278541  |
| 11            | 6             | 0.731292                | 2.233919  | 3.678358  |
| 12            | 6             | -0.060561               | 3.032556  | 4.509297  |

|    |   |           |           |           |
|----|---|-----------|-----------|-----------|
| 13 | 6 | -0.620575 | 4.162396  | 3.948380  |
| 14 | 1 | -1.095542 | 4.936272  | 4.540496  |
| 15 | 1 | -0.058184 | 2.853525  | 5.578420  |
| 16 | 6 | 2.276571  | 1.809842  | 2.046012  |
| 17 | 6 | 2.750872  | 1.515921  | 3.342850  |
| 18 | 8 | 1.758168  | 1.556396  | 4.281727  |
| 19 | 6 | 3.323509  | 1.944256  | 1.064456  |
| 20 | 6 | 4.591407  | 2.289661  | 1.596453  |
| 21 | 6 | 5.026513  | 2.049188  | 2.896169  |
| 22 | 6 | 4.079170  | 1.564250  | 3.780219  |
| 23 | 1 | 4.300614  | 1.391603  | 4.826753  |
| 24 | 1 | 6.042082  | 2.281932  | 3.195740  |
| 25 | 6 | 3.482552  | 2.148267  | -0.369505 |
| 26 | 6 | 4.631274  | 2.966886  | -0.477955 |
| 27 | 8 | 5.358945  | 2.960558  | 0.681754  |
| 28 | 6 | 2.949908  | 1.703248  | -1.624200 |
| 29 | 6 | 3.217970  | 2.586951  | -2.691410 |
| 30 | 6 | 4.154033  | 3.627206  | -2.697219 |
| 31 | 6 | 4.962828  | 3.755040  | -1.579363 |
| 32 | 1 | 5.806539  | 4.434858  | -1.542159 |
| 33 | 1 | 4.318199  | 4.199398  | -3.603200 |
| 34 | 6 | 2.505320  | 0.447339  | -2.283349 |
| 35 | 6 | 2.354752  | 0.828899  | -3.640555 |
| 36 | 8 | 2.696814  | 2.133567  | -3.868038 |
| 37 | 6 | 2.695721  | -0.981997 | -2.076432 |
| 38 | 6 | 2.836244  | -1.730344 | -3.274872 |
| 39 | 6 | 2.506860  | -1.334433 | -4.569310 |
| 40 | 6 | 2.219823  | -0.000480 | -4.755194 |
| 41 | 1 | 2.083548  | 0.434791  | -5.738498 |
| 42 | 1 | 2.592116  | -2.037786 | -5.388995 |
| 43 | 6 | 3.279722  | -1.874503 | -1.051681 |
| 44 | 6 | 3.964805  | -2.859266 | -1.796193 |
| 45 | 8 | 3.554850  | -2.879572 | -3.099264 |
| 46 | 6 | 0.000000  | 6.485090  | -0.134059 |
| 47 | 6 | 0.525133  | 6.199806  | -1.384638 |
| 48 | 6 | 0.493795  | 4.863255  | -1.796193 |
| 49 | 6 | -0.016494 | 3.777574  | -1.051681 |
| 50 | 1 | 0.849238  | 6.973211  | -2.071823 |
| 51 | 1 | -0.112984 | 7.497812  | 0.236089  |
| 52 | 6 | 0.080400  | 3.321432  | -3.274872 |
| 53 | 8 | 0.716357  | 4.518376  | -3.099264 |
| 54 | 6 | -1.109496 | 1.922663  | -4.755194 |
| 55 | 6 | -1.895224 | 1.624825  | -3.640555 |
| 56 | 1 | 0.468717  | 3.263731  | -5.388995 |
| 57 | 1 | -1.418314 | 1.587010  | -5.738498 |
| 58 | 6 | -2.950010 | 1.703071  | -1.624200 |
| 59 | 6 | -3.849350 | 1.493368  | -2.691410 |
| 60 | 8 | -3.196130 | 1.268726  | -3.868038 |
| 61 | 6 | -3.601730 | 1.941845  | -0.369505 |
| 62 | 6 | -4.885036 | 2.527358  | -0.477955 |
| 63 | 6 | -5.733373 | 2.420415  | -1.579363 |
| 64 | 6 | -5.218269 | 1.783896  | -2.697219 |
| 65 | 8 | -5.243391 | 3.160703  | 0.681754  |
| 66 | 6 | -4.278608 | 2.831445  | 1.596453  |
| 67 | 6 | -3.345529 | 1.906115  | 1.064456  |
| 68 | 6 | -4.287906 | 3.328494  | 2.896169  |
| 69 | 6 | -3.394265 | 2.750540  | 3.780219  |
| 70 | 6 | -2.688262 | 1.624365  | 3.342850  |
| 71 | 6 | -2.705655 | 1.066648  | 2.046012  |
| 72 | 1 | -4.997252 | 4.091630  | 3.195740  |
| 73 | 1 | -3.355470 | 3.028639  | 4.826753  |
| 74 | 1 | -6.743969 | 2.811181  | -1.542159 |
| 75 | 1 | -5.795884 | 1.639971  | -3.603200 |

|     |   |           |           |           |
|-----|---|-----------|-----------|-----------|
| 76  | 6 | -2.495229 | -0.395053 | 2.278541  |
| 77  | 6 | -2.300277 | -0.483642 | 3.678358  |
| 78  | 8 | -2.226962 | 0.744420  | 4.281727  |
| 79  | 6 | -2.961563 | -1.624381 | 1.662249  |
| 80  | 6 | -3.515622 | -2.559828 | 2.575403  |
| 81  | 6 | -3.294453 | -2.618632 | 3.948380  |
| 82  | 6 | -2.595990 | -1.568726 | 4.509297  |
| 83  | 1 | -2.442133 | -1.477151 | 5.578420  |
| 84  | 1 | -3.727166 | -3.416903 | 4.540496  |
| 85  | 6 | -3.456307 | -2.085104 | 0.360003  |
| 86  | 6 | -4.518528 | -2.960005 | 0.682445  |
| 87  | 8 | -4.455770 | -3.361207 | 1.988544  |
| 88  | 6 | -3.263228 | -1.903071 | -1.051681 |
| 89  | 6 | -4.458600 | -2.003988 | -1.796193 |
| 90  | 6 | -5.631756 | -2.645125 | -1.384638 |
| 91  | 6 | -5.616253 | -3.242545 | -0.134059 |
| 92  | 1 | -6.436804 | -3.846753 | 0.236089  |
| 93  | 1 | -6.463597 | -2.751144 | -2.071823 |
| 94  | 6 | -2.198295 | -1.843565 | -2.076432 |
| 95  | 6 | -2.916644 | -1.591088 | -3.274872 |
| 96  | 8 | -4.271207 | -1.638805 | -3.099264 |
| 97  | 6 | -0.865253 | -2.393340 | -2.283349 |
| 98  | 6 | -0.459528 | -2.453725 | -3.640555 |
| 99  | 6 | -1.110327 | -1.922183 | -4.755194 |
| 100 | 6 | -2.409083 | -1.503788 | -4.569310 |
| 101 | 1 | -3.060832 | -1.225945 | -5.388995 |
| 102 | 1 | -0.665234 | -2.021801 | -5.738498 |
| 103 | 6 | 0.000102  | -3.406319 | -1.624200 |
| 104 | 6 | 0.631380  | -4.080319 | -2.691410 |
| 105 | 8 | 0.499316  | -3.402293 | -3.868038 |
| 106 | 6 | 1.064236  | -5.411101 | -2.697219 |
| 107 | 6 | 0.770546  | -6.175455 | -1.579363 |
| 108 | 6 | 0.253761  | -5.494244 | -0.477955 |
| 109 | 6 | 0.119178  | -4.090112 | -0.369505 |
| 110 | 1 | 0.937430  | -7.246039 | -1.542159 |
| 111 | 1 | 1.477686  | -5.839369 | -3.603200 |
| 112 | 6 | 0.022020  | -3.850371 | 1.064456  |
| 113 | 6 | -0.312799 | -5.121106 | 1.596453  |
| 114 | 8 | -0.115554 | -6.121261 | 0.681754  |
| 115 | 6 | -0.062610 | -3.140286 | 3.342850  |
| 116 | 6 | 0.429084  | -2.876490 | 2.046012  |
| 117 | 8 | 0.468795  | -2.300816 | 4.281727  |
| 118 | 6 | 1.568985  | -1.750277 | 3.678358  |
| 119 | 6 | 1.589740  | -1.963406 | 2.278541  |
| 120 | 6 | 2.656551  | -1.463830 | 4.509297  |
| 121 | 6 | 3.915028  | -1.543764 | 3.948380  |
| 122 | 6 | 3.974686  | -1.764704 | 2.575403  |
| 123 | 1 | 4.822707  | -1.519369 | 4.540496  |
| 124 | 1 | 2.500317  | -1.376373 | 5.578420  |
| 125 | 6 | 3.533907  | -1.950698 | 0.360003  |
| 126 | 6 | 4.822704  | -2.433157 | 0.682445  |
| 127 | 8 | 5.138776  | -2.178206 | 1.988544  |
| 128 | 6 | 5.106623  | -3.554681 | -1.384638 |
| 129 | 6 | 5.616253  | -3.242545 | -0.134059 |
| 130 | 1 | 5.614359  | -4.222067 | -2.071823 |
| 131 | 1 | 6.549788  | -3.651059 | 0.236089  |
| 132 | 6 | -0.684905 | -4.314790 | 3.780219  |
| 133 | 6 | -0.738608 | -5.377682 | 2.896169  |
| 134 | 1 | -0.945144 | -4.420242 | 4.826753  |
| 135 | 1 | -1.044829 | -6.373563 | 3.195740  |

---

**Table S18.** The optimized Cartesian coordinates of the [4]circulene ketone in the ground singlet state calculated at the B3LYP/6-31(d) level of theory

| Center Number | Atomic Number | Coordinates (Angstroms) |           |           |
|---------------|---------------|-------------------------|-----------|-----------|
|               |               | X                       | Y         | Z         |
| 1             | 6             | -0.635285               | 0.825530  | 1.363271  |
| 2             | 6             | 0.780177                | 0.690208  | 1.363269  |
| 3             | 6             | -0.780177               | -0.690208 | 1.363269  |
| 4             | 6             | 0.635285                | -0.825530 | 1.363271  |
| 5             | 6             | 1.521239                | 1.085772  | 0.274714  |
| 6             | 6             | -1.287996               | 1.354362  | 0.274736  |
| 7             | 6             | -0.497853               | 2.177294  | -0.594171 |
| 8             | 6             | 0.901358                | 2.043512  | -0.594187 |
| 9             | 6             | 2.201519                | -0.210482 | -0.286245 |
| 10            | 6             | 1.287996                | -1.354362 | 0.274736  |
| 11            | 6             | -1.521239               | -1.085772 | 0.274714  |
| 12            | 6             | -0.901358               | -2.043512 | -0.594187 |
| 13            | 6             | 0.497853                | -2.177294 | -0.594171 |
| 14            | 6             | -2.201519               | 0.210482  | -0.286245 |
| 15            | 1             | -0.958182               | 2.707781  | -1.424376 |
| 16            | 1             | 1.453837                | 2.477152  | -1.424415 |
| 17            | 1             | -1.453837               | -2.477152 | -1.424415 |
| 18            | 1             | 0.958182                | -2.707781 | -1.424376 |
| 19            | 8             | 3.037645                | -0.290389 | -1.148212 |
| 20            | 8             | -3.037645               | 0.290389  | -1.148212 |

**Table S19.** The optimized Cartesian coordinates of the [6]circulene ketone in the ground singlet state calculated at the B3LYP/6-31(d) level of theory

| Center Number | Atomic Number | Coordinates (Angstroms) |           |           |
|---------------|---------------|-------------------------|-----------|-----------|
|               |               | X                       | Y         | Z         |
| 1             | 6             | 0.098074                | 1.407316  | -0.804786 |
| 2             | 6             | -1.149779               | 0.817380  | -0.804792 |
| 3             | 6             | 1.282762                | 0.587048  | -0.804792 |
| 4             | 6             | 1.169735                | -0.788593 | -0.804786 |
| 5             | 6             | -0.132983               | -1.404428 | -0.804792 |
| 6             | 6             | -1.267809               | -0.618724 | -0.804786 |
| 7             | 6             | 0.332310                | 2.630446  | -0.163113 |
| 8             | 6             | -2.243636               | 1.412698  | -0.163176 |
| 9             | 6             | 2.345251                | 1.236697  | -0.163176 |
| 10            | 6             | 2.111878                | -1.603012 | -0.163113 |
| 11            | 6             | -0.101614               | -2.649395 | -0.163176 |
| 12            | 6             | -2.444188               | -1.027434 | -0.163113 |
| 13            | 6             | -1.297823               | -3.131312 | 0.375914  |
| 14            | 6             | -2.474342               | -2.316706 | 0.376036  |
| 15            | 6             | -2.062885               | 2.689604  | 0.375914  |
| 16            | 6             | -0.769155               | 3.301196  | 0.376036  |
| 17            | 6             | 3.243497                | -0.984491 | 0.376036  |
| 18            | 6             | 3.360707                | 0.441709  | 0.375914  |
| 19            | 6             | 1.841635                | 2.659776  | 0.167746  |
| 20            | 6             | -3.224252               | 0.265015  | 0.167746  |
| 21            | 6             | 1.382616                | -2.924791 | 0.167746  |
| 22            | 1             | -1.314833               | -4.070368 | 0.922337  |
| 23            | 1             | -3.347233               | -2.662996 | 0.922682  |
| 24            | 1             | -2.867626               | 3.173862  | 0.922337  |
| 25            | 1             | -0.632606               | 4.230287  | 0.922682  |
| 26            | 1             | 3.979839                | -1.567290 | 0.922682  |
| 27            | 1             | 4.182458                | 0.896505  | 0.922337  |

|    |   |           |           |          |
|----|---|-----------|-----------|----------|
| 28 | 8 | 2.461861  | 3.555447  | 0.694060 |
| 29 | 8 | 1.848177  | -3.909758 | 0.694060 |
| 30 | 8 | -4.310038 | 0.354310  | 0.694060 |

**Table S20.** The optimized Cartesian coordinates of the [8]circulene ketone in the ground singlet state calculated at the B3LYP/6-31(d) level of theory

| Center Number | Atomic Number | Coordinates (Angstroms) |           |          |
|---------------|---------------|-------------------------|-----------|----------|
|               |               | X                       | Y         | Z        |
| 1             | 6             | -1.182375               | -3.089871 | 0.000000 |
| 2             | 6             | -0.748224               | -1.734205 | 0.000000 |
| 3             | 6             | -1.734205               | -0.748224 | 0.000000 |
| 4             | 6             | -1.734205               | 0.748224  | 0.000000 |
| 5             | 6             | -3.089871               | 1.182375  | 0.000000 |
| 6             | 6             | -3.089871               | -1.182375 | 0.000000 |
| 7             | 6             | -0.748224               | 1.734205  | 0.000000 |
| 8             | 6             | -3.993150               | 0.000000  | 0.000000 |
| 9             | 6             | -1.182375               | 3.089871  | 0.000000 |
| 10            | 6             | -3.495323               | -2.506201 | 0.000000 |
| 11            | 6             | -2.506201               | -3.495323 | 0.000000 |
| 12            | 6             | -2.506201               | 3.495323  | 0.000000 |
| 13            | 6             | -3.495323               | 2.506201  | 0.000000 |
| 14            | 1             | -4.554948               | -2.742680 | 0.000000 |
| 15            | 1             | -2.742680               | -4.554948 | 0.000000 |
| 16            | 1             | -2.742680               | 4.554948  | 0.000000 |
| 17            | 1             | -4.554948               | 2.742680  | 0.000000 |
| 18            | 6             | 0.748224                | -1.734205 | 0.000000 |
| 19            | 6             | 1.182375                | -3.089871 | 0.000000 |
| 20            | 6             | 1.734205                | -0.748224 | 0.000000 |
| 21            | 6             | 1.734205                | 0.748224  | 0.000000 |
| 22            | 6             | 0.748224                | 1.734205  | 0.000000 |
| 23            | 6             | 3.089871                | -1.182375 | 0.000000 |
| 24            | 6             | 3.089871                | 1.182375  | 0.000000 |
| 25            | 6             | 1.182375                | 3.089871  | 0.000000 |
| 26            | 6             | 3.495323                | -2.506201 | 0.000000 |
| 27            | 6             | 2.506201                | -3.495323 | 0.000000 |
| 28            | 6             | 2.506201                | 3.495323  | 0.000000 |
| 29            | 6             | 3.495323                | 2.506201  | 0.000000 |
| 30            | 1             | 4.554948                | -2.742680 | 0.000000 |
| 31            | 1             | 2.742680                | -4.554948 | 0.000000 |
| 32            | 1             | 2.742680                | 4.554948  | 0.000000 |
| 33            | 1             | 4.554948                | 2.742680  | 0.000000 |
| 34            | 6             | 3.993150                | 0.000000  | 0.000000 |
| 35            | 6             | 0.000000                | -3.993150 | 0.000000 |
| 36            | 6             | 0.000000                | 3.993150  | 0.000000 |
| 37            | 8             | 0.000000                | 5.212010  | 0.000000 |
| 38            | 8             | 5.212010                | 0.000000  | 0.000000 |
| 39            | 8             | 0.000000                | -5.212010 | 0.000000 |
| 40            | 8             | -5.212010               | 0.000000  | 0.000000 |

**Table S21.** The optimized Cartesian coordinates of the [10]circulene ketone in the ground singlet state calculated at the B3LYP/6-31(d) level of theory

| Center Number | Atomic Number | Coordinates (Angstroms) |           |           |
|---------------|---------------|-------------------------|-----------|-----------|
|               |               | X                       | Y         | Z         |
| 1             | 6             | -0.755184               | -4.547133 | -0.623731 |

|    |   |           |           |           |
|----|---|-----------|-----------|-----------|
| 2  | 6 | 1.490137  | 2.660502  | -1.875179 |
| 3  | 6 | 1.603196  | 4.010629  | -1.598742 |
| 4  | 6 | 0.745048  | 4.538724  | -0.630401 |
| 5  | 6 | -0.023823 | 3.646790  | 0.088431  |
| 6  | 6 | 0.037233  | 2.219016  | -0.009198 |
| 7  | 6 | 0.683969  | 1.721345  | -1.154820 |
| 8  | 6 | 0.409389  | 0.569927  | -2.087383 |
| 9  | 6 | -0.396106 | -0.583255 | -2.089350 |
| 10 | 6 | -0.680938 | -1.731394 | -1.156020 |
| 11 | 6 | -0.043017 | -2.228266 | -0.004982 |
| 12 | 6 | 0.666859  | -1.701203 | 1.215145  |
| 13 | 6 | 0.428048  | -0.620208 | 2.083210  |
| 14 | 6 | -0.436806 | 0.614376  | 2.080825  |
| 15 | 6 | -0.675743 | 1.692604  | 1.209437  |
| 16 | 6 | -1.110067 | 4.030982  | 1.023150  |
| 17 | 6 | -1.443313 | 2.779463  | 1.743907  |
| 18 | 6 | -2.054491 | 2.804605  | 2.983762  |
| 19 | 6 | -1.725662 | 1.786398  | 3.880973  |
| 20 | 6 | -0.869471 | 0.799178  | 3.435561  |
| 21 | 6 | -0.005077 | 0.001085  | 4.338010  |
| 22 | 6 | 0.858952  | -0.801167 | 3.438915  |
| 23 | 6 | 1.712323  | -1.788784 | 3.888709  |
| 24 | 6 | 2.039134  | -2.811263 | 2.995550  |
| 25 | 6 | 1.430001  | -2.788643 | 1.754548  |
| 26 | 1 | -2.615818 | 3.684637  | 3.282971  |
| 27 | 1 | -2.002788 | 1.821618  | 4.930194  |
| 28 | 1 | 1.988317  | -1.820852 | 4.938311  |
| 29 | 1 | 2.597400  | -3.691878 | 3.298742  |
| 30 | 6 | 1.094716  | -4.041009 | 1.036147  |
| 31 | 6 | 0.012767  | -3.655873 | 0.096724  |
| 32 | 6 | -1.605016 | -4.018782 | -1.599273 |
| 33 | 6 | -1.485053 | -2.669918 | -1.879479 |
| 34 | 6 | -1.828522 | -2.126718 | -3.215729 |
| 35 | 6 | -0.919862 | -0.963188 | -3.365950 |
| 36 | 6 | -0.508612 | -0.470959 | -4.588769 |
| 37 | 6 | 0.541454  | 0.452339  | -4.585621 |
| 38 | 6 | 0.943033  | 0.947285  | -3.360616 |
| 39 | 6 | 1.847509  | 2.113408  | -3.206169 |
| 40 | 1 | 2.232249  | 4.633216  | -2.227594 |
| 41 | 1 | 0.634032  | 5.604975  | -0.459309 |
| 42 | 1 | 0.997574  | 0.832585  | -5.494345 |
| 43 | 1 | -0.958247 | -0.852692 | -5.500083 |
| 44 | 1 | -2.232037 | -4.641143 | -2.230406 |
| 45 | 1 | -0.648995 | -5.613231 | -0.448761 |
| 46 | 8 | -1.570385 | 5.145939  | 1.195037  |
| 47 | 8 | 2.619394  | 2.570391  | -4.029693 |
| 48 | 8 | -2.593422 | -2.584741 | -4.045173 |
| 49 | 8 | 1.549809  | -5.157290 | 1.213342  |
| 50 | 8 | -0.004691 | 0.004231  | 5.556873  |

**Table S22.** The optimized Cartesian coordinates of the [12]circulene ketone in the ground singlet state calculated at the B3LYP/6-31(d) level of theory

| Center Number | Atomic Number | Coordinates (Angstroms) |           |          |
|---------------|---------------|-------------------------|-----------|----------|
|               |               | X                       | Y         | Z        |
| 1             | 6             | -1.370770               | 1.290247  | 1.246301 |
| 2             | 6             | -2.239668               | 0.367350  | 0.648700 |
| 3             | 6             | 0.374361                | -2.200919 | 0.591738 |
| 4             | 6             | 1.370772                | -1.290248 | 1.246299 |
| 5             | 6             | 2.239669                | -0.367351 | 0.648700 |

|    |   |           |           |           |
|----|---|-----------|-----------|-----------|
| 6  | 6 | -0.374361 | 2.200919  | 0.591739  |
| 7  | 6 | 0.374753  | 2.200970  | -0.591451 |
| 8  | 6 | 1.370840  | 1.290182  | -1.246342 |
| 9  | 6 | 2.239620  | 0.366994  | -0.649022 |
| 10 | 6 | -0.374752 | -2.200970 | -0.591453 |
| 11 | 6 | -1.370839 | -1.290181 | -1.246343 |
| 12 | 6 | -2.239619 | -0.366994 | -0.649022 |
| 13 | 6 | -3.577494 | 0.338634  | 1.140601  |
| 14 | 6 | -3.968302 | 0.877240  | 2.354980  |
| 15 | 6 | -3.034299 | 1.649305  | 3.058511  |
| 16 | 6 | -1.820407 | 1.921974  | 2.441719  |
| 17 | 6 | -1.147774 | 3.248016  | 2.583481  |
| 18 | 6 | -0.491552 | 3.455843  | 1.254618  |
| 19 | 6 | -3.577337 | -0.337978 | -1.141205 |
| 20 | 6 | -4.484031 | 0.000468  | -0.000406 |
| 21 | 6 | -1.820432 | -1.922016 | -2.441720 |
| 22 | 6 | -3.034122 | -1.649101 | -3.058802 |
| 23 | 6 | -3.968040 | -0.876637 | -2.355594 |
| 24 | 6 | -0.492230 | -3.456021 | -1.254041 |
| 25 | 6 | -1.148200 | -3.248310 | -2.583048 |
| 26 | 6 | -0.197634 | -4.678100 | -0.672827 |
| 27 | 6 | 0.196626  | -4.677986 | 0.673705  |
| 28 | 6 | 0.491550  | -3.455843 | 1.254618  |
| 29 | 6 | 1.147775  | -3.248018 | 2.583480  |
| 30 | 6 | 1.820407  | -1.921975 | 2.441718  |
| 31 | 6 | 3.034298  | -1.649306 | 3.058511  |
| 32 | 6 | 3.968302  | -0.877241 | 2.354980  |
| 33 | 6 | 3.577495  | -0.338635 | 1.140601  |
| 34 | 6 | 3.577338  | 0.337977  | -1.141206 |
| 35 | 6 | 4.484032  | -0.000472 | -0.000407 |
| 36 | 6 | 3.968040  | 0.876638  | -2.355594 |
| 37 | 6 | 1.820433  | 1.922017  | -2.441719 |
| 38 | 6 | 3.034123  | 1.649102  | -3.058802 |
| 39 | 6 | 1.148202  | 3.248312  | -2.583046 |
| 40 | 6 | 0.492229  | 3.456022  | -1.254040 |
| 41 | 6 | -0.196631 | 4.677987  | 0.673704  |
| 42 | 6 | 0.197630  | 4.678100  | -0.672828 |
| 43 | 1 | -5.004304 | 0.804453  | 2.671833  |
| 44 | 1 | -3.306864 | 2.188840  | 3.960847  |
| 45 | 1 | -3.306677 | -2.188724 | -3.961089 |
| 46 | 1 | -5.003957 | -0.803611 | -2.672670 |
| 47 | 1 | -0.340965 | -5.594388 | -1.237140 |
| 48 | 1 | 0.339753  | -5.594174 | 1.238231  |
| 49 | 1 | 3.306864  | -2.188841 | 3.960847  |
| 50 | 1 | 5.004304  | -0.804454 | 2.671833  |
| 51 | 1 | 5.003957  | 0.803611  | -2.672671 |
| 52 | 1 | 3.306677  | 2.188724  | -3.961089 |
| 53 | 1 | -0.339759 | 5.594175  | 1.238230  |
| 54 | 1 | 0.340960  | 5.594388  | -1.237140 |
| 55 | 8 | -1.210972 | -4.038854 | -3.504365 |
| 56 | 8 | 1.210441  | -4.038353 | 3.504983  |
| 57 | 8 | -5.700735 | 0.000652  | -0.000539 |
| 58 | 8 | -1.210440 | 4.038352  | 3.504984  |
| 59 | 8 | 1.210970  | 4.038854  | -3.504365 |
| 60 | 8 | 5.700737  | -0.000649 | -0.000539 |

---



**Table S23.** The optimized Cartesian coordinates of the [14]circulene ketone in the ground singlet state calculated at the B3LYP/6-31(d) level of theory

| Center Number | Atomic Number | Coordinates (Angstroms) |           |           |
|---------------|---------------|-------------------------|-----------|-----------|
|               |               | X                       | Y         | Z         |
| 1             | 6             | 1.814911                | 1.381394  | 0.454722  |
| 2             | 6             | 0.856590                | 2.285524  | -0.013870 |
| 3             | 6             | 0.571082                | -0.402218 | -2.316850 |
| 4             | 6             | 1.189106                | -1.386274 | -1.383654 |
| 5             | 6             | 0.559590                | -2.232603 | -0.459820 |
| 6             | 6             | 1.756149                | 0.258457  | 1.446994  |
| 7             | 6             | 0.734999                | -0.095185 | 2.334804  |
| 8             | 6             | -0.734999               | 0.095185  | 2.334804  |
| 9             | 6             | -0.856590               | -2.285524 | -0.013870 |
| 10            | 6             | -0.571082               | 0.402218  | -2.316850 |
| 11            | 6             | -1.189106               | 1.386274  | -1.383654 |
| 12            | 6             | -0.559590               | 2.232603  | -0.459820 |
| 13            | 6             | 1.246747                | 3.654140  | -0.056123 |
| 14            | 6             | 3.172629                | 1.799450  | 0.385796  |
| 15            | 6             | 4.046059                | 0.757255  | 1.016584  |
| 16            | 6             | 3.087867                | -0.052842 | 1.833274  |
| 17            | 6             | -1.120238               | 3.530029  | -0.279846 |
| 18            | 6             | 0.000000                | 4.488740  | -0.012028 |
| 19            | 6             | -2.410046               | 1.836108  | -1.960931 |
| 20            | 6             | -1.235178               | 0.557245  | -3.566420 |
| 21            | 6             | -2.551744               | 1.234313  | -3.325573 |
| 22            | 6             | 1.235178                | -0.557245 | -3.566420 |
| 23            | 6             | 2.551744                | -1.234313 | -3.325573 |
| 24            | 6             | 2.410046                | -1.836108 | -1.960931 |
| 25            | 6             | 1.120238                | -3.530029 | -0.279846 |
| 26            | 6             | -1.246747               | -3.654140 | -0.056123 |
| 27            | 6             | 0.000000                | -4.488740 | -0.012028 |
| 28            | 6             | -1.121578               | 0.410605  | 3.668029  |
| 29            | 6             | 0.000000                | 0.000000  | 4.576895  |
| 30            | 6             | 1.121578                | -0.410605 | 3.668029  |
| 31            | 6             | -1.814911               | -1.381394 | 0.454722  |
| 32            | 6             | -3.172629               | -1.799450 | 0.385796  |
| 33            | 6             | -1.756149               | -0.258457 | 1.446994  |
| 34            | 6             | -3.087867               | 0.052842  | 1.833274  |
| 35            | 6             | -4.046059               | -0.757255 | 1.016584  |
| 36            | 6             | -2.565304               | -4.075578 | -0.031330 |
| 37            | 6             | -3.566162               | -3.095795 | 0.086910  |
| 38            | 6             | -3.421437               | 0.629073  | 3.052736  |
| 39            | 6             | -2.418021               | 0.741178  | 4.028175  |
| 40            | 6             | 2.418021                | -0.741178 | 4.028175  |
| 41            | 6             | 3.421437                | -0.629073 | 3.052736  |
| 42            | 6             | 2.565304                | 4.075578  | -0.031330 |
| 43            | 6             | 3.566162                | 3.095795  | 0.086910  |
| 44            | 6             | -3.065011               | 2.995644  | -1.568281 |
| 45            | 6             | -2.384902               | 3.885981  | -0.722992 |
| 46            | 6             | 0.663582                | -0.233584 | -4.785550 |
| 47            | 6             | -0.663582               | 0.233584  | -4.785550 |
| 48            | 6             | 2.384902                | -3.885981 | -0.722992 |
| 49            | 6             | 3.065011                | -2.995644 | -1.568281 |
| 50            | 1             | -2.800501               | -5.134043 | -0.086122 |
| 51            | 1             | -4.621854               | -3.349678 | 0.081164  |
| 52            | 1             | -4.465318               | 0.815498  | 3.287366  |
| 53            | 1             | -2.651345               | 0.985120  | 5.060163  |
| 54            | 1             | 2.651345                | -0.985120 | 5.060163  |
| 55            | 1             | 4.465318                | -0.815498 | 3.287366  |
| 56            | 1             | 2.800501                | 5.134043  | -0.086122 |
| 57            | 1             | 4.621854                | 3.349678  | 0.081164  |

|    |   |           |           |           |
|----|---|-----------|-----------|-----------|
| 58 | 1 | -3.991612 | 3.279326  | -2.058657 |
| 59 | 1 | -2.756372 | 4.890925  | -0.545474 |
| 60 | 1 | 1.215112  | -0.402217 | -5.705393 |
| 61 | 1 | -1.215112 | 0.402217  | -5.705393 |
| 62 | 1 | 2.756372  | -4.890925 | -0.545474 |
| 63 | 1 | 3.991612  | -3.279326 | -2.058657 |
| 64 | 8 | 0.067480  | -5.692266 | 0.148010  |
| 65 | 8 | -5.257824 | -0.678309 | 0.977566  |
| 66 | 8 | 0.000000  | 0.000000  | 5.792890  |
| 67 | 8 | 5.257824  | 0.678309  | 0.977566  |
| 68 | 8 | -0.067480 | 5.692266  | 0.148010  |
| 69 | 8 | -3.471670 | 1.352430  | -4.111054 |
| 70 | 8 | 3.471670  | -1.352430 | -4.111054 |

**Table S24.** The optimized Cartesian coordinates of the [16]circulene ketone in the ground singlet state calculated at the B3LYP/6-31(d) level of theory

| Center Number | Atomic Number | Coordinates (Angstroms) |           |           |
|---------------|---------------|-------------------------|-----------|-----------|
|               |               | X                       | Y         | Z         |
| 1             | 6             | 2.231535                | 0.629902  | 1.065268  |
| 2             | 6             | 2.561316                | 0.508132  | -0.291157 |
| 3             | 6             | -1.044723               | -1.084800 | 1.866829  |
| 4             | 6             | -2.231535               | -0.629902 | 1.065268  |
| 5             | 6             | -2.561316               | -0.508132 | -0.291157 |
| 6             | 6             | -0.048165               | 1.915967  | 1.557861  |
| 7             | 6             | -0.508064               | 2.561208  | 0.291171  |
| 8             | 6             | -0.629795               | 2.231426  | -1.065266 |
| 9             | 6             | -1.916078               | -0.048170 | -1.557848 |
| 10            | 6             | 0.508064                | -2.561208 | 0.291171  |
| 11            | 6             | 0.629795                | -2.231426 | -1.065266 |
| 12            | 6             | 1.084852                | -1.044669 | -1.866817 |
| 13            | 6             | 3.896685                | 0.885516  | -0.635476 |
| 14            | 6             | 3.332493                | 0.559626  | 1.972924  |
| 15            | 6             | 0.979061                | -1.401486 | -3.246367 |
| 16            | 6             | 0.559434                | -3.332374 | -1.972913 |
| 17            | 6             | 0.885565                | -3.896548 | 0.635461  |
| 18            | 6             | -1.401498               | -0.979004 | 3.246382  |
| 19            | 6             | -2.811661               | -0.518552 | 3.369151  |
| 20            | 6             | -3.332493               | -0.559626 | 1.972924  |
| 21            | 6             | -3.896685               | -0.885516 | -0.635476 |
| 22            | 6             | -2.665713               | -0.610960 | -2.637494 |
| 23            | 6             | -3.934941               | -1.180959 | -2.098134 |
| 24            | 6             | -0.559434               | 3.332374  | -1.972913 |
| 25            | 6             | -0.885565               | 3.896548  | 0.635461  |
| 26            | 6             | 0.518227                | -2.811522 | -3.369116 |
| 27            | 6             | -1.181051               | 3.934757  | 2.098125  |
| 28            | 6             | -0.979061               | 1.401486  | -3.246367 |
| 29            | 6             | -0.518227               | 2.811522  | -3.369116 |
| 30            | 6             | -1.084852               | 1.044669  | -1.866817 |
| 31            | 6             | 1.044723                | 1.084800  | 1.866829  |
| 32            | 6             | 2.811661                | 0.518552  | 3.369151  |
| 33            | 6             | 1.401498                | 0.979004  | 3.246382  |
| 34            | 6             | 0.048165                | -1.915967 | 1.557861  |
| 35            | 6             | 0.611085                | -2.665506 | 2.637481  |
| 36            | 6             | 1.181051                | -3.934757 | 2.098125  |
| 37            | 6             | 1.916078                | 0.048170  | -1.557848 |
| 38            | 6             | 2.665713                | 0.610960  | -2.637494 |
| 39            | 6             | 3.934941                | 1.180959  | -2.098134 |
| 40            | 6             | 0.327867                | -2.453380 | 3.974975  |

|    |   |           |           |           |
|----|---|-----------|-----------|-----------|
| 41 | 6 | -0.702393 | -1.558798 | 4.290323  |
| 42 | 6 | -4.661558 | -0.682102 | 1.609613  |
| 43 | 6 | -2.453764 | -0.327577 | -3.974979 |
| 44 | 6 | -1.559099 | 0.702610  | -4.290320 |
| 45 | 6 | -0.979061 | 4.939830  | -0.265881 |
| 46 | 6 | 0.702393  | 1.558798  | 4.290323  |
| 47 | 6 | -0.327867 | 2.453380  | 3.974975  |
| 48 | 6 | 4.939972  | 0.978984  | 0.265846  |
| 49 | 6 | 1.559099  | -0.702610 | -4.290320 |
| 50 | 6 | 2.453764  | 0.327577  | -3.974979 |
| 51 | 6 | 0.682020  | -4.661438 | -1.609608 |
| 52 | 6 | 0.979061  | -4.939830 | -0.265881 |
| 53 | 1 | 0.806657  | -3.069423 | 4.730019  |
| 54 | 1 | -1.056870 | -1.426596 | 5.308213  |
| 55 | 1 | -3.069943 | -0.806252 | -4.729985 |
| 56 | 1 | -1.426927 | 1.057157  | -5.308188 |
| 57 | 1 | -1.250058 | 5.933061  | 0.078348  |
| 58 | 1 | 1.056870  | 1.426596  | 5.308213  |
| 59 | 1 | -0.806657 | 3.069423  | 4.730019  |
| 60 | 1 | 1.426927  | -1.057157 | -5.308188 |
| 61 | 1 | 3.069943  | 0.806252  | -4.729985 |
| 62 | 1 | 0.640818  | -5.434452 | -2.370654 |
| 63 | 1 | 1.250058  | -5.933061 | 0.078348  |
| 64 | 6 | 4.661558  | 0.682102  | 1.609613  |
| 65 | 6 | -0.682020 | 4.661438  | -1.609608 |
| 66 | 1 | -0.640818 | 5.434452  | -2.370654 |
| 67 | 6 | -4.939972 | -0.978984 | 0.265846  |
| 68 | 1 | -5.434581 | -0.640977 | 2.370654  |
| 69 | 1 | -5.933216 | -1.249902 | -0.078407 |
| 70 | 1 | 5.933216  | 1.249902  | -0.078407 |
| 71 | 1 | 5.434581  | 0.640977  | 2.370654  |
| 72 | 6 | -0.611085 | 2.665506  | 2.637481  |
| 73 | 8 | 0.262026  | -3.433003 | -4.383848 |
| 74 | 8 | 1.711092  | -4.838766 | 2.716428  |
| 75 | 8 | -3.433004 | -0.261817 | 4.383828  |
| 76 | 8 | -4.838903 | -1.711098 | -2.716433 |
| 77 | 8 | -0.262026 | 3.433003  | -4.383848 |
| 78 | 8 | -1.711092 | 4.838766  | 2.716428  |
| 79 | 8 | 3.433004  | 0.261817  | 4.383828  |
| 80 | 8 | 4.838903  | 1.711098  | -2.716433 |

**Table S25.** The optimized Cartesian coordinates of the [18]circulene ketone in the ground singlet state calculated at the B3LYP/6-31(d) level of theory

| Center<br>Number | Atomic<br>Number | Coordinates (Angstroms) |           |           |
|------------------|------------------|-------------------------|-----------|-----------|
|                  |                  | X                       | Y         | Z         |
| 1                | 6                | -0.017939               | 0.758070  | 2.686482  |
| 2                | 6                | 0.017939                | -0.758070 | 2.686482  |
| 3                | 6                | -0.393698               | 1.872855  | -1.852841 |
| 4                | 6                | -0.021477               | 0.706112  | -2.757187 |
| 5                | 6                | 0.021477                | -0.706112 | -2.757187 |
| 6                | 6                | 1.432411                | 2.102419  | 0.756167  |
| 7                | 6                | 2.440648                | 1.389200  | 0.062530  |
| 8                | 6                | 2.933732                | -0.039369 | 0.015502  |
| 9                | 6                | 0.393698                | -1.872855 | -1.852841 |
| 10               | 6                | -2.933732               | 0.039369  | 0.015502  |
| 11               | 6                | -2.440648               | -1.389200 | 0.062530  |
| 12               | 6                | -1.432411               | -2.102419 | 0.756167  |
| 13               | 6                | 0.375067                | -1.116494 | 4.034721  |
| 14               | 6                | -0.375067               | 1.116494  | 4.034721  |

|    |   |           |           |           |
|----|---|-----------|-----------|-----------|
| 15 | 6 | 1.511636  | 3.528996  | 0.624073  |
| 16 | 6 | -1.511636 | -3.528996 | 0.624073  |
| 17 | 6 | -3.512381 | -2.180719 | -0.478984 |
| 18 | 6 | -4.368677 | -0.054049 | 0.029086  |
| 19 | 6 | -4.756487 | -1.379015 | -0.502954 |
| 20 | 6 | 0.118280  | 3.047614  | -2.511313 |
| 21 | 6 | 0.624575  | 2.711352  | -3.857055 |
| 22 | 6 | 0.284727  | 1.287458  | -4.037181 |
| 23 | 6 | -0.284727 | -1.287458 | -4.037181 |
| 24 | 6 | -0.118280 | -3.047614 | -2.511313 |
| 25 | 6 | -0.624575 | -2.711352 | -3.857055 |
| 26 | 6 | 4.368677  | 0.054049  | 0.029086  |
| 27 | 6 | 4.756487  | 1.379015  | -0.502954 |
| 28 | 6 | 3.512381  | 2.180719  | -0.478984 |
| 29 | 6 | 0.000000  | 0.000000  | 4.932373  |
| 30 | 6 | 3.343247  | -2.347689 | 0.423538  |
| 31 | 6 | 0.411070  | 1.836843  | 1.879601  |
| 32 | 6 | 0.000000  | 3.127046  | 2.358811  |
| 33 | 6 | 0.567787  | 4.206163  | 1.532444  |
| 34 | 6 | -2.440797 | 1.355809  | -0.090061 |
| 35 | 6 | -3.343247 | 2.347689  | 0.423538  |
| 36 | 6 | -0.411070 | -1.836843 | 1.879601  |
| 37 | 6 | 0.000000  | -3.127046 | 2.358811  |
| 38 | 6 | -0.567787 | -4.206163 | 1.532444  |
| 39 | 6 | -1.537312 | 3.502417  | -0.486807 |
| 40 | 6 | -2.705684 | 3.674801  | 0.400300  |
| 41 | 6 | -1.322337 | 2.116388  | -0.804967 |
| 42 | 6 | 1.537312  | -3.502417 | -0.486807 |
| 43 | 6 | 2.705684  | -3.674801 | 0.400300  |
| 44 | 6 | 1.322337  | -2.116388 | -0.804967 |
| 45 | 6 | 2.440797  | -1.355809 | -0.090061 |
| 46 | 6 | -0.941702 | 4.597889  | -1.075323 |
| 47 | 6 | -0.087704 | 4.360227  | -2.148176 |
| 48 | 6 | 0.224037  | 0.661419  | -5.263956 |
| 49 | 6 | -0.224037 | -0.661419 | -5.263956 |
| 50 | 6 | -5.247498 | 0.948227  | 0.377027  |
| 51 | 6 | -4.682000 | 2.178462  | 0.718068  |
| 52 | 6 | -2.455729 | -4.251387 | -0.078981 |
| 53 | 6 | -3.527549 | -3.551846 | -0.623810 |
| 54 | 6 | 0.738577  | -2.370481 | 4.475458  |
| 55 | 6 | 0.635024  | -3.410794 | 3.553658  |
| 56 | 6 | -0.635024 | 3.410794  | 3.553658  |
| 57 | 6 | -0.738577 | 2.370481  | 4.475458  |
| 58 | 6 | 3.527549  | 3.551846  | -0.623810 |
| 59 | 6 | 2.455729  | 4.251387  | -0.078981 |
| 60 | 6 | 4.682000  | -2.178462 | 0.718068  |
| 61 | 6 | 5.247498  | -0.948227 | 0.377027  |
| 62 | 6 | 0.087704  | -4.360227 | -2.148176 |
| 63 | 6 | 0.941702  | -4.597889 | -1.075323 |
| 64 | 1 | -1.208674 | 5.591848  | -0.732389 |
| 65 | 1 | 0.343614  | 5.152346  | -2.752287 |
| 66 | 1 | 0.458939  | 1.218187  | -6.165365 |
| 67 | 1 | -0.458939 | -1.218187 | -6.165365 |
| 68 | 1 | -6.316247 | 0.759521  | 0.372332  |
| 69 | 1 | -5.258276 | 3.022620  | 1.083058  |
| 70 | 1 | -2.393004 | -5.335150 | -0.080424 |
| 71 | 1 | -4.400005 | -4.037381 | -1.049652 |
| 72 | 1 | 1.011671  | -2.521000 | 5.515156  |
| 73 | 1 | 0.889948  | -4.440494 | 3.782954  |
| 74 | 1 | -0.889948 | 4.440494  | 3.782954  |
| 75 | 1 | -1.011671 | 2.521000  | 5.515156  |
| 76 | 1 | 4.400005  | 4.037381  | -1.049652 |
| 77 | 1 | 2.393004  | 5.335150  | -0.080424 |

|    |   |           |           |           |
|----|---|-----------|-----------|-----------|
| 78 | 1 | 5.258276  | -3.022620 | 1.083058  |
| 79 | 1 | 6.316247  | -0.759521 | 0.372332  |
| 80 | 1 | -0.343614 | -5.152346 | -2.752287 |
| 81 | 1 | 1.208674  | -5.591848 | -0.732389 |
| 82 | 8 | 0.000000  | 0.000000  | 6.150945  |
| 83 | 8 | 0.383403  | 5.406862  | 1.649455  |
| 84 | 8 | 5.871523  | 1.738160  | -0.838569 |
| 85 | 8 | 3.104604  | -4.702540 | 0.920278  |
| 86 | 8 | -0.383403 | -5.406862 | 1.649455  |
| 87 | 8 | -1.141200 | -3.457220 | -4.671354 |
| 88 | 8 | 1.141200  | 3.457220  | -4.671354 |
| 89 | 8 | -3.104604 | 4.702540  | 0.920278  |
| 90 | 8 | -5.871523 | -1.738160 | -0.838569 |

**Table S26.** The optimized Cartesian coordinates of the [20]circulene ketone in the ground singlet state calculated at the B3LYP/6-31(d) level of theory

| Center<br>Number | Atomic<br>Number | Coordinates (Angstroms) |           |           |
|------------------|------------------|-------------------------|-----------|-----------|
|                  |                  | X                       | Y         | Z         |
| 1                | 6                | 1.424040                | -0.759454 | -3.824586 |
| 2                | 6                | 2.475215                | 0.215299  | -4.124784 |
| 3                | 6                | 2.985141                | 0.145667  | -0.495195 |
| 4                | 6                | 4.386786                | 0.499904  | -0.593919 |
| 5                | 6                | 5.111745                | -0.197072 | 0.480547  |
| 6                | 6                | 4.067027                | -0.667257 | 1.406064  |
| 7                | 6                | 2.798568                | -0.100425 | 1.004792  |
| 8                | 6                | 5.015132                | 1.113021  | -1.650270 |
| 9                | 6                | 4.258209                | 1.241291  | -2.807275 |
| 10               | 6                | 3.059674                | 0.556196  | -2.834053 |
| 11               | 6                | 2.360690                | -0.086091 | -1.745983 |
| 12               | 1                | 4.624902                | 1.696539  | -3.723302 |
| 13               | 1                | 6.068569                | 1.372476  | -1.586379 |
| 14               | 6                | 4.386786                | -1.217026 | 2.625856  |
| 15               | 6                | 3.459749                | -1.021688 | 3.636204  |
| 16               | 6                | 2.390292                | -0.196322 | 3.352569  |
| 17               | 6                | 1.972525                | 0.332607  | 2.078177  |
| 18               | 1                | 5.371227                | -1.648262 | 2.787163  |
| 19               | 1                | 3.614542                | -1.344503 | 4.662437  |
| 20               | 6                | 1.250421                | -0.972980 | -2.409302 |
| 21               | 6                | 1.653965                | 0.401334  | 4.460750  |
| 22               | 6                | 0.745759                | 1.369493  | 3.844472  |
| 23               | 6                | 0.844821                | 1.375909  | 2.406487  |
| 24               | 6                | -0.026251               | 2.160870  | 4.667897  |
| 25               | 6                | -0.800382               | 3.135967  | 4.063689  |
| 26               | 6                | -0.720367               | 3.215674  | 2.692948  |
| 27               | 6                | 0.017019                | 2.361607  | 1.790039  |
| 28               | 1                | 0.035111                | 2.013388  | 5.742454  |
| 29               | 1                | -1.386499               | 3.869375  | 4.611421  |
| 30               | 6                | -1.097863               | 4.480723  | 2.041489  |
| 31               | 6                | -0.366369               | 4.453517  | 0.767084  |
| 32               | 6                | -0.063583               | 3.078502  | 0.445063  |
| 33               | 6                | -0.002576               | 5.575654  | 0.060937  |
| 34               | 6                | 0.754919                | 5.340911  | -1.086737 |
| 35               | 6                | 0.754014                | 4.042574  | -1.545599 |
| 36               | 6                | 0.139627                | 2.887804  | -0.938932 |
| 37               | 1                | -0.271547               | 6.564108  | 0.422402  |
| 38               | 1                | 1.246283                | 6.119873  | -1.662860 |
| 39               | 6                | 1.241059                | 3.687540  | -2.880837 |
| 40               | 6                | 0.437681                | 2.508512  | -3.239072 |
| 41               | 6                | -0.254920               | 1.955674  | -2.099155 |

|     |   |           |           |           |
|-----|---|-----------|-----------|-----------|
| 42  | 6 | 0.234433  | 2.252770  | -4.576169 |
| 43  | 6 | -0.765967 | 1.348689  | -4.880894 |
| 44  | 6 | -1.424040 | 0.759454  | -3.824586 |
| 45  | 6 | -1.250421 | 0.972980  | -2.409302 |
| 46  | 1 | 0.826661  | 2.779539  | -5.319062 |
| 47  | 1 | -1.053848 | 1.078390  | -5.893416 |
| 48  | 6 | -2.360690 | 0.086091  | -1.745983 |
| 49  | 6 | -3.059674 | -0.556196 | -2.834053 |
| 50  | 6 | -2.475215 | -0.215299 | -4.124784 |
| 51  | 6 | -4.258209 | -1.241291 | -2.807275 |
| 52  | 6 | -5.015132 | -1.113021 | -1.650270 |
| 53  | 6 | -4.386786 | -0.499904 | -0.593919 |
| 54  | 6 | -2.985141 | -0.145667 | -0.495195 |
| 55  | 1 | -4.624902 | -1.696539 | -3.723302 |
| 56  | 1 | -6.068569 | -1.372476 | -1.586379 |
| 57  | 6 | -5.111745 | 0.197072  | 0.480547  |
| 58  | 6 | -4.067027 | 0.667257  | 1.406064  |
| 59  | 6 | -2.798568 | 0.100425  | 1.004792  |
| 60  | 6 | -4.386786 | 1.217026  | 2.625856  |
| 61  | 6 | -3.459749 | 1.021688  | 3.636204  |
| 62  | 6 | -2.390292 | 0.196322  | 3.352569  |
| 63  | 6 | -1.972525 | -0.332607 | 2.078177  |
| 64  | 1 | -5.371227 | 1.648262  | 2.787163  |
| 65  | 1 | -3.614542 | 1.344503  | 4.662437  |
| 66  | 6 | 0.254920  | -1.955674 | -2.099155 |
| 67  | 6 | -0.437681 | -2.508512 | -3.239072 |
| 68  | 6 | -0.234433 | -2.252770 | -4.576169 |
| 69  | 6 | 0.765967  | -1.348689 | -4.880894 |
| 70  | 1 | 1.053848  | -1.078390 | -5.893416 |
| 71  | 1 | -0.826661 | -2.779539 | -5.319062 |
| 72  | 6 | -1.241059 | -3.687540 | -2.880837 |
| 73  | 6 | -0.754014 | -4.042574 | -1.545599 |
| 74  | 6 | -0.139627 | -2.887804 | -0.938932 |
| 75  | 6 | -0.754919 | -5.340911 | -1.086737 |
| 76  | 6 | 0.002576  | -5.575654 | 0.060937  |
| 77  | 6 | 0.366369  | -4.453517 | 0.767084  |
| 78  | 6 | 0.063583  | -3.078502 | 0.445063  |
| 79  | 6 | 1.097863  | -4.480723 | 2.041489  |
| 80  | 6 | 0.720367  | -3.215674 | 2.692948  |
| 81  | 6 | -0.017019 | -2.361607 | 1.790039  |
| 82  | 1 | 0.271547  | -6.564108 | 0.422402  |
| 83  | 1 | -1.246283 | -6.119873 | -1.662860 |
| 84  | 6 | 0.800382  | -3.135967 | 4.063689  |
| 85  | 6 | 0.026251  | -2.160870 | 4.667897  |
| 86  | 6 | -0.745759 | -1.369493 | 3.844472  |
| 87  | 6 | -0.844821 | -1.375909 | 2.406487  |
| 88  | 6 | -1.653965 | -0.401334 | 4.460750  |
| 89  | 1 | -0.035111 | -2.013388 | 5.742454  |
| 90  | 1 | 1.386499  | -3.869375 | 4.611421  |
| 91  | 8 | 6.318086  | -0.335949 | 0.586682  |
| 92  | 8 | 1.813953  | 0.197912  | 5.655786  |
| 93  | 8 | 2.827463  | 0.599090  | -5.231040 |
| 94  | 8 | -2.063562 | -4.277392 | -3.559808 |
| 95  | 8 | 1.799686  | -5.377750 | 2.474046  |
| 96  | 8 | -6.318086 | 0.335949  | 0.586682  |
| 97  | 8 | -1.813953 | -0.197912 | 5.655786  |
| 98  | 8 | -1.799686 | 5.377750  | 2.474046  |
| 99  | 8 | 2.063562  | 4.277392  | -3.559808 |
| 100 | 8 | -2.827463 | -0.599090 | -5.231040 |

---

**Table S27.** The optimized Cartesian coordinates of the [22]circulene ketone in the ground singlet state calculated at the B3LYP/6-31(d) level of theory

| Center Number | Atomic Number | Coordinates (Angstroms) |           |           |
|---------------|---------------|-------------------------|-----------|-----------|
|               |               | X                       | Y         | Z         |
| 1             | 6             | -1.069071               | 4.066665  | -2.082551 |
| 2             | 6             | -0.447449               | 4.554095  | -0.953159 |
| 3             | 6             | 0.085250                | 3.624354  | -0.079409 |
| 4             | 6             | 0.001520                | 2.187695  | -0.098290 |
| 5             | 6             | -0.846912               | 1.694649  | -1.189740 |
| 6             | 6             | -1.188773               | 2.696269  | -2.168847 |
| 7             | 1             | -1.406324               | 4.680495  | -2.911569 |
| 8             | 1             | -0.292459               | 5.607254  | -0.743216 |
| 9             | 6             | 0.807551                | 4.152983  | 1.082599  |
| 10            | 6             | 1.136280                | 2.998162  | 1.908282  |
| 11            | 6             | 0.884401                | 1.763207  | 1.222918  |
| 12            | 6             | -1.398206               | 0.376154  | -1.887439 |
| 13            | 6             | -1.399940               | 0.653220  | -3.298424 |
| 14            | 6             | -1.482291               | 2.103577  | -3.487060 |
| 15            | 6             | 1.550378                | 3.205838  | 3.213350  |
| 16            | 6             | 1.629431                | 2.093265  | 4.036948  |
| 17            | 6             | 1.531863                | 0.875575  | 3.399541  |
| 18            | 6             | 1.407509                | 0.652203  | 1.982662  |
| 19            | 1             | 1.692349                | 4.226015  | 3.554204  |
| 20            | 1             | 1.771959                | 2.135828  | 5.111896  |
| 21            | 6             | 1.523015                | -0.422272 | 4.134473  |
| 22            | 6             | 1.754069                | -1.451976 | 3.101714  |
| 23            | 6             | 1.964307                | -0.771378 | 1.861293  |
| 24            | 6             | 2.195382                | -2.734500 | 3.395364  |
| 25            | 6             | 3.094588                | -3.352664 | 2.518314  |
| 26            | 6             | 3.566294                | -2.581629 | 1.468171  |
| 27            | 6             | 3.005119                | -1.325197 | 1.098438  |
| 28            | 6             | 4.974044                | -2.670835 | 0.948894  |
| 29            | 6             | 5.257870                | -1.297690 | 0.420165  |
| 30            | 6             | 4.020969                | -0.618308 | 0.302226  |
| 31            | 1             | 3.565750                | -4.302076 | 2.754025  |
| 32            | 1             | 1.970967                | -3.157577 | 4.370139  |
| 33            | 6             | 6.476322                | -0.683086 | 0.171618  |
| 34            | 6             | 6.476141                | 0.683139  | -0.174668 |
| 35            | 6             | 5.257490                | 1.297567  | -0.422685 |
| 36            | 6             | 4.020732                | 0.618025  | -0.304153 |
| 37            | 1             | 7.401236                | -1.238316 | 0.294492  |
| 38            | 1             | 7.400921                | 1.238483  | -0.298026 |
| 39            | 6             | 4.973305                | 2.670581  | -0.951531 |
| 40            | 6             | 3.565223                | 2.581264  | -1.469926 |
| 41            | 6             | 3.004352                | 1.324809  | -1.099828 |
| 42            | 6             | 3.092894                | 3.352256  | -2.519819 |
| 43            | 6             | 2.193279                | 2.733991  | -3.396366 |
| 44            | 6             | 1.752170                | 1.451470  | -3.102368 |
| 45            | 6             | 1.963026                | 0.770992  | -1.861993 |
| 46            | 6             | 1.405848                | -0.652509 | -1.982977 |
| 47            | 6             | 1.529288                | -0.876073 | -3.399824 |
| 48            | 6             | 1.520556                | 0.421708  | -4.134915 |
| 49            | 1             | 3.563927                | 4.301655  | -2.755830 |
| 50            | 1             | 1.968306                | 3.156969  | -4.371055 |
| 51            | 6             | -2.016092               | -0.888390 | -1.650133 |
| 52            | 6             | -1.914724               | -1.868861 | -2.688980 |
| 53            | 6             | -1.601146               | -1.603100 | -4.008077 |
| 54            | 6             | -1.495268               | -0.252167 | -4.338618 |
| 55            | 1             | -1.470335               | 0.113031  | -5.359602 |
| 56            | 1             | -1.596422               | -2.402212 | -4.741987 |
| 57            | 6             | -2.540122               | -3.165767 | -2.261166 |

|     |   |           |           |           |
|-----|---|-----------|-----------|-----------|
| 58  | 6 | -3.130106 | -1.424093 | -0.794778 |
| 59  | 6 | -3.465329 | -2.750479 | -1.174358 |
| 60  | 6 | 0.883045  | -1.763365 | -1.222699 |
| 61  | 6 | 1.134303  | -2.998434 | -1.908059 |
| 62  | 6 | 1.547382  | -3.206331 | -3.213442 |
| 63  | 6 | 1.626041  | -2.093892 | -4.037203 |
| 64  | 1 | 1.767831  | -2.136542 | -5.112246 |
| 65  | 1 | 1.688860  | -4.226590 | -3.554256 |
| 66  | 6 | 0.806038  | -4.153095 | -1.081913 |
| 67  | 6 | 0.084635  | -3.624179 | 0.080551  |
| 68  | 6 | 0.000959  | -2.187535 | 0.098964  |
| 69  | 6 | -0.846706 | -1.694068 | 1.190738  |
| 70  | 6 | -1.187738 | -2.695128 | 2.170649  |
| 71  | 6 | -1.068069 | -4.065561 | 2.084865  |
| 72  | 6 | -0.447431 | -4.553513 | 0.955113  |
| 73  | 1 | -0.292655 | -5.606780 | 0.745547  |
| 74  | 1 | -1.404575 | -4.679047 | 2.914444  |
| 75  | 6 | -1.480032 | -2.101582 | 3.488774  |
| 76  | 6 | -1.397501 | -0.375184 | 1.887900  |
| 77  | 6 | -1.397810 | -0.651307 | 3.299146  |
| 78  | 6 | -1.492298 | 0.254789  | 4.338769  |
| 79  | 6 | -1.599290 | 1.605474  | 4.007421  |
| 80  | 6 | -1.914356 | 1.870193  | 2.688506  |
| 81  | 6 | -2.015993 | 0.888952  | 1.650353  |
| 82  | 1 | -1.594206 | 2.405066  | 4.740811  |
| 83  | 1 | -1.466217 | -0.109683 | 5.359986  |
| 84  | 6 | -2.540999 | 3.166390  | 2.260415  |
| 85  | 6 | -3.466684 | 2.749857  | 1.174480  |
| 86  | 6 | -3.130765 | 1.423540  | 0.795302  |
| 87  | 6 | -4.716733 | 3.315615  | 0.947434  |
| 88  | 6 | -5.763698 | 2.504826  | 0.465093  |
| 89  | 6 | -5.466378 | 1.188326  | 0.155823  |
| 90  | 6 | -4.139161 | 0.695839  | 0.192789  |
| 91  | 6 | -4.138717 | -0.697305 | -0.191518 |
| 92  | 6 | -5.465542 | -1.190807 | -0.154019 |
| 93  | 6 | -5.762115 | -2.507397 | -0.463639 |
| 94  | 6 | -4.714843 | -3.317244 | -0.946855 |
| 95  | 6 | -6.382459 | -0.001628 | 0.001279  |
| 96  | 1 | -6.785944 | 2.868266  | 0.424671  |
| 97  | 1 | -4.908774 | 4.327703  | 1.291838  |
| 98  | 1 | -6.784099 | -2.871522 | -0.422762 |
| 99  | 1 | -4.906319 | -4.329321 | -1.291608 |
| 100 | 8 | 5.740528  | 3.609578  | -1.033247 |
| 101 | 8 | 5.741515  | -3.609652 | 1.030386  |
| 102 | 8 | -2.401935 | -4.250039 | -2.792047 |
| 103 | 8 | 1.451256  | -0.560701 | 5.342650  |
| 104 | 8 | 1.060470  | 5.324304  | 1.315663  |
| 105 | 8 | -1.733221 | 2.701901  | -4.520061 |
| 106 | 8 | 1.448421  | 0.559989  | -5.343086 |
| 107 | 8 | 1.058925  | -5.324463 | -1.314776 |
| 108 | 8 | -7.597263 | -0.002063 | 0.001384  |
| 109 | 8 | -2.403460 | 4.251004  | 2.790780  |
| 110 | 8 | -1.729802 | -2.699236 | 4.522439  |

---



**Table S28.** The optimized Cartesian coordinates of the [24]circulene ketone in the ground singlet state calculated at the B3LYP/6-31(d) level of theory

| Center Number | Atomic Number | Coordinates (Angstroms) |           |           |
|---------------|---------------|-------------------------|-----------|-----------|
|               |               | X                       | Y         | Z         |
| 1             | 6             | 3.735070                | -3.135275 | 0.303513  |
| 2             | 6             | -0.102307               | -2.836896 | -1.456447 |
| 3             | 6             | -0.513476               | -3.416072 | -0.249860 |
| 4             | 6             | -0.546714               | -3.036497 | 1.182278  |
| 5             | 6             | -0.252563               | -4.212734 | 1.933787  |
| 6             | 6             | -0.493861               | -5.389219 | 1.032076  |
| 7             | 6             | -0.846491               | -4.801647 | -0.306452 |
| 8             | 6             | 3.774481                | 1.886941  | 1.937478  |
| 9             | 6             | 4.915071                | 2.265990  | 1.037030  |
| 10            | 6             | 4.583307                | 1.667828  | -0.302148 |
| 11            | 6             | 3.216710                | 1.263797  | -0.247057 |
| 12            | 6             | 2.903453                | 1.044586  | 1.184697  |
| 13            | 6             | 3.756183                | 1.955846  | 3.321043  |
| 14            | 6             | 2.970737                | 1.023543  | 4.016519  |
| 15            | 6             | 2.399359                | -0.016214 | 3.289152  |
| 16            | 6             | 2.359893                | -0.058546 | 1.866957  |
| 17            | 1             | 2.974235                | 0.977335  | 5.100907  |
| 18            | 1             | 4.430932                | 2.627056  | 3.843705  |
| 19            | 6             | 5.330681                | 1.659593  | -1.467456 |
| 20            | 6             | 4.677742                | 1.287717  | -2.656416 |
| 21            | 6             | 2.510727                | 1.330925  | -1.454228 |
| 22            | 6             | 3.292169                | 1.202657  | -2.635155 |
| 23            | 1             | 5.205114                | 1.219326  | -3.603089 |
| 24            | 1             | 6.373773                | 1.959887  | -1.454345 |
| 25            | 6             | 1.230886                | 2.015379  | -1.865240 |
| 26            | 6             | 1.214524                | 2.072743  | -3.287456 |
| 27            | 6             | 2.405529                | 1.348852  | -3.835522 |
| 28            | 6             | 0.600105                | 3.088503  | -4.013634 |
| 29            | 6             | 0.184610                | 4.233700  | -3.316660 |
| 30            | 6             | 0.252964                | 4.213143  | -1.933165 |
| 31            | 6             | 0.547021                | 3.036762  | -1.181863 |
| 32            | 6             | 0.494157                | 5.389402  | -1.031213 |
| 33            | 6             | 0.846582                | 4.801541  | 0.307207  |
| 34            | 6             | 0.513572                | 3.415938  | 0.250370  |
| 35            | 1             | -0.059197               | 5.154378  | -3.838066 |
| 36            | 1             | 0.642686                | 3.070143  | -5.098020 |
| 37            | 6             | 1.226839                | 5.443331  | 1.473444  |
| 38            | 6             | 1.222375                | 4.690455  | 2.661520  |
| 39            | 6             | 0.603777                | 3.447798  | 2.638523  |
| 40            | 6             | 0.102058                | 2.836655  | 1.456783  |
| 41            | 6             | 0.034046                | 2.751129  | 3.837921  |
| 42            | 6             | -1.188713               | 2.082953  | 3.289048  |
| 43            | 6             | -1.130880               | 2.070391  | 1.866878  |
| 44            | 1             | 1.544938                | 5.111923  | 3.608774  |
| 45            | 1             | 1.487853                | 6.496969  | 1.461843  |
| 46            | 6             | -2.375651               | 2.058591  | 4.015196  |
| 47            | 6             | -3.574940               | 2.273389  | 3.318528  |
| 48            | 6             | -2.357446               | 1.990463  | 1.183408  |
| 49            | 6             | -3.523077               | 2.323790  | 1.935055  |
| 50            | 1             | -2.338503               | 2.084523  | 5.099627  |
| 51            | 1             | -4.493969               | 2.522591  | 3.840298  |
| 52            | 6             | -4.420401               | 3.122818  | 1.034091  |
| 53            | 6             | -3.735077               | 3.135235  | -0.304296 |
| 54            | 6             | -2.702283               | 2.153336  | -0.248591 |
| 55            | 6             | -4.100217               | 3.787140  | -1.469748 |
| 56            | 6             | -3.450844               | 3.407675  | -2.658292 |
| 57            | 6             | -2.684496               | 2.250168  | -2.636606 |
| 58            | 6             | -2.406550               | 1.508726  | -1.455641 |
| 59            | 1             | -3.654645               | 3.898721  | -3.605049 |
| 60            | 1             | -4.881859               | 4.540318  | -1.457230 |
| 61            | 6             | -2.359618               | 0.058334  | -1.867106 |
| 62            | 6             | -2.398924               | 0.015845  | -3.289291 |
| 63            | 6             | -2.366340               | 1.409422  | -3.836788 |
| 64            | 6             | -2.970452               | -1.023906 | -4.016570 |

|     |   |           |           |           |
|-----|---|-----------|-----------|-----------|
| 65  | 6 | -2.903300 | -1.044667 | -1.184768 |
| 66  | 6 | -3.774255 | -1.887121 | -1.937481 |
| 67  | 6 | -3.755980 | -1.956121 | -3.321036 |
| 68  | 1 | -2.973902 | -0.977789 | -5.100963 |
| 69  | 1 | -4.430753 | -2.627345 | -3.843640 |
| 70  | 6 | -3.216512 | -1.263759 | 0.247040  |
| 71  | 6 | -4.583091 | -1.667960 | 0.302106  |
| 72  | 6 | -4.914812 | -2.266216 | -1.037046 |
| 73  | 6 | -2.510559 | -1.330730 | 1.454269  |
| 74  | 6 | -3.292113 | -1.202440 | 2.635131  |
| 75  | 6 | -4.677677 | -1.287675 | 2.656325  |
| 76  | 6 | -5.330529 | -1.659662 | 1.467364  |
| 77  | 1 | -5.205121 | -1.219241 | 3.602955  |
| 78  | 1 | -6.373608 | -1.960003 | 1.454237  |
| 79  | 6 | -2.405530 | -1.348427 | 3.835584  |
| 80  | 6 | -1.230666 | -2.015008 | 1.865452  |
| 81  | 6 | -1.214391 | -2.072164 | 3.287687  |
| 82  | 6 | -0.599842 | -3.087718 | 4.014044  |
| 83  | 6 | -0.184169 | -4.232980 | 3.317282  |
| 84  | 1 | 0.059746  | -5.153532 | 3.838870  |
| 85  | 1 | -0.642470 | -3.069195 | 5.098427  |
| 86  | 6 | -0.604280 | -3.448130 | -2.638023 |
| 87  | 6 | -1.222805 | -4.690827 | -2.660729 |
| 88  | 6 | -1.226928 | -5.443590 | -1.472562 |
| 89  | 1 | -1.487911 | -6.497232 | -1.460841 |
| 90  | 1 | -1.545572 | -5.112426 | -3.607854 |
| 91  | 6 | 1.130399  | -2.070494 | -1.866854 |
| 92  | 6 | 1.187801  | -2.082914 | -3.289048 |
| 93  | 6 | -0.034908 | -2.751434 | -3.837578 |
| 94  | 6 | 2.357083  | -1.990447 | -1.183705 |
| 95  | 6 | 3.522569  | -2.323479 | -1.935705 |
| 96  | 6 | 3.574079  | -2.272870 | -3.319172 |
| 97  | 6 | 2.374533  | -2.058240 | -4.015513 |
| 98  | 1 | 2.337074  | -2.084133 | -5.099933 |
| 99  | 1 | 4.492989  | -2.521957 | -3.841208 |
| 100 | 6 | 4.420149  | -3.122670 | -1.035063 |
| 101 | 6 | 2.702259  | -2.153420 | 0.248170  |
| 102 | 6 | 4.100470  | -3.787283 | 1.468831  |
| 103 | 6 | 3.451261  | -3.408027 | 2.657521  |
| 104 | 6 | 2.684988  | -2.250476 | 2.636158  |
| 105 | 6 | 2.406773  | -1.508892 | 1.455346  |
| 106 | 1 | 3.655265  | -3.899219 | 3.604156  |
| 107 | 1 | 4.882086  | -4.540484 | 1.456080  |
| 108 | 6 | 2.367098  | -1.409854 | 3.836517  |
| 109 | 8 | 2.266486  | -1.774445 | 4.990908  |
| 110 | 8 | 0.453334  | 6.568543  | -1.323488 |
| 111 | 8 | -2.265575 | 1.773859  | -4.991154 |
| 112 | 8 | -5.915532 | -2.890405 | -1.330762 |
| 113 | 8 | -0.453020 | -6.568250 | 1.324532  |
| 114 | 8 | -2.671537 | -1.080730 | 4.990258  |
| 115 | 8 | -5.461369 | 3.677805  | 1.327077  |
| 116 | 8 | 0.399271  | 2.845329  | 4.992617  |
| 117 | 8 | 5.461073  | -3.677474 | -1.328352 |
| 118 | 8 | -0.400488 | -2.845620 | -4.992208 |
| 119 | 8 | 5.915846  | 2.890097  | 1.330764  |
| 120 | 8 | 2.671298  | 1.080968  | -4.990257 |

**Table S29.** The optimized Cartesian coordinates of the [26]circulene ketone in the ground singlet state calculated at the B3LYP/6-31(d) level of theory

| Center Number | Atomic Number | Coordinates (Angstroms) |           |          |
|---------------|---------------|-------------------------|-----------|----------|
|               |               | X                       | Y         | Z        |
| 1             | 6             | -4.244898               | -1.691343 | 3.380972 |
| 2             | 6             | -4.144452               | -1.843485 | 2.013215 |
| 3             | 6             | -2.931003               | -1.693075 | 1.261915 |
| 4             | 6             | -1.734137               | -1.802722 | 1.997140 |
| 5             | 6             | -1.862510               | -1.623397 | 3.408966 |

|    |   |           |           |           |
|----|---|-----------|-----------|-----------|
| 6  | 6 | -3.057851 | -1.486909 | 4.094921  |
| 7  | 1 | -3.044523 | -1.387677 | 5.175493  |
| 8  | 1 | -5.202579 | -1.817283 | 3.875716  |
| 9  | 6 | -5.135320 | -2.555336 | 1.153761  |
| 10 | 6 | -4.468111 | -2.713197 | -0.171678 |
| 11 | 6 | -3.304261 | -1.879143 | -0.170655 |
| 12 | 6 | -4.944609 | -3.389189 | -1.278260 |
| 13 | 6 | -4.252320 | -3.207188 | -2.483121 |
| 14 | 6 | -3.318755 | -2.184957 | -2.533872 |
| 15 | 6 | -2.926179 | -1.376420 | -1.425344 |
| 16 | 1 | -4.511196 | -3.739153 | -3.393358 |
| 17 | 1 | -5.827945 | -4.014992 | -1.198662 |
| 18 | 6 | -2.544044 | -0.024635 | -2.006094 |
| 19 | 6 | -2.453158 | -0.195215 | -3.423203 |
| 20 | 6 | -2.796563 | -1.597177 | -3.797466 |
| 21 | 6 | -2.820367 | 1.287978  | -1.556078 |
| 22 | 6 | -3.246530 | 2.222163  | -2.555229 |
| 23 | 6 | -3.070882 | 2.055101  | -3.916304 |
| 24 | 6 | -2.595279 | 0.817857  | -4.360654 |
| 25 | 1 | -2.534555 | 0.568169  | -5.415784 |
| 26 | 1 | -3.417906 | 2.822772  | -4.601253 |
| 27 | 6 | -4.279747 | 3.119492  | -1.957060 |
| 28 | 6 | -3.285411 | 1.836869  | -0.242819 |
| 29 | 6 | -4.416294 | 2.662854  | -0.542429 |
| 30 | 6 | -5.399617 | 3.003163  | 0.365712  |
| 31 | 6 | -5.269190 | 2.494481  | 1.668121  |
| 32 | 6 | -4.049102 | 1.939791  | 2.010750  |
| 33 | 6 | -2.947062 | 1.771310  | 1.115301  |
| 34 | 1 | -6.239793 | 3.617112  | 0.057062  |
| 35 | 1 | -6.040419 | 2.610208  | 2.423144  |
| 36 | 6 | -1.704083 | 1.837550  | 1.973358  |
| 37 | 6 | -2.125222 | 1.600407  | 3.320173  |
| 38 | 6 | -3.613611 | 1.569021  | 3.384363  |
| 39 | 6 | -1.378418 | 1.888295  | 4.450875  |
| 40 | 6 | -0.240193 | 2.682534  | 4.292049  |
| 41 | 6 | -0.241186 | 5.929180  | -0.660425 |
| 42 | 6 | 0.239388  | 5.929067  | 0.662104  |
| 43 | 6 | 0.306714  | 4.707444  | 1.307312  |
| 44 | 6 | -0.031020 | 3.457624  | 0.699392  |
| 45 | 6 | 0.029926  | 3.457825  | -0.698393 |
| 46 | 6 | -0.308182 | 4.707712  | -1.305958 |
| 47 | 1 | -0.487051 | 6.842672  | -1.192564 |
| 48 | 1 | 0.484971  | 6.842489  | 1.194495  |
| 49 | 6 | 0.682238  | 4.426430  | 2.725926  |
| 50 | 6 | 0.090597  | 3.084651  | 3.010681  |
| 51 | 6 | -0.505197 | 2.572472  | 1.814331  |
| 52 | 1 | 0.266020  | 3.129304  | 5.142188  |
| 53 | 1 | -1.792575 | 1.673685  | 5.431265  |
| 54 | 6 | 0.504309  | 2.573109  | -1.813595 |
| 55 | 6 | -0.091686 | 3.085439  | -3.009779 |
| 56 | 6 | -0.683692 | 4.426980  | -2.724632 |
| 57 | 6 | 1.703383  | 1.838558  | -1.972881 |
| 58 | 6 | 2.124482  | 1.601850  | -3.319792 |
| 59 | 6 | 1.377527  | 1.889813  | -4.450376 |
| 60 | 6 | 0.239111  | 2.683729  | -4.291270 |
| 61 | 1 | -0.267278 | 3.130603  | -5.141251 |
| 62 | 1 | 1.791673  | 1.675520  | -5.430839 |
| 63 | 6 | 2.946445  | 1.772385  | -1.114944 |
| 64 | 6 | 4.048363  | 1.941410  | -2.010451 |
| 65 | 6 | 3.612864  | 1.570871  | -3.384112 |
| 66 | 6 | 5.268305  | 2.496399  | -1.667815 |
| 67 | 6 | 5.398723  | 3.004768  | -0.365276 |
| 68 | 6 | 4.415602  | 2.663916  | 0.542873  |

|     |   |           |           |           |
|-----|---|-----------|-----------|-----------|
| 69  | 6 | 3.284914  | 1.837679  | 0.243152  |
| 70  | 1 | 6.238745  | 3.618891  | -0.056554 |
| 71  | 1 | 6.039425  | 2.612536  | -2.422886 |
| 72  | 6 | 2.820068  | 1.288444  | 1.556334  |
| 73  | 6 | 3.245989  | 2.222573  | 2.555640  |
| 74  | 6 | 4.278997  | 3.120238  | 1.957602  |
| 75  | 6 | 3.070394  | 2.055224  | 3.916690  |
| 76  | 6 | 2.595070  | 0.817788  | 4.360819  |
| 77  | 6 | 2.453185  | -0.195163 | 3.423198  |
| 78  | 6 | 2.544101  | -0.024320 | 2.006131  |
| 79  | 1 | 3.417207  | 2.822862  | 4.601780  |
| 80  | 1 | 2.534412  | 0.567909  | 5.415907  |
| 81  | 6 | 2.926607  | -1.375902 | 1.425157  |
| 82  | 6 | 3.319301  | -2.184552 | 2.533555  |
| 83  | 6 | 2.796938  | -1.597110 | 3.797243  |
| 84  | 6 | 3.304896  | -1.878285 | 0.170401  |
| 85  | 6 | 4.468914  | -2.712101 | 0.171315  |
| 86  | 6 | 4.945503  | -3.388185 | 1.277803  |
| 87  | 6 | 4.253109  | -3.206556 | 2.482663  |
| 88  | 1 | 4.512053  | -3.738634 | 3.392815  |
| 89  | 1 | 5.828969  | -4.013795 | 1.198136  |
| 90  | 6 | 5.136117  | -2.553917 | -1.154091 |
| 91  | 6 | 4.145227  | -1.841917 | -2.013398 |
| 92  | 6 | 2.931702  | -1.691915 | -1.262130 |
| 93  | 6 | 4.245734  | -1.689281 | -3.381086 |
| 94  | 6 | 3.058699  | -1.484716 | -4.095040 |
| 95  | 6 | 1.863335  | -1.621585 | -3.409212 |
| 96  | 6 | 1.734912  | -1.801493 | -1.997456 |
| 97  | 1 | 3.045444  | -1.385020 | -5.175568 |
| 98  | 1 | 5.203454  | -1.814954 | -3.875823 |
| 99  | 6 | 0.637910  | -2.090326 | -4.109972 |
| 100 | 6 | -0.023491 | -2.948105 | -3.084263 |
| 101 | 6 | 0.459588  | -2.609961 | -1.784231 |
| 102 | 6 | -0.026398 | -3.422782 | -0.743944 |
| 103 | 6 | -0.396665 | -4.751625 | -1.126671 |
| 104 | 6 | -0.766883 | -5.111519 | -2.408887 |
| 105 | 6 | -0.693194 | -4.122032 | -3.400184 |
| 106 | 1 | -1.003911 | -4.297516 | -4.425004 |
| 107 | 1 | -1.046280 | -6.136456 | -2.632537 |
| 108 | 6 | 0.027491  | -3.423118 | 0.742846  |
| 109 | 6 | 0.398123  | -4.752054 | 1.124944  |
| 110 | 6 | 0.000889  | -5.657453 | -0.001091 |
| 111 | 6 | -0.637067 | -2.092403 | 4.109508  |
| 112 | 6 | 0.024457  | -2.949580 | 3.083391  |
| 113 | 6 | -0.458708 | -2.610924 | 1.783512  |
| 114 | 6 | 0.694467  | -4.123469 | 3.398753  |
| 115 | 6 | 0.768432  | -5.112464 | 2.406984  |
| 116 | 1 | 1.048124  | -6.137429 | 2.630138  |
| 117 | 1 | 1.005206  | -4.299359 | 4.423498  |
| 118 | 8 | -6.239987 | -2.955808 | 1.471100  |
| 119 | 8 | -2.808887 | -2.102263 | -4.903707 |
| 120 | 8 | 0.332822  | -1.927015 | -5.274994 |
| 121 | 8 | 6.240964  | -2.953922 | -1.471403 |
| 122 | 8 | 2.809130  | -2.102463 | 4.903359  |
| 123 | 8 | 4.926951  | 3.986531  | 2.512698  |
| 124 | 8 | 1.259793  | 5.169436  | 3.496251  |
| 125 | 8 | -4.927900 | 3.985714  | -2.512032 |
| 126 | 8 | -1.261416 | 5.170065  | -3.494753 |
| 127 | 8 | 4.320717  | 1.409069  | -4.361689 |
| 128 | 8 | 0.000985  | -6.873507 | -0.001358 |
| 129 | 8 | -0.332005 | -1.929657 | 5.274618  |
| 130 | 8 | -4.321505 | 1.406580  | 4.361796  |

---

**Table S30.** The optimized Cartesian coordinates of the [28]circulene ketone in the ground singlet state calculated at the B3LYP/6-31(d) level of theory

| Center<br>Number | Atomic<br>Number | Coordinates (Angstroms) |           |           |
|------------------|------------------|-------------------------|-----------|-----------|
|                  |                  | X                       | Y         | Z         |
| 1                | 6                | -3.488041               | 0.760099  | -4.175299 |
| 2                | 6                | -2.625131               | -0.099444 | -3.519509 |
| 3                | 6                | -2.690453               | -0.491063 | -2.142313 |
| 4                | 6                | -3.650891               | 0.217755  | -1.377908 |
| 5                | 6                | -4.662728               | 0.909435  | -2.133626 |
| 6                | 6                | -4.601574               | 1.220421  | -3.473152 |
| 7                | 1                | -3.359112               | 0.916877  | -5.241688 |
| 8                | 1                | -5.435060               | 1.727652  | -3.949021 |
| 9                | 6                | -5.932963               | 0.901121  | -1.363172 |
| 10               | 6                | -5.605598               | 0.234138  | -0.081359 |
| 11               | 6                | -4.174616               | 0.154132  | 0.028899  |
| 12               | 6                | -3.691146               | 0.102065  | 1.348029  |
| 13               | 6                | -4.616604               | -0.482212 | 2.272806  |
| 14               | 6                | -5.972202               | -0.659105 | 2.073640  |
| 15               | 6                | -6.508894               | -0.151617 | 0.886187  |
| 16               | 1                | -7.574966               | -0.065913 | 0.701604  |
| 17               | 1                | -6.576455               | -1.086968 | 2.867247  |
| 18               | 8                | -7.021513               | 1.310268  | -1.725147 |
| 19               | 6                | -3.935966               | -0.753087 | 3.555601  |
| 20               | 6                | -2.665617               | 0.012417  | 3.474601  |
| 21               | 6                | -2.550762               | 0.661045  | 2.196127  |
| 22               | 6                | -2.012913               | 0.375089  | 4.639124  |
| 23               | 6                | -1.359372               | 1.603554  | 4.649742  |
| 24               | 6                | -1.367314               | 2.337718  | 3.480020  |
| 25               | 6                | -1.813845               | 1.878781  | 2.192936  |
| 26               | 1                | -0.979590               | 2.048485  | 5.562098  |
| 27               | 1                | -2.173486               | -0.209343 | 5.538799  |
| 28               | 8                | -4.394750               | -1.356396 | 4.508530  |
| 29               | 6                | -1.364844               | 3.820812  | 3.515469  |
| 30               | 6                | -1.883113               | 4.232216  | 2.192138  |
| 31               | 6                | -1.793190               | 3.108687  | 1.301317  |
| 32               | 6                | -2.404646               | 5.471535  | 1.880186  |
| 33               | 6                | -2.949337               | 5.616424  | 0.596859  |
| 34               | 6                | -2.640279               | 4.630902  | -0.317114 |
| 35               | 6                | -1.834150               | 3.468421  | -0.055729 |
| 36               | 1                | -2.448756               | 6.246771  | 2.638384  |
| 37               | 1                | -3.551623               | 6.468096  | 0.297340  |
| 38               | 8                | -1.087247               | 4.548991  | 4.453344  |
| 39               | 6                | -3.123411               | 4.537751  | -1.715226 |
| 40               | 6                | -2.252605               | 3.520142  | -2.356029 |
| 41               | 6                | -1.297928               | 3.030295  | -1.399030 |
| 42               | 8                | -4.003200               | 5.198349  | -2.238007 |
| 43               | 6                | -2.167607               | 3.394169  | -3.725492 |
| 44               | 6                | -0.999607               | 2.841052  | -4.241791 |
| 45               | 6                | 0.034806                | 2.597185  | -3.356231 |
| 46               | 6                | -0.018829               | 2.690739  | -1.925485 |
| 47               | 1                | -0.800443               | 2.775937  | -5.306985 |
| 48               | 1                | -2.941587               | 3.825839  | -4.352239 |
| 49               | 6                | 1.413980                | 2.779322  | -3.859973 |
| 50               | 6                | 2.183172                | 3.187121  | -2.664722 |
| 51               | 6                | 1.438404                | 2.915827  | -1.469738 |
| 52               | 8                | 1.788206                | 2.772905  | -5.019171 |
| 53               | 6                | 3.337036                | 3.946397  | -2.760648 |
| 54               | 6                | 3.748239                | 4.625456  | -1.610387 |
| 55               | 6                | 3.123428                | 4.276216  | -0.432165 |
| 56               | 6                | 2.142760                | 3.233583  | -0.287983 |

|     |   |           |           |           |
|-----|---|-----------|-----------|-----------|
| 57  | 1 | 3.795326  | 4.088461  | -3.733779 |
| 58  | 1 | 4.489540  | 5.418225  | -1.622980 |
| 59  | 6 | 3.143038  | 5.055727  | 0.834138  |
| 60  | 6 | 2.336197  | 4.264014  | 1.801392  |
| 61  | 6 | 2.043202  | 2.992773  | 1.190601  |
| 62  | 8 | 3.710157  | 6.113675  | 1.038154  |
| 63  | 6 | -2.048086 | -1.893962 | -2.077969 |
| 64  | 6 | -1.756604 | -2.248828 | -3.437856 |
| 65  | 6 | -1.831273 | -1.059759 | -4.312377 |
| 66  | 8 | -1.453224 | -0.944442 | -5.466312 |
| 67  | 6 | -2.042932 | -2.992940 | -1.190477 |
| 68  | 6 | -2.335616 | -4.264334 | -1.801077 |
| 69  | 6 | -2.166647 | -4.567996 | -3.133837 |
| 70  | 6 | -1.744405 | -3.527634 | -3.966906 |
| 71  | 1 | -1.540688 | -3.668643 | -5.022542 |
| 72  | 1 | -2.411039 | -5.557778 | -3.505772 |
| 73  | 6 | -2.142683 | -3.233484 | 0.288122  |
| 74  | 6 | -3.123294 | -4.276168 | 0.432381  |
| 75  | 6 | -3.142461 | -5.056002 | -0.833760 |
| 76  | 8 | -3.709435 | -6.114044 | -1.037668 |
| 77  | 6 | -1.438489 | -2.915463 | 1.469898  |
| 78  | 6 | -2.183373 | -3.186497 | 2.664840  |
| 79  | 6 | -3.337309 | -3.945707 | 2.760753  |
| 80  | 6 | -3.748333 | -4.625059 | 1.610596  |
| 81  | 1 | -4.489631 | -5.417826 | 1.623316  |
| 82  | 1 | -3.795746 | -4.087565 | 3.733844  |
| 83  | 6 | 0.018808  | -2.690719 | 1.925682  |
| 84  | 6 | -0.034826 | -2.597333 | 3.356420  |
| 85  | 6 | -1.414082 | -2.778983 | 3.860132  |
| 86  | 8 | -1.788320 | -2.772411 | 5.019318  |
| 87  | 6 | 1.297828  | -3.030454 | 1.399137  |
| 88  | 6 | 2.252391  | -3.520591 | 2.356102  |
| 89  | 6 | 2.167366  | -3.394927 | 3.725591  |
| 90  | 6 | 0.999479  | -2.841657 | 4.241974  |
| 91  | 1 | 0.800287  | -2.776669 | 5.307172  |
| 92  | 1 | 2.941260  | -3.826887 | 4.352243  |
| 93  | 6 | 1.834131  | -3.468279 | 0.055733  |
| 94  | 6 | 2.640353  | -4.630754 | 0.316950  |
| 95  | 6 | 3.123235  | -4.538058 | 1.715136  |
| 96  | 8 | 4.002884  | -5.198884 | 2.237886  |
| 97  | 6 | 1.793226  | -3.108339 | -1.301279 |
| 98  | 6 | 1.883400  | -4.231751 | -2.192254 |
| 99  | 6 | 2.405115  | -5.471046 | -1.880506 |
| 100 | 6 | 2.949676  | -5.616073 | -0.597161 |
| 101 | 1 | 3.552027  | -6.467703 | -0.297658 |
| 102 | 1 | 2.449418  | -6.246108 | -2.638868 |
| 103 | 6 | 1.813591  | -1.878349 | -2.192852 |
| 104 | 6 | 1.366987  | -2.337245 | -3.479893 |
| 105 | 6 | 1.364988  | -3.820337 | -3.515528 |
| 106 | 8 | 1.087511  | -4.548537 | -4.453420 |
| 107 | 6 | 2.048172  | 1.893687  | 2.077975  |
| 108 | 6 | 1.756737  | 2.248413  | 3.437906  |
| 109 | 6 | 1.744847  | 3.527160  | 3.967125  |
| 110 | 6 | 2.167341  | 4.567522  | 3.134199  |
| 111 | 1 | 2.411995  | 5.557185  | 3.506277  |
| 112 | 1 | 1.541259  | 3.668082  | 5.022800  |
| 113 | 6 | 2.690379  | 0.490748  | 2.142174  |
| 114 | 6 | 2.624963  | 0.098894  | 3.519286  |
| 115 | 6 | 1.831205  | 1.059202  | 4.312291  |
| 116 | 8 | 1.453068  | 0.943780  | 5.466178  |
| 117 | 6 | 3.650956  | -0.217837 | 1.377756  |
| 118 | 6 | 4.662795  | -0.909586 | 2.133398  |
| 119 | 6 | 4.601539  | -1.220840 | 3.472853  |

|     |   |          |           |           |
|-----|---|----------|-----------|-----------|
| 120 | 6 | 3.487911 | -0.760683 | 4.174985  |
| 121 | 1 | 3.358987 | -0.917560 | 5.241358  |
| 122 | 1 | 5.435021 | -1.728047 | 3.948749  |
| 123 | 6 | 4.174601 | -0.154075 | -0.029040 |
| 124 | 6 | 5.605607 | -0.234184 | 0.081128  |
| 125 | 6 | 5.933010 | -0.901186 | 1.362918  |
| 126 | 8 | 7.021552 | -1.310422 | 1.724840  |
| 127 | 6 | 3.691058 | -0.101923 | -1.348105 |
| 128 | 6 | 2.550533 | -0.660645 | -2.196110 |
| 129 | 6 | 2.665286 | -0.011966 | -3.474561 |
| 130 | 6 | 3.935743 | 0.753378  | -3.555652 |
| 131 | 6 | 4.616513 | 0.482295  | -2.272955 |
| 132 | 6 | 5.972124 | 0.659108  | -2.073876 |
| 133 | 6 | 6.508859 | 0.151557  | -0.886450 |
| 134 | 1 | 6.576351 | 1.086982  | -2.867495 |
| 135 | 1 | 7.574933 | 0.065739  | -0.701933 |
| 136 | 8 | 4.394518 | 1.356769  | -4.508533 |
| 137 | 6 | 1.358862 | -1.603048 | -4.649601 |
| 138 | 6 | 2.012406 | -0.374591 | -4.639017 |
| 139 | 1 | 2.172907 | 0.209842  | -5.538707 |
| 140 | 1 | 0.979051 | -2.048019 | -5.561929 |

**Table S31.** The optimized Cartesian coordinates of the [30]circulene ketone in the ground singlet state calculated at the B3LYP/6-31(d) level of theory

| Center<br>Number | Atomic<br>Number | Coordinates (Angstroms) |          |           |
|------------------|------------------|-------------------------|----------|-----------|
|                  |                  | X                       | Y        | Z         |
| 1                | 6                | 5.082984                | 2.630809 | 0.448697  |
| 2                | 6                | 5.347434                | 3.402551 | -0.781778 |
| 3                | 6                | 4.233019                | 3.076494 | -1.697079 |
| 4                | 6                | 3.448179                | 2.013086 | -1.113306 |
| 5                | 6                | 3.739911                | 2.104428 | 0.371697  |
| 6                | 6                | 5.915206                | 2.604953 | 1.543885  |
| 7                | 6                | 5.376338                | 2.058168 | 2.706536  |
| 8                | 6                | 4.011730                | 1.845070 | 2.712200  |
| 9                | 6                | 3.084890                | 2.006392 | 1.622198  |
| 10               | 1                | 6.916897                | 3.017103 | 1.476950  |
| 11               | 1                | 5.938300                | 1.897024 | 3.620368  |
| 12               | 6                | 4.180547                | 3.522698 | -2.996297 |
| 13               | 6                | 3.316369                | 2.835159 | -3.841219 |
| 14               | 6                | 2.761145                | 1.663581 | -3.362692 |
| 15               | 6                | 2.901841                | 1.093072 | -2.052028 |
| 16               | 1                | 3.175584                | 3.090492 | -4.885923 |
| 17               | 1                | 4.835254                | 4.323944 | -3.323388 |
| 18               | 6                | 1.687964                | 2.197710 | 2.287757  |
| 19               | 6                | 1.874060                | 1.757085 | 3.645201  |
| 20               | 6                | 3.299826                | 1.539065 | 3.953473  |
| 21               | 6                | 1.015757                | 1.913166 | 4.714616  |
| 22               | 6                | -0.073194               | 2.746530 | 4.534967  |
| 23               | 6                | -0.238044               | 3.297936 | 3.280555  |
| 24               | 6                | 0.510490                | 2.997231 | 2.085255  |
| 25               | 1                | 1.322801                | 1.548007 | 5.689449  |
| 26               | 1                | -0.709279               | 3.077646 | 5.347264  |
| 27               | 6                | 0.010660                | 4.030770 | 1.059917  |
| 28               | 6                | -0.528125               | 5.114834 | 1.840242  |
| 29               | 6                | -0.926520               | 4.601603 | 3.158597  |
| 30               | 8                | 3.791817                | 1.306504 | 5.046216  |
| 31               | 8                | 6.293664                | 4.138447 | -1.002292 |
| 32               | 8                | -1.601650               | 5.178166 | 3.993559  |
| 33               | 6                | -0.649869               | 6.435020 | 1.463639  |

|    |   |           |           |           |
|----|---|-----------|-----------|-----------|
| 34 | 6 | -0.143225 | 6.765119  | 0.204129  |
| 35 | 6 | 0.130369  | 5.704456  | -0.629771 |
| 36 | 6 | -0.026317 | 4.302591  | -0.322464 |
| 37 | 6 | 0.703468  | 5.817432  | -1.982336 |
| 38 | 6 | 0.521503  | 4.482655  | -2.590440 |
| 39 | 6 | -0.152104 | 3.603310  | -1.664711 |
| 40 | 8 | 1.178637  | 6.811768  | -2.504348 |
| 41 | 1 | -1.055321 | 7.158250  | 2.163648  |
| 42 | 1 | 0.000000  | 7.782722  | -0.144439 |
| 43 | 6 | 0.698076  | 4.289890  | -3.939892 |
| 44 | 6 | 0.132476  | 3.144468  | -4.484287 |
| 45 | 6 | -0.686737 | 2.395222  | -3.661901 |
| 46 | 6 | -0.976323 | 2.604294  | -2.268196 |
| 47 | 1 | 1.192712  | 5.054590  | -4.530311 |
| 48 | 1 | 0.198281  | 2.880169  | -5.532933 |
| 49 | 6 | -2.397549 | 1.966532  | -2.052028 |
| 50 | 6 | -2.821276 | 1.559431  | -3.362692 |
| 51 | 6 | -1.707791 | 1.571092  | -4.321073 |
| 52 | 8 | -1.702659 | 1.138334  | -5.461288 |
| 53 | 6 | -4.113504 | 1.454480  | -3.841219 |
| 54 | 6 | -5.141020 | 1.859111  | -2.996297 |
| 55 | 6 | -4.780832 | 2.127655  | -1.697079 |
| 56 | 6 | -3.467473 | 1.979668  | -1.113306 |
| 57 | 1 | -4.264237 | 1.204890  | -4.885923 |
| 58 | 1 | -6.162272 | 2.025481  | -3.323388 |
| 59 | 6 | -5.620412 | 2.929738  | -0.781778 |
| 60 | 6 | -4.819839 | 3.086589  | 0.448697  |
| 61 | 6 | -3.692444 | 2.186645  | 0.371697  |
| 62 | 6 | -5.213559 | 3.820242  | 1.543885  |
| 63 | 6 | -4.470595 | 3.626962  | 2.706536  |
| 64 | 6 | -3.603743 | 2.551725  | 2.712200  |
| 65 | 6 | -3.280031 | 1.668397  | 1.622198  |
| 66 | 1 | -6.071336 | 4.481657  | 1.476950  |
| 67 | 1 | -4.612021 | 4.194207  | 3.620368  |
| 68 | 8 | -6.730832 | 3.381249  | -1.002292 |
| 69 | 6 | -2.747254 | 0.362965  | 2.287757  |
| 70 | 6 | -2.458711 | 0.744441  | 3.645201  |
| 71 | 6 | -2.982782 | 2.088200  | 3.953473  |
| 72 | 8 | -3.027374 | 2.630558  | 5.046216  |
| 73 | 6 | -2.850923 | -1.056519 | 2.085255  |
| 74 | 6 | -2.737074 | -1.855120 | 3.280555  |
| 75 | 6 | -2.341967 | -1.436653 | 4.534967  |
| 76 | 6 | -2.164729 | -0.076912 | 4.714616  |
| 77 | 1 | -2.002013 | 0.371576  | 5.689449  |
| 78 | 1 | -2.310681 | -2.153076 | 5.347264  |
| 79 | 6 | -3.496079 | -2.006153 | 1.059917  |
| 80 | 6 | -4.165514 | -3.014787 | 1.840242  |
| 81 | 6 | -3.521845 | -3.103191 | 3.158597  |
| 82 | 8 | -3.683599 | -3.976153 | 3.993559  |
| 83 | 6 | -5.247956 | -3.780313 | 1.463639  |
| 84 | 6 | -5.787152 | -3.506596 | 0.204129  |
| 85 | 6 | -5.005388 | -2.739326 | -0.629771 |
| 86 | 6 | -3.712995 | -2.174086 | -0.322464 |
| 87 | 1 | -6.740035 | -3.891361 | -0.144439 |
| 88 | 1 | -5.671566 | -4.493060 | 2.163648  |
| 89 | 6 | -5.389778 | -2.299495 | -1.982336 |
| 90 | 6 | -4.142845 | -1.789693 | -2.590440 |
| 91 | 6 | -3.044506 | -1.933381 | -1.664711 |
| 92 | 8 | -6.488483 | -2.385154 | -2.504348 |
| 93 | 6 | -4.064192 | -1.540393 | -3.939892 |
| 94 | 6 | -2.789427 | -1.457507 | -4.484287 |
| 95 | 6 | -1.730954 | -1.792343 | -3.661901 |
| 96 | 6 | -1.767223 | -2.147667 | -2.268196 |



|     |   |           |           |           |
|-----|---|-----------|-----------|-----------|
| 97  | 1 | -4.973759 | -1.494376 | -4.530311 |
| 98  | 1 | -2.593440 | -1.268368 | -5.532933 |
| 99  | 6 | -0.504292 | -3.059604 | -2.052028 |
| 100 | 6 | 0.060131  | -3.223013 | -3.362692 |
| 101 | 6 | -0.506710 | -2.264537 | -4.321073 |
| 102 | 8 | -0.134497 | -2.043713 | -5.461288 |
| 103 | 6 | 2.743546  | -0.456626 | -2.268196 |
| 104 | 6 | 2.417692  | -0.602879 | -3.661901 |
| 105 | 6 | 2.214501  | 0.693445  | -4.321073 |
| 106 | 8 | 1.837156  | 0.905379  | -5.461288 |
| 107 | 6 | 2.656951  | -1.686961 | -4.484287 |
| 108 | 6 | 3.366116  | -2.749497 | -3.939892 |
| 109 | 6 | 3.621342  | -2.692962 | -2.590440 |
| 110 | 6 | 3.196610  | -1.669930 | -1.664711 |
| 111 | 1 | 2.395158  | -1.611801 | -5.532933 |
| 112 | 1 | 3.781047  | -3.560214 | -4.530311 |
| 113 | 6 | 3.739311  | -2.128504 | -0.322464 |
| 114 | 6 | 4.875020  | -2.965131 | -0.629771 |
| 115 | 6 | 4.686310  | -3.517937 | -1.982336 |
| 116 | 6 | 3.485420  | -2.024617 | 1.059917  |
| 117 | 6 | 2.340433  | -1.940713 | 2.085255  |
| 118 | 6 | 2.975118  | -1.442816 | 3.280555  |
| 119 | 6 | 4.448365  | -1.498412 | 3.158597  |
| 120 | 6 | 4.693639  | -2.100047 | 1.840242  |
| 121 | 6 | 5.897826  | -2.654707 | 1.463639  |
| 122 | 6 | 5.930378  | -3.258523 | 0.204129  |
| 123 | 1 | 6.740035  | -3.891361 | -0.144439 |
| 124 | 1 | 6.726887  | -2.665190 | 2.163648  |
| 125 | 8 | 5.309846  | -4.426614 | -2.504348 |
| 126 | 8 | 5.285248  | -1.202014 | 3.993559  |
| 127 | 6 | 1.059290  | -2.560675 | 2.287757  |
| 128 | 6 | 0.584650  | -2.501526 | 3.645201  |
| 129 | 6 | 1.148972  | -1.836255 | 4.714616  |
| 130 | 6 | 2.415162  | -1.309877 | 4.534967  |
| 131 | 1 | 3.019959  | -0.924570 | 5.347264  |
| 132 | 1 | 0.679213  | -1.919582 | 5.689449  |
| 133 | 6 | 0.195141  | -3.674789 | 1.622198  |
| 134 | 6 | -0.407987 | -4.396795 | 2.712200  |
| 135 | 6 | -0.317043 | -3.627266 | 3.953473  |
| 136 | 8 | -0.764443 | -3.937062 | 5.046216  |
| 137 | 6 | -0.047468 | -4.291072 | 0.371697  |
| 138 | 6 | -0.263145 | -5.717398 | 0.448697  |
| 139 | 6 | -0.701647 | -6.425195 | 1.543885  |
| 140 | 6 | -0.905744 | -5.685129 | 2.706536  |
| 141 | 1 | -1.326279 | -6.091231 | 3.620368  |
| 142 | 1 | -0.845561 | -7.498760 | 1.476950  |
| 143 | 6 | 0.019294  | -3.992753 | -1.113306 |
| 144 | 6 | 0.547812  | -5.204149 | -1.697079 |
| 145 | 6 | 0.272979  | -6.332289 | -0.781778 |
| 146 | 8 | 0.437169  | -7.519696 | -1.002292 |
| 147 | 6 | 0.797135  | -4.289639 | -3.841219 |
| 148 | 6 | 0.960473  | -5.381809 | -2.996297 |
| 149 | 1 | 1.327018  | -6.349425 | -3.323388 |
| 150 | 1 | 1.088653  | -4.295382 | -4.885923 |

---
